# Supplementary material for: Training general practitioners in melanoma diagnosis: a scoping review of the literature
Source: PubMed Central journal article supplement — BMJ Open. 2021 Mar 23;11(3):e043926. doi: 10.1136/bmjopen-2020-043926 (PMC7993310; doi:10.1136/bmjopen-2020-043926), 2021-03-23
Supplement: bmjopen-2020-043926.draft_revisions.pdf [file bmjopen-2020-043926.draft_revisions.pdf]

# BMJ Open

BMJ Open is committed to open peer review. As part of this commitment we make the peer review history of every article we publish publicly available.

When an article is published we post the peer reviewers' comments and the authors' responses online. We also post the versions of the paper that were used during peer review. These are the versions that the peer review comments apply to.

The versions of the paper that follow are the versions that were submitted during the peer review process. They are not the versions of record or the final published versions. They should not be cited or distributed as the published version of this manuscript.

BMJ Open is an open access journal and the full, final, typeset and author-corrected version of record of the manuscript is available on our site with no access controls, subscription charges or pay-per-view fees (<http://bmjopen.bmj.com>).

If you have any questions on BMJ Open's open peer review process please email [info.bmjopen@bmj.com](mailto:info.bmjopen@bmj.com)

# BMJ Open

## Training general practitioners in melanoma diagnosis: a scoping review of the literature.

|                               |                                                                                                                                                                                                                                                                                                                                                                                                                                           |
|-------------------------------|-------------------------------------------------------------------------------------------------------------------------------------------------------------------------------------------------------------------------------------------------------------------------------------------------------------------------------------------------------------------------------------------------------------------------------------------|
| Journal:                      | <i>BMJ Open</i>                                                                                                                                                                                                                                                                                                                                                                                                                           |
| Manuscript ID                 | bmjopen-2020-043926                                                                                                                                                                                                                                                                                                                                                                                                                       |
| Article Type:                 | Original research                                                                                                                                                                                                                                                                                                                                                                                                                         |
| Date Submitted by the Author: | 18-Aug-2020                                                                                                                                                                                                                                                                                                                                                                                                                               |
| Complete List of Authors:     | Harkemanne, Evelyne; Cliniques universitaires Saint-Luc, Dermatology; Université catholique de Louvain Institut de Recherche Expérimentale et Clinique<br>Baeck, Marie; Cliniques universitaires Saint-Luc, Dermatology; Université catholique de Louvain Institut de Recherche Expérimentale et Clinique<br>Tromme, Isabelle; Cliniques universitaires Saint-Luc, Dermatology; Cliniques universitaires Saint-Luc Institut Roi Albert II |
| Keywords:                     | GENERAL MEDICINE (see Internal Medicine), Dermatological tumours < DERMATOLOGY, EDUCATION & TRAINING (see Medical Education & Training)                                                                                                                                                                                                                                                                                                   |
|                               |                                                                                                                                                                                                                                                                                                                                                                                                                                           |

SCHOLARONE™  
Manuscripts

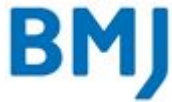

I, the Submitting Author has the right to grant and does grant on behalf of all authors of the Work (as defined in the below author licence), an exclusive licence and/or a non-exclusive licence for contributions from authors who are: i) UK Crown employees; ii) where BMJ has agreed a CC-BY licence shall apply, and/or iii) in accordance with the terms applicable for US Federal Government officers or employees acting as part of their official duties; on a worldwide, perpetual, irrevocable, royalty-free basis to BMJ Publishing Group Ltd ("BMJ") its licensees and where the relevant Journal is co-owned by BMJ to the co-owners of the Journal, to publish the Work in this journal and any other BMJ products and to exploit all rights, as set out in our [licence](#).

The Submitting Author accepts and understands that any supply made under these terms is made by BMJ to the Submitting Author unless you are acting as an employee on behalf of your employer or a postgraduate student of an affiliated institution which is paying any applicable article publishing charge ("APC") for Open Access articles. Where the Submitting Author wishes to make the Work available on an Open Access basis (and intends to pay the relevant APC), the terms of reuse of such Open Access shall be governed by a Creative Commons licence – details of these licences and which [Creative Commons](#) licence will apply to this Work are set out in our licence referred to above.

Other than as permitted in any relevant BMJ Author's Self Archiving Policies, I confirm this Work has not been accepted for publication elsewhere, is not being considered for publication elsewhere and does not duplicate material already published. I confirm all authors consent to publication of this Work and authorise the granting of this licence.

# Training general practitioners in melanoma diagnosis: a scoping review of the literature

E. Harkemanne M.D.,<sup>1,2</sup> M. Baeck M.D. Ph.D.,<sup>1,2</sup> I. Tromme M.D. Ph.D.<sup>1,2,3</sup>

<sup>1</sup>Dermatology department, Cliniques universitaires Saint-Luc, Brussels, Belgium

<sup>2</sup>Institute of Experimental and Clinical Research (IREC), UCLouvain, Brussels, Belgium

<sup>3</sup>King Albert II Cancer and Hematology Institute, Cliniques universitaires Saint-Luc, Brussels, Belgium

## Corresponding Author:

Evelyne Harkemanne, M.D.

Dermatology department

Cliniques universitaires Saint-Luc

Avenue Hippocrate, 10

B-1200 Brussels, Belgium

Email: evelyne.harkemanne@uclouvain.be

**Funding sources:** None

**Conflict of Interest:** None declared

**Reprint requests:** Evelyne Harkemanne

**Manuscript word count:** 3454

**Figure:** 1

**Tables:** 4

## **Abstract**

*Background:* General practitioners (GPs) are recognized to play a key role in early melanoma detection. In order to help GPs deal with suspicious skin lesions, melanoma diagnostic training programs were developed. However, it is unclear whether these programs guarantee the acquisition of skills that will be applied by the GPs in their daily clinical practice and maintained over time.

*Objectives:* This scoping review aimed to examine and compare educational programs training GPs in melanoma diagnosis using clinical (naked eye) examination alone, dermoscopy alone or clinical diagnosis followed by dermoscopy and sought to inform on the long-term sustainability of the GPs' acquired skills.

*Eligibility criteria:* Studies eligible for inclusion evaluated educational programs teaching diagnosis of melanoma to GPs. MEDLINE, EMBASE, and Cochrane databases were searched for relevant articles between February and May 2020.

*Results:* Forty-five relevant articles were found assessing 31 educational programs. Most programs that improved the diagnostic accuracy and long-term performances of the GPs, i.e. increase in confidence, decrease in dermatologist referral of benign skin lesions, and improvement of the benign/malignant ratio of excised skin lesions, trained the GPs in clinical diagnosis followed by dermoscopy. To maintain the GPs' acquired performances in the long term, they provided refresher training material.

*Conclusion:* This review shows that studies generally report positive outcomes from the training of GPs in melanoma diagnosis. However, refresher training material seemed necessary to maintain the GPs' acquired skills. The optimal form and ideal frequency for these updates have yet to be defined.

### **Strengths and limitations of the review**

- Systematic review conducted following the guidelines of the PRISMA-Scr (Preferred Reporting Items for Systematic reviews and Meta-Analyses extension for Scoping Reviews) checklist
- It evaluates all educational programs in melanoma diagnosis for general practitioners
- Specifically, the review examines the long-term effect of the educational programs and the value providing regular refresher training sessions after the training
- This review led inevitably to some publication bias as only English language peer-reviewed articles were included.

### **Acknowledgements**

The authors would like to thank Graziella Messina, Research Assistant at the Health Sciences Library of the Catholic University of Louvain, UCLouvain in Brussels, for her help in developing the research strategy for this review.

### **Contributorship statement**

E. Harkemanne developed the research protocol, completed the literature search and screened the articles for inclusion, extracted the data, synthesised the findings, interpreted the results and drafted the manuscript. M. Baeck screened the articles for inclusion, extracted data and critically revised the manuscript. I. Tromme developed the protocol, independently reviewed the articles for inclusion, extracted data, interpreted the results and critically revised the manuscript. All authors approved the final version.

### **Data availability statement**

All data relevant to the study are included in the article.

## **Introduction**

Early melanoma detection is essential to reduce morbidity and mortality of melanoma patients.<sup>1</sup> Given the increased incidence of this aggressive skin cancer, primary care physicians (PCPs) are recognized to play a key role in early melanoma diagnosis.<sup>2-4</sup> PCPs are health care professionals providing first and continuing medical care to a patient. They include general practitioners (GPs), internists, physician assistants, and registered nurses, among others. In this review, we decided to focus on GPs who take care of patients in community settings and are, in most countries, the first point of contact for any patient with a health issue.

To improve the GPs' diagnostic accuracy, educational training programs in melanoma diagnosis have been developed. At first, training courses in melanoma diagnosis were proposed using clinical (naked eye) examination alone. A systematic review<sup>5</sup> published in 2011 reported on 20 studies evaluating 13 educational interventions in clinical melanoma diagnosis for PCPs. All these evaluated interventions demonstrated to improve the diagnostic accuracy and melanoma management.

Later on, educational programs including dermoscopy training were created and evaluated for primary care. So far, dermoscopy has been the most widely non-invasive *in vivo* technique used in clinical practice to assess skin tumors.<sup>6</sup> It uses a handheld device, which allows observation of skin structures invisible to the naked eye. However, its sensitivity and specificity are operator-dependent (trained *vs.* untrained physicians).<sup>7</sup> To note that 92% sensitivity and 95% specificity can be achieved for melanoma by a trained dermatologist using visual inspection plus *in vivo* dermoscopy.<sup>8</sup> In primary care, dermoscopy has also been shown to be an effective tool for the triage of suspicious pigmented skin lesions when performed by properly trained PCPs.<sup>9,10</sup> Yet, the minimum in training to reach competence is still unknown.<sup>11</sup>

The previously published reviews<sup>5,11-14</sup> on training programs in melanoma diagnosis for GPs focused on the content, teaching method, outcome measures and study-by-study efficacy of the evaluated educational interventions. However, they did not assess whether the GPs' acquired skills were measured in the short or long term. Yet, given the increasing burden of melanoma on general practice, it is crucial to know whether these programs are capable of teaching GPs easily applicable and sustainable skills in melanoma diagnosis and management.

1  
2  
3 This scoping review aimed to examine educational programs training GPs in melanoma  
4 diagnosis using clinical (naked eye) examination alone, dermoscopy alone or clinical diagnosis  
5 followed by dermoscopy. It also sought to inform on the long-term sustainability of the GPs'  
6 acquired skills.  
7  
8  
9

## 10 **Material and methods**

11  
12  
13  
14 To carry out this literature review, a scoping review seemed the most appropriate. Indeed, the  
15 results from studies on educational programs on melanoma diagnosis for GPs presented with a  
16 wide range of study designs and heterogeneous outcome measures, which made it impossible  
17 to formally assess the quality of these studies and to conduct a meta-analysis. To conduct this  
18 scoping review, the guidelines of the PRISMA-ScR (Preferred Reporting Items for Systematic  
19 reviews and Meta-Analyses extension for Scoping Reviews) checklist were followed.<sup>15</sup>  
20  
21  
22  
23

### 24 **Eligibility criteria**

25  
26  
27 Studies eligible for inclusion in this review (Table 1) evaluated educational programs teaching  
28 either clinical diagnosis of melanoma and/or diagnosis using dermoscopy, both designed  
29 primarily for PCPs including GPs. Indeed, the population of interest were qualified GPs and  
30 GP trainees. Studies that trained PCPs not including GPs were not eligible. Specialists and GPs  
31 working in hospital settings and/or specialized clinics were excluded. Studies where no  
32 participant training in melanoma diagnosis was proposed and studies evaluating exclusively  
33 nonmelanoma skin cancer detection were excluded. Studies using teledermoscopy and  
34 computer-aided diagnosis of melanoma were not assessed as they do not require specific  
35 education in melanoma recognition by the participants. Outcomes of interest were the type of  
36 educational program and the short and/or long-term evaluation of its efficacy on the GPs' skills.  
37 Finally, articles not subject to peer review and written in languages other than English were not  
38 taken into account.  
39  
40  
41  
42  
43  
44  
45  
46  
47  
48

### 49 **Data sources and study selection**

50  
51 Literature searches were undertaken between February and May 2020. MEDLINE, EMBASE,  
52 and Cochrane databases were searched for relevant articles published between 1995 and End  
53 of May 2020. Studies were selected for inclusion by three authors (EH, MB, and IT), with IT  
54 providing the final decision in the event of disagreement.  
55  
56  
57  
58  
59  
60



1  
2  
3 To cover all the literature on the subject, 4 categories of terms were identified: (1) general  
4 practitioners, family doctor, general medicine, family practice, primary care physicians; (2)  
5 education, continuing medical education (3) melanoma, malignant melanoma, cutaneous  
6 melanoma, skin neoplasms; (4) diagnosis, cancer early detection. In MEDLINE, the following  
7 Medical Subject Headings (MeSH) were used: *general practitioners* OR *family practice* OR  
8 *primary care physicians* OR *general medicine* AND *melanoma* AND *diagnosis*. No limits were  
9 defined. In EMBASE, Emtree terms were exploded: *general practitioner*, *family doctor*,  
10 *primary care*, *family physician*, *primary care physician*, *melanoma*, *diagnosis*, and *education*.  
11 In the Cochrane database, the following terms were searched: *melanoma* AND *diagnosis* AND  
12 *general practitioners* OR *family medicine* AND *dermoscopy*. In addition, the reference lists of  
13 included studies were screened as a source of further relevant articles.  
14  
15  
16  
17  
18  
19  
20  
21  
22  
23

### 24 **Data extraction**

25 Two authors (EH and MB) reviewed all included articles and independently collected data.  
26 Extracted data included authors, year of publication, origin of the article, study design, number  
27 of participating GPs, type of educational program, type of outcome measures and short- and/or  
28 long-term evaluation of these outcomes. The type of educational program included training  
29 content, teaching method, training duration and refresher training material (if provided). To  
30 facilitate comparison with data found in previous reviews, all these data were reported into  
31 categories adapted from those presented by Fee *et al.*<sup>14</sup>  
32  
33  
34  
35  
36  
37  
38

39 Table 2 gives the definition of the different categories. The training content was subdivided into  
40 6 components: epidemiology, clinical diagnosis, clinical algorithm, dermoscopic diagnosis,  
41 dermoscopic algorithm and management. The teaching method was considered either as live,  
42 in the form of scientific literature, e-learning, or self-assessment and the refresher training  
43 material specified the material available for participants to refresh their skills after the training.  
44 The outcome measures were expressed either in terms of competence or in terms of  
45 performance, according to the assessment approach of continuing medical education programs  
46 proposed by Moore.<sup>16</sup> Finally, since the limits between short-term and long-term evaluation of  
47 a medical educational program are not standardized, arbitrary limits have been chosen based on  
48 the observations made during this literature review.  
49  
50  
51  
52  
53  
54  
55  
56  
57

### 58 **Patient and Public Involvement**

59 No patient and public involvement was required for this review.  
60

## **Results**

In total, 325 articles were identified from the electronic database searches, as shown in the PRISMA flowchart (Figure 1).<sup>17</sup> At the end of the study selection process, 45 relevant articles were included in the review analysis. These articles reported on five reviews and 37 studies, which assessed 31 educational interventions.

### **Study designs**

Thirty-seven interventional studies with a range of study designs were found: 11 randomized controlled trials (RCTs)<sup>9,10,26,27,18–25</sup>, 19 diagnostic accuracy studies<sup>28,29,38–46,30–37</sup>, three cohort studies<sup>47–49</sup> and three case-control study.<sup>50–52</sup> To note that five of the 31 trainings were assessed twice.<sup>22,25,27,30,47</sup>

Four systematic reviews were identified: one on training PCPs in clinical melanoma diagnosis,<sup>5</sup> two on training PCPs in dermoscopy for melanoma diagnosis,<sup>12,13</sup> and one on the use of dermoscopy in primary care.<sup>11</sup> A scoping review on training PCPs in dermoscopy<sup>14</sup> was also included. The final three articles were descriptive articles of the educational programs and study protocols.<sup>53–55</sup>

### **Educational programs**

The educational programs in melanoma diagnosis for GPs varied in terms of content, teaching method and outcome measures. The characteristics of these training programs are summarized in Table 3.

#### *Training content*

Of the 31 educational programs, 15 involved training GPs in clinical diagnosis, five in dermoscopic diagnosis alone, and 11 trained GPs in both melanoma diagnostic methods. Twelve (80%) of the clinical diagnostic training programs involved also learning of epidemiology and 11 (73%) learning of management guidelines for suspicious lesions. Only 7 (47%) programs teaching clinical diagnosis used an algorithm to teach melanoma recognition, with the ABCD(E) rule<sup>56</sup> (Asymmetry, uneven Borders, uneven Colors, Diameter > 6mm, and Evolution) being most commonly taught. Of the dermoscopic training programs, 12 (80%) included learning of at least one dermoscopic algorithm (Menzies' method,<sup>20,33,35,38</sup> Three-point checklist,<sup>9,38,39</sup> the 7-point checklist,<sup>10,33</sup> TADA,<sup>42,45</sup> the ABCD rule,<sup>33,36</sup> BLINCK,<sup>38</sup> and

1  
2  
3 pattern analysis<sup>33,52</sup>). In addition, two educational programs included training on other  
4 diagnostic tools, such as sequential digital dermoscopy imaging<sup>35</sup> and polaroid instant camera  
5 photography.<sup>22</sup>  
6  
7  
8  
9

### 10 *Teaching method, training duration and refresher training material*

11 Live training courses and the use of educational books, posters or videos (literature) were the  
12 two preferred teaching methods of clinical diagnostic training programs. Five trainings used  
13 also an e-learning approach.<sup>25,27,29,49,51</sup> The most common teaching method used in dermoscopic  
14 training programs was live training. This approach was combined to literature and/or e-learning  
15 in six programs. Three programs also used self-assessment. Overall, the teaching method did  
16 not appear to have influenced the program outcomes. Duration of training varied from 75  
17 minutes to 1 day. It was not specified in two studies<sup>28,38</sup> and was participant dependent in six  
18 studies using self-assessment methods. Six dermoscopic diagnostic training  
19 programs<sup>26,35,36,39,47,52</sup> and three programs in clinical diagnosis<sup>23,34,48</sup> provided regular refresher  
20 training material such as unlimited e-learning access or self-assessment training sessions.  
21  
22  
23  
24  
25  
26  
27  
28  
29

### 30 *Training outcomes*

31 Table 4 summarizes the outcome measures of the studies. In the selected studies, the GPs'  
32 competences were generally measured in the short term while the performances of the GPs were  
33 measured in the long term after the training.  
34  
35  
36  
37  
38

39 Eight clinical diagnostic training programs and seven dermoscopic training programs were  
40 assessed only in the short term (Table 4A). For these studies, the most evaluated competences  
41 were the diagnostic accuracy and the appropriate management of the GPs measured in a training  
42 setting. The most evaluated performance in the short-term, measured in a clinical setting, was  
43 the GPs' confidence in diagnosing melanoma. Except for two, all showed a positive impact of  
44 their intervention.<sup>18,24</sup> Four clinical diagnostic training programs and three dermoscopic  
45 training programs were only assessed in the long term (Table 4B). The most evaluated  
46 performances, measured in daily clinical practice, were the GPs' diagnostic accuracy and the  
47 benign/malignant ratio of excised lesions. Three studies<sup>9,34,47</sup> reported improvement of the GPs'  
48 performances on melanoma diagnosis. The other studies reported none. Finally, three clinical  
49 diagnostic and seven dermoscopic training programs were evaluated in the short and long term  
50 (Table 4C). All training programs demonstrated to improve the GPs' competences measured in  
51 a training setting in the short term, except one.<sup>24</sup> In the long term, eight  
52  
53  
54  
55  
56  
57  
58  
59  
60

1  
2  
3 trainings<sup>10,35,36,39,47,48,51,52</sup> reported significant improvement of the GPs' performances for the  
4 diagnosis of melanoma and benign skin lesions. This led to either a decrease in the referral rates  
5 to dermatologists<sup>35,39,51</sup> and/or a decrease in the ratio of benign/malignant excised skin  
6 lesions.<sup>35,47</sup> Among the major studies, Koelink *et al.*<sup>10</sup> found that their dermoscopic training  
7 program improved the GPs' performances up to 1.25 times greater diagnostic accuracy for skin  
8 lesions including melanomas in the long term. In a French department, Grange *et al.*<sup>48</sup> observed  
9 an impressive reduction of the incidence of advanced melanomas (Breslow thickness  $\geq 3$  mm)  
10 during the 3-year period after their GP training campaign in clinical melanoma diagnosis. A  
11 very recent study conducted by Marra *et al.*<sup>51</sup> found that of a total of 1662 referrals, GPs trained  
12 in melanoma diagnosis had a better quality of referrals than untrained GPs, leading to less  
13 potentially unnecessary referrals. However, two educational programs<sup>25,26</sup> were unable to  
14 maintain the GPs' acquired performances in the long term.

## 25 **Discussion**

26 This scoping review aimed to examine educational programs training GPs in melanoma  
27 diagnosis using clinical (naked eye) examination alone, dermoscopy alone or clinical diagnosis  
28 followed by dermoscopy and sought to inform on the long-term sustainability of the GPs'  
29 acquired skills.  
30  
31  
32  
33  
34  
35

36 In total, 31 educational programs were found. Fifteen programs trained GPs in clinical diagnosis  
37 alone and 16 trained GPs in dermoscopy (Table 3). Duration of training varied from 75 minutes  
38 to 1 day and various teaching methods were used among live training courses, educational  
39 books and e-learning. After the course, nine programs provided their participants with regular  
40 refresher training material such as unlimited e-learning access or self-assessment training  
41 sessions.  
42  
43  
44  
45  
46  
47

### 48 **Types of educational programs with positive long-term outcomes**

49 Two main diagnostic training methods, clinical examination and diagnosis using dermoscopy,  
50 were identified. Most reported educational programs that improved the long-term diagnostic  
51 accuracy and changed the GPs' melanoma practice patterns, such as reducing the referral rates  
52 to dermatologists and the benign/malignant ratio of excised skin lesions, trained their  
53 participating GPs in both methods.  
54  
55  
56  
57  
58  
59  
60

1  
2  
3 Educational programs in clinical examination alone might have been less likely to convince  
4 positive long-term outcomes than programs teaching both methods because they used less  
5 powerful measures of performance. They compared, for instance, the GPs' confidence and the  
6 number of total-body skin examinations performed before and after training, whereas programs  
7 teaching both methods measured the GPs' diagnostic accuracy and decrease of referral rates to  
8 dermatologists. Nevertheless, a very recent study conducted in the Netherlands compared the  
9 quality of referral and diagnostic accuracy of GPs mostly trained in clinical melanoma diagnosis  
10 alone to that of untrained GPs and demonstrated a significant better outcome by the trained  
11 GPs.<sup>51</sup>  
12  
13  
14  
15  
16  
17  
18  
19

20 To note that only one training in dermoscopy alone was found to be assessed in the long term.<sup>52</sup>  
21 Indeed, it is more and more common and pertinent to teach GPs in clinical examination  
22 followed by dermoscopy. This teaching method is furthermore supported by a recent Cochrane  
23 review,<sup>8</sup> which found that dermoscopy alone was less accurate than clinical examination  
24 followed by dermoscopy, for the diagnosis of melanoma.  
25  
26  
27  
28  
29

30 Moreover, the same Cochrane review<sup>8</sup> suggested that dermoscopic algorithms were most useful  
31 to train non-experts in dermoscopy. In the present review, we found that five of the programs  
32 with long-term positive impact used dermoscopic algorithms to teach melanoma  
33 diagnosis.<sup>10,35,36,39,52</sup> These algorithms, Menzies' method,<sup>57</sup> the ABCD rule,<sup>58</sup> pattern analysis  
34 and the 7-point checklist,<sup>59</sup> were designed at first for trained physicians and afterwards tested  
35 as effective when used by nonexperts.<sup>60</sup> Other algorithms, such as the Three-point checklist<sup>61</sup>  
36 were created directly for use by PCPs. In 2005, Dolianitis *et al.*<sup>33</sup> compared the performance of  
37 four of these algorithms (Menzies' method, the 7-point checklist, the ABCD rule, and pattern  
38 analysis) for teaching dermoscopy to untrained GPs and found similar performances for all  
39 algorithms. In this review, similar observation was made among the trainings that improved the  
40 GPs' performances, each using a different algorithm. Recently, a new promising 3-step  
41 dermoscopic algorithm, The Triage Amalgamated Dermoscopic Algorithm (TADA), has been  
42 proposed especially for GPs.<sup>62</sup> Three studies already confirmed the short-term efficacy of  
43 TADA in improving the GPs' melanoma diagnostic accuracy.<sup>42,45,63</sup> A recent study  
44 demonstrated that teaching only the first step of the TADA was already enough to improve the  
45 diagnostic accuracy of untrained GPs from 76.9% to 95% for melanoma.<sup>46</sup> However, the long-  
46 term performance of these trainings using the TADA-algorithm has not been tested yet.  
47  
48  
49  
50  
51  
52  
53  
54  
55  
56  
57  
58  
59  
60

1  
2  
3 In the literature, the main limitation to the use of dermoscopy in general practice was reported  
4 to be the large number of training hours in order to become competent.<sup>64,65</sup> At this time, there  
5 is no evidence on the optimal length of training, even though it has been demonstrated that  
6 diagnostic accuracy of dermoscopy depends on the degree of training of the practitioner.<sup>66</sup> A  
7 study suggested that 1 day of live training in dermoscopy was sufficient to build the confidence  
8 of GPs with special interest in melanoma diagnosis.<sup>67</sup> Actually, we found two RCTs showing  
9 sustained improvement of the diagnostic accuracy of GPs proposing a live training in  
10 dermoscopy with a duration of 1 day to 10 hours, respectively.<sup>9,10</sup> The long duration of training  
11 in dermoscopy being a limiting factor for most GPs, it is important to keep in mind that training  
12 in clinical melanoma diagnosis also showed to improve the GPs' performances while requiring  
13 less training time (+/- 2.5h).<sup>34,48</sup>

### 23 **Long-term improvement of the GPs' performances in clinical settings**

24 The GPs' performances measured in clinical settings were assessed over the long term for 15  
25 educational programs: six in clinical diagnosis and nine in dermoscopic diagnosis. Ten showed  
26 a positive impact on the GPs' performances measured over periods ranging from 6 to 19  
27 months. Seven of these 10 trainings demonstrated sustainability of the GPs' acquired diagnostic  
28 skills measured in a training setting leading to changes in real-life practice. The studies mostly  
29 stated a decrease of referral rates to a dermatologist for benign skin lesions and an improvement  
30 of the benign/malignant ratio of excised skin lesions. Furthermore, a decrease of the incidence  
31 of advanced melanomas was shown in a French department over a 3-year period after their  
32 training program in clinical melanoma diagnosis.<sup>48</sup> The INFORMED group<sup>39</sup> also reported an  
33 increase in melanoma diagnosis during a screening program by GPs trained with their program  
34 in 2016.<sup>68</sup> Unfortunately, two educational programs<sup>25,26</sup> failed to maintain the GPs' acquired  
35 performances at 1 year after the end of the training. In contrast to other dermoscopy training  
36 programs, Badertscher *et al.*<sup>26</sup> used Lumio®, a polarized magnifying glass with 2x  
37 magnification (10x for standard dermoscopy device) to teach dermoscopy and teledermatology  
38 feedback as refresher training material. Concerning Markova *et al.*,<sup>25</sup> they chose to assess by  
39 interviews of patients the number of total-body skin examinations performed but did not  
40 evaluate the GPs' diagnostic accuracy.

41  
42  
43  
44  
45  
46  
47  
48  
49  
50  
51  
52  
53  
54  
55  
56  
57 To retain acquired diagnostic skills over the long term, a recent RCT, which failed to maintain  
58 the performances of trained internists at 12 months, suggested a need for "refresher sessions at  
59 regular intervals".<sup>69,70</sup> In this review, nine (60%) educational programs, which were evaluated  
60

1  
2  
3 in the long-term, provided refresher training material for their participating GPs. Seven of these  
4 programs were successful. In 2014, Grange *et al.*<sup>48</sup> furnished a CD-ROM containing the  
5 teaching material and sent regular information about melanoma to the GPs. The INFORMED  
6 group<sup>39</sup> provided GPs with a free unlimited access to their web-based course. Menzies *et al.*<sup>35</sup>  
7 gave the GPs an educational textbook and an unlimited e-learning access. Grimaldi *et al.*<sup>36</sup> and  
8 Youl *et al.*<sup>47</sup> also ensured self-assessment refresher training sessions. Marra *et al.*<sup>51</sup> found a 10-  
9 month sustainability of the diagnostic accuracy of their trained GPs and assumed that daily use  
10 of the obtained knowledge during the study period achieved this effect. Only Koelink *et al.*,<sup>10</sup>  
11 who evaluated the longest post-training period (19 months) demonstrating sustainability of  
12 diagnostic skills, did not specify whether update training modalities were provided.  
13  
14  
15  
16  
17  
18  
19  
20  
21

22 However, the ideal frequency and form of these updates have never been studied. A RCT, taking  
23 place in the English National Defibrillator Programme, determined that update session intervals  
24 after a medical education session should not exceed 7 months to limit the loss of acquired skills  
25 and maintain the participants confidence.<sup>71</sup> In the UK, a survey among GPs with special interest  
26 in dermatology stated that self-assessment learning was the most popular for refresher  
27 sessions.<sup>67</sup> Nevertheless, they also showed that 36% of GPs using dermoscopy in their clinical  
28 practice reported to never have updated their training skills. We found that the most appreciated  
29 form of self-assessment updates was unlimited access to an e-learning course. In the future, this  
30 craze for online training could lead to the development of smartphone applications to train GPs  
31 in melanoma diagnosis. Some newly developed applications have currently been evaluated  
32 among medical students<sup>72</sup> and dermatology residents.<sup>73</sup> Initial results already looked very  
33 promising.  
34  
35  
36  
37  
38  
39  
40  
41  
42  
43

#### 44 **Limitations**

45  
46 This scoping review has some limitations and led inevitably to certain publication bias. We  
47 used keywords for the selection of articles and only peer-reviewed articles were included. By  
48 limiting our research to English language articles, some studies may also have been missed. It  
49 is also very likely that melanoma diagnostic training programs exist in unpublished forms, for  
50 example in university continuing medical education programs. Moreover, we focused only on  
51 studies assessing melanoma diagnostic training methods among GPs. This way, some  
52 educational programs for primary care may not be mentioned in this review. Furthermore,  
53 educational programs, which were not evaluated in studies, were overlooked. Finally, this  
54 review covers educational programs over a 25-year period. As technology has evolved  
55  
56  
57  
58  
59  
60

1  
2  
3 considerably since then, some teaching methods and refresher training materials have for the  
4 most been overshadowed by interactive online tutorials (e-learning). This is all the truer since  
5 the health crisis caused by COVID-19 has allowed this distance learning method to develop  
6 very rapidly.  
7  
8  
9

## 10 **Conclusion**

11  
12 In conclusion, educational programs trained GPs in melanoma diagnosis using clinical  
13 examination alone, dermoscopy alone or clinical diagnosis followed by dermoscopy. Most  
14 reported programs that improved the long-term diagnostic accuracy and changed the daily-life  
15 performances of the GPs, i.e. decrease in dermatologist referral of benign skin lesions, and  
16 improvement of the benign/malignant ratio of excised skin lesions, trained their participating  
17 GPs in both methods. The preferred teaching method was live and e-learning but the teaching  
18 method did not seem to influence the GPs' acquired performances. It is important to note that  
19 the educational programs that achieved to maintain long term performances of the GPs in daily  
20 clinical practice included refresher training material. However, the optimal form and ideal  
21 frequency of these updates have yet to be defined.  
22  
23  
24  
25  
26  
27  
28  
29  
30  
31

## 32 **References**

- 33  
34 1. Petrie T, Samatham R, Witkowski AM, Esteva A, Leachman SA. Melanoma Early  
35 Detection: Big Data, Bigger Picture. *J Invest Dermatol*. 2019.  
36 doi:10.1016/j.jid.2018.06.187  
37
- 38  
39 2. Van Rijnsingen MCJ, Van Bon B, Van Der Wilt GJ, Lagro-Janssen ALM, Gerritsen  
40 MJP. The current and future role of general practitioners in skin cancer care: An  
41 assessment of 268 general practitioners. *Br J Dermatol*. 2014. doi:10.1111/bjd.12935  
42
- 43  
44 3. Buckley D, McMonagle C. Melanoma in primary care. The role of the general  
45 practitioner. *Ir J Med Sci*. 2014. doi:10.1007/s11845-013-1021-z  
46
- 47  
48 4. Grange F, Barbe C, Mas L, et al. The role of general practitioners in diagnosis of  
49 cutaneous melanoma: A population-based study in France. *Br J Dermatol*. 2012.  
50 doi:10.1111/j.1365-2133.2012.11178.x  
51
- 52  
53 5. Goulart JM, Quigley EA, Dusza S, et al. Skin cancer education for primary care  
54 physicians: A systematic review of published evaluated interventions. *J Gen Intern  
55 Med*. 2011. doi:10.1007/s11606-011-1692-y  
56
- 57  
58 6. Bakos RM, Blumetti TP, Roldán-Marín R, Salerni G. Noninvasive Imaging Tools in  
59 the Diagnosis and Treatment of Skin Cancers. *Am J Clin Dermatol*. 2018.  
60 doi:10.1007/s40257-018-0367-4



- 1
  - 2
  - 3
  - 4
  - 5
  - 6
  - 7
  - 8
  - 9
  - 10
  - 11
  - 12
  - 13
  - 14
  - 15
  - 16
  - 17
  - 18
  - 19
  - 20
  - 21
  - 22
  - 23
  - 24
  - 25
  - 26
  - 27
  - 28
  - 29
  - 30
  - 31
  - 32
  - 33
  - 34
  - 35
  - 36
  - 37
  - 38
  - 39
  - 40
  - 41
  - 42
  - 43
  - 44
  - 45
  - 46
  - 47
  - 48
  - 49
  - 50
  - 51
  - 52
  - 53
  - 54
  - 55
  - 56
  - 57
  - 58
  - 59
  - 60
7. Piccolo D, Ferrari A, Peris K, Daidone R, Ruggeri B, Chimenti S. Dermoscopic diagnosis by a trained clinician vs. a clinician with minimal dermoscopy training vs. computer-aided diagnosis of 341 pigmented skin lesions: A comparative study. *Br J Dermatol*. 2002. doi:10.1046/j.1365-2133.2002.04978.x
8. Dinnes J, Deeks JJ, Chuchu N, et al. Dermoscopy, with and without visual inspection, for diagnosing melanoma in adults. *Cochrane Database Syst Rev*. 2018. doi:10.1002/14651858.CD011902.pub2
9. Argenziano G, Puig S, Zalaudek I, et al. Dermoscopy improves accuracy of primary care physicians to triage lesions suggestive of skin cancer. *J Clin Oncol*. 2006. doi:10.1200/JCO.2005.05.0864
10. Koelink CJL, Vermeulen KM, Kollen BJ, et al. Diagnostic accuracy and cost-effectiveness of dermoscopy in primary care: a cluster randomized clinical trial. *J Eur Acad Dermatology Venereol*. 2014. doi:10.1111/jdv.12306
11. Jones OT, Jurascheck LC, Van Melle MA, et al. Dermoscopy for melanoma detection and triage in primary care: A systematic review. *BMJ Open*. 2019. doi:10.1136/bmjopen-2018-027529
12. Herschorn A. Dermoscopy for melanoma detection in family practice. *Can Fam Physician*. 2012.
13. Chia A, Trevena L. A Systematic Review of Training to Improve Melanoma Diagnostic Skills in General Practitioners. *J Cancer Educ*. 2016. doi:10.1007/s13187-015-0864-6
14. Fee JA, McGrady FP, Rosendahl C, Hart ND. Training Primary Care Physicians in Dermoscopy for Skin Cancer Detection: a Scoping Review. *J Cancer Educ*. 2019. doi:10.1007/s13187-019-01647-7
15. Tricco AC, Lillie E, Zarin W, et al. PRISMA extension for scoping reviews (PRISMA-ScR): Checklist and explanation. *Ann Intern Med*. 2018. doi:10.7326/M18-0850
16. Moore DE. How Physicians Learn and How to Design Learning Experiences for Them: An Approach Based on an Interpretive Review of Evidence. In: *Continuing Education in the Health Professions: Improving Healthcare through Lifelong Learning*. ; 2008.
17. Moher D, Liberati A, Tetzlaff J AD. PRISMA 2009 Flow Diagram. *Prism statement*. 2009. doi:10.1371/journal.pmed1000097
18. Dolan NC, Ng JS, Martin GJ, Robinson JK, Rademaker AW. Effectiveness of a skin cancer control educational intervention for internal medicine housestaff and attending physicians. *J Gen Intern Med*. 1997. doi:10.1046/j.1525-1497.1997.07106.x
19. Gerbert B, Bronstone A, Wolff M, et al. Improving primary care residents' proficiency in the diagnosis of skin cancer. *J Gen Intern Med*. 1998. doi:10.1046/j.1525-1497.1998.00024.x

- 1
  - 2
  - 3
  - 4
  - 5
  - 6
  - 7
  - 8
  - 9
  - 10
  - 11
  - 12
  - 13
  - 14
  - 15
  - 16
  - 17
  - 18
  - 19
  - 20
  - 21
  - 22
  - 23
  - 24
  - 25
  - 26
  - 27
  - 28
  - 29
  - 30
  - 31
  - 32
  - 33
  - 34
  - 35
  - 36
  - 37
  - 38
  - 39
  - 40
  - 41
  - 42
  - 43
  - 44
  - 45
  - 46
  - 47
  - 48
  - 49
  - 50
  - 51
  - 52
  - 53
  - 54
  - 55
  - 56
  - 57
  - 58
  - 59
  - 60
20. Westerhoff K, McCarthy WH, Menzies SW. Increase in the sensitivity for melanoma diagnosis by primary care physicians using skin surface microscopy. *Br J Dermatol*. 2000. doi:10.1046/j.1365-2133.2000.03836.x
21. Del Mar CB, Green AC. Aid to diagnosis of melanoma in primary medical care. *BMJ*. 1995. doi:10.1136/bmj.310.6978.492
22. English DR, Burton RC, Del Mar CB, Donovan RJ, Ireland PD, Emery G. Evaluation of aid to diagnosis of pigmented skin lesions in general practice: Controlled trial randomised by practice. *Br Med J*. 2003. doi:10.1136/bmj.327.7411.375
23. De Gannes GC, Ip JL, Martinka M, Crawford RI, Rivers JK. Early detection of skin cancer by family physicians: A pilot project. *J Cutan Med Surg*. 2004. doi:10.1177/120347540400800205
24. Raasch BA, Hays R, Buettner PG. An educational intervention to improve diagnosis and management of suspicious skin lesions. *J Contin Educ Health Prof*. 2000. doi:10.1002/chp.1340200108
25. Markova A, Weinstock MA, Risica P, et al. Effect of a web-based curriculum on primary care practice: Basic skin cancer triage trial. *Fam Med*. 2013.
26. Badertscher N, Tandjung R, Senn O, et al. A multifaceted intervention: no increase in general practitioners' competence to diagnose skin cancer (minSKIN) - randomized controlled trial. *J Eur Acad Dermatology Venerol*. 2015. doi:10.5167/uzh-102419
27. Gerbert B, Bronstone A, Maurer T, Berger T, McPhee SJ, Caspers N. The effectiveness of an Internet-based tutorial in improving primary care physicians' skin cancer triage skills. *J Cancer Educ*. 2002. doi:10.1080/08858190209528784
28. Bedlow AJ, Cliff S, Melia J, Moss SM, Seyant R, Harland CC. Impact of skin cancer education on general practitioners' diagnostic skills. *Clin Exp Dermatol*. 2000. doi:10.1046/j.1365-2230.2000.00590.x
29. Harris JM, Salasche SJ, Harris RB. Using the Internet to teach melanoma management guidelines to primary care physicians. *J Eval Clin Pract*. 1999. doi:10.1046/j.1365-2753.1999.00194.x
30. Harris JM, Salasche SJ, Harris RB. Can internet-based continuing medical education improve physicians' skin cancer knowledge and skills? *J Gen Intern Med*. 2001. doi:10.1046/j.1525-1497.2001.00615.x
31. Brochez L, Verhaeghe E, Bleyen L, Naeyaert JM. Diagnostic ability of general practitioners and dermatologists in discriminating pigmented skin lesions. *J Am Acad Dermatol*. 2001. doi:10.1067/mjd.2001.113442
32. Carli P, De Giorgi V, Crocetti E, Caldini L, Ressel C, Giannotti B. Diagnostic and referral accuracy of family doctors in melanoma screening: Effect of a short formal training. *Eur J Cancer Prev*. 2005. doi:10.1097/00008469-200502000-00007

- 1
- 2
- 3 33. Dolianitis C, Kelly J, Wolfe R, Simpson P. Comparative performance of 4 dermoscopic
- 4 algorithms by nonexperts for the diagnosis of melanocytic lesions. *Arch Dermatol.*
- 5 2005. doi:10.1001/archderm.141.8.1008
- 6
- 7
- 8 34. Peuvrel L, Quereux G, Jumbou O, Sassolas B, Lequeux Y, Dreno B. Impact of a
- 9 campaign to train general practitioners in screening for melanoma. *Eur J Cancer Prev.*
- 10 2009. doi:10.1097/CEJ.0b013e32831bc3b2
- 11
- 12
- 13 35. Menzies SW, Emery J, Staples M, et al. Impact of dermoscopy and short-term
- 14 sequential digital dermoscopy imaging for the management of pigmented lesions in
- 15 primary care: A sequential intervention trial. *Br J Dermatol.* 2009. doi:10.1111/j.1365-
- 16 2133.2009.09374.x
- 17
- 18
- 19 36. Grimaldi L, Silvestri A, Brandi C, et al. Digital epiluminescence dermoscopy for
- 20 pigmented cutaneous lesions, primary care physicians, and telediagnosis: a useful tool?
- 21 *J Plast Reconstr Aesthetic Surg.* 2009. doi:10.1016/j.bjps.2008.01.011
- 22
- 23
- 24 37. Shariff Z, Roshan A, Williams AM, Platt AJ. 2-Week wait referrals in suspected skin
- 25 cancer: Does an instructional module for general practitioners improve diagnostic
- 26 accuracy? *Surgeon.* 2010. doi:10.1016/j.surge.2010.03.004
- 27
- 28
- 29 38. Bourne P, Rosendahl C, Keir J, Cameron A. BLINCK—A diagnostic algorithm for
- 30 skin cancer diagnosis combining clinical features with dermatoscopy findings.
- 31 *Dermatol Pract Concept.* 2012. doi:10.5826/dpc.0202a12
- 32
- 33
- 34 39. Eide MJ, Asgari MM, Fletcher SW, et al. Effects on skills and practice from a web-
- 35 based skin cancer course for primary care providers. *J Am Board Fam Med.* 2013.
- 36 doi:10.3122/jabfm.2013.06.130108
- 37
- 38
- 39 40. Mikkilineni R, Weinstock MA, Goldstein MG, Dube CE, Rossi JS. Impact of the basic
- 40 skin cancer triage curriculum on providers' skin cancer control practices. *J Gen Intern*
- 41 *Med.* 2001. doi:10.1046/j.1525-1497.2001.00626.x
- 42
- 43
- 44 41. Mikkilineni R, Weinstock MA, Goldstein MG, Dube CE, Rossi JS. The impact of the
- 45 basic skin cancer triage curriculum on providers' skills, confidence, and knowledge in
- 46 skin cancer control. *Prev Med (Baltim).* 2002. doi:10.1006/pmed.2001.0961
- 47
- 48
- 49 42. Rogers T, Marino ML, Dusza SW, et al. A clinical aid for detecting skin cancer: The
- 50 triage amalgamated dermoscopic algorithm (TADA). *J Am Board Fam Med.* 2016.
- 51 doi:10.3122/jabfm.2016.06.160079
- 52
- 53
- 54 43. Secker LJ, Buis PAJ, Bergman W, Kukutsch NA. Effect of a dermoscopy training
- 55 course on the accuracy of primary care physicians in diagnosing pigmented lesions.
- 56 *Acta Derm Venereol.* 2017. doi:10.2340/00015555-2526
- 57
- 58
- 59 44. Beecher SM, Keogh C, Healy C. Dedicated general practitioner education sessions can
- 60 improve diagnostic capabilities and may have a positive effect on referral patterns for
- common skin lesions. *Ir J Med Sci.* 2018. doi:10.1007/s11845-018-1788-z

- 1
  - 2
  - 3
  - 4
  - 5
  - 6
  - 7
  - 8
  - 9
  - 10
  - 11
  - 12
  - 13
  - 14
  - 15
  - 16
  - 17
  - 18
  - 19
  - 20
  - 21
  - 22
  - 23
  - 24
  - 25
  - 26
  - 27
  - 28
  - 29
  - 30
  - 31
  - 32
  - 33
  - 34
  - 35
  - 36
  - 37
  - 38
  - 39
  - 40
  - 41
  - 42
  - 43
  - 44
  - 45
  - 46
  - 47
  - 48
  - 49
  - 50
  - 51
  - 52
  - 53
  - 54
  - 55
  - 56
  - 57
  - 58
  - 59
  - 60
45. Seiverling E V., Ahrns HT, Greene A, et al. Teaching benign skin lesions as a strategy to improve the triage amalgamated dermoscopic algorithm (TADA). *J Am Board Fam Med*. 2019. doi:10.3122/jabfm.2019.01.180049
46. Sawyers EA, Wigle DT, Marghoob AA, Blum A. Dermoscopy Training Effect on Diagnostic Accuracy of Skin Lesions in Canadian Family Medicine Physicians Using the Triage Amalgamated Dermoscopic Algorithm. *Dermatol Pract Concept*. 2020;10(2)(e2020035). doi:10.5826/dpc.1002a35
47. Youl PH, Raasch BA, Janda M, Aitken JF. The effect of an educational programme to improve the skills of general practitioners in diagnosing melanocytic/pigmented lesions. *Clin Exp Dermatol*. 2007. doi:10.1111/j.1365-2230.2007.02414.x
48. Grange F, Woronoff AS, Bera R, et al. Efficacy of a general practitioner training campaign for early detection of melanoma in France. *Br J Dermatol*. 2014. doi:10.1111/bjd.12585
49. Gulati A, Harwood CA, Rolph J, et al. Is an online skin cancer toolkit an effective way to educate primary care physicians about skin cancer diagnosis and referral? *J Eur Acad Dermatology Venereol*. 2015. doi:10.1111/jdv.13167
50. Girgis A, Sanson-Fisher RW, Howe C, Raffan B. A skin cancer training programme: evaluation of a postgraduate training for family doctors. *Med Educ*. 1995. doi:10.1111/j.1365-2923.1995.tb00027.x
51. Marra E, van Rijsingen MCJ, Alkemade JAC, et al. The effect of a dermato-oncologic training program on the diagnostic skills and quality of referrals for suspicious skin lesions by general practitioners. *Br J Dermatol*. 2020. doi:10.1111/bjd.19214
52. Augustsson A, Paoli J. Effects of a 1-Day Training Course in Dermoscopy Among General Practitioners. *Dermatol Pract Concept*. 2019;9(3):195-199. doi:10.5826/dpc.0903a04
53. Shaikh WR, Geller A, Alexander G, et al. Developing an interactive web-based learning program on skin cancer: The learning experiences of clinical educators. *J Cancer Educ*. 2012. doi:10.1007/s13187-012-0378-4
54. Badertscher N, Rosemann T, Tandjung R, Braun RP. MinSKIN Does a multifaceted intervention improve the competence in the diagnosis of skin cancer by general practitioners? Study protocol for a randomised controlled trial. *Trials*. 2011. doi:10.1186/1745-6215-12-165
55. Weinstock MA, Goldstein MG, Dubé CE, Rhodes AR, Sober AJ. Basic skin cancer triage for teaching melanoma detection. *J Am Acad Dermatol*. 1996. doi:10.1016/S0190-9622(96)90287-X
56. Friedman RJ, Rigel DS, Kopf AW. Early Detection of Malignant Melanoma: The Role of Physician Examination and Self-Examination of the Skin. *CA Cancer J Clin*. 1985.

- 1  
2  
3 doi:10.3322/canjclin.35.3.130  
4  
5 57. Menzies SW. A method for the diagnosis of primary cutaneous melanoma using  
6 surface microscopy. *Dermatol Clin*. 2001. doi:10.1016/S0733-8635(05)70267-9  
7  
8 58. Stolz W, Riemann A, Cagnetta AB, et al. ABCD rule of dermatoscopy: A new  
9 practical method for early recognition of malignant melanoma. *Eur J Dermatology*.  
10 1994.  
11  
12 59. Argenziano G, Fabbrocini G, Carli P, De Giorgi V, Sammarco E, Delfino M.  
13 Epiluminescence Microscopy for the Diagnosis of Doubtful Melanocytic Skin Lesions.  
14 *Arch Dermatol*. 1998. doi:10.1001/archderm.134.12.1563  
15  
16 60. Pagnanelli G, Soyer HP, Argenziano G, et al. Diagnosis of pigmented skin lesions by  
17 dermoscopy: Web-based training improves diagnostic performance of non-experts. *Br*  
18 *J Dermatol*. 2003. doi:10.1046/j.1365-2133.2003.05168.x  
19  
20 61. Soyer HP, Argenziano G, Zalaudek I, et al. Three-point checklist of dermoscopy: A  
21 new screening method for early detection of melanoma. *Dermatology*. 2004.  
22 doi:10.1159/000075042  
23  
24 62. Jaimes N, Marghoob AA. Triage Amalgamated Dermoscopic Algorithm. *J Am Acad*  
25 *Dermatol*. 2020. doi:10.1016/j.jaad.2020.01.079  
26  
27 63. Rogers T, Marino M, Dusza S, Bajaj S, Marchetti M, Marghoob A. Triage  
28 amalgamated dermoscopic algorithm (TADA) for skin cancer screening. *Dermatol*  
29 *Pract Concept*. 2017. doi:10.5826/dpc.0702a09  
30  
31 64. Chappuis P, Duru G, Marchal O, Girier P, Dalle S, Thomas L. Dermoscopy, a useful  
32 tool for general practitioners in melanoma screening: a nationwide survey. *Br J*  
33 *Dermatol*. 2016. doi:10.1111/bjd.14495  
34  
35 65. Oliveria SA, Heneghan MK, Cushman LF, Ughetta EA, Halpern AC. Skin cancer  
36 screening by dermatologists, family practitioners, and internists: Barriers and  
37 facilitating factors. *Arch Dermatol*. 2011. doi:10.1001/archdermatol.2010.414  
38  
39 66. Kittler H, Pehamberger H, Wolff K, Binder M. Diagnostic accuracy of dermoscopy.  
40 *Lancet Oncol*. 2002. doi:10.1016/S1470-2045(02)00679-4  
41  
42 67. Jones OT, Jurascheck LC, Utukuri M, Pannebakker MM, Emery J, Walter FM.  
43 Dermoscopy use in UK primary care: a survey of GPs with a special interest in  
44 dermatology. *J Eur Acad Dermatology Venereol*. 2019. doi:10.1111/jdv.15614  
45  
46 68. Weinstock MA, Ferris LK, Saul MI, et al. Downstream consequences of melanoma  
47 screening in a community practice setting: First results. *Cancer*. 2016.  
48 doi:10.1002/cncr.30177  
49  
50 69. Robinson JK, Jain N, Marghoob AA, et al. A Randomized Trial on the Efficacy of  
51 Mastery Learning for Primary Care Provider Melanoma Opportunistic Screening Skills  
52  
53  
54  
55  
56  
57  
58  
59  
60

- 1  
2  
3 and Practice. *J Gen Intern Med*. 2018. doi:10.1007/s11606-018-4311-3  
4
- 5 70. Robinson JK, MacLean M, Reavy R, Turrisi R, Mallett K, Martin GJ. Dermoscopy of  
6 Concerning Pigmented Lesions and Primary Care Providers' Referrals at Intervals  
7 After Randomized Trial of Mastery Learning. *J Gen Intern Med*. 2018.  
8 doi:10.1007/s11606-018-4419-5  
9
- 10  
11 71. Woollard M, Whitfield R, Newcombe RG, Colquhoun M, Vetter N, Chamberlain D.  
12 Optimal refresher training intervals for AED and CPR skills: A randomised controlled  
13 trial. *Resuscitation*. 2006. doi:10.1016/j.resuscitation.2006.04.005  
14
- 15  
16 72. Lacy FA, Coman GC, Holliday AC, Kolodney MS. Assessment of smartphone  
17 application for teaching intuitive visual diagnosis of melanoma. *JAMA Dermatology*.  
18 2018. doi:10.1001/jamadermatol.2018.1525  
19
- 20  
21 73. Nelson KC, Gershenwald JE, Savory SA, et al. Telementoring and smartphone-based  
22 answering systems to optimize dermatology resident dermoscopy education. *J Am*  
23 *Acad Dermatol*. 2019. doi:10.1016/j.jaad.2019.01.045  
24  
25  
26  
27  
28  
29  
30  
31  
32  
33  
34  
35  
36  
37  
38  
39  
40  
41  
42  
43  
44  
45  
46  
47  
48  
49  
50  
51  
52  
53  
54  
55  
56  
57  
58  
59  
60

**Table 1. Inclusion and exclusion criteria for article selection**

|                                                                                                                                                                                                                                                                                                                                                                                                                                                                                                                                                                                                                                                                                                                                                                        |
|------------------------------------------------------------------------------------------------------------------------------------------------------------------------------------------------------------------------------------------------------------------------------------------------------------------------------------------------------------------------------------------------------------------------------------------------------------------------------------------------------------------------------------------------------------------------------------------------------------------------------------------------------------------------------------------------------------------------------------------------------------------------|
| <p><b>Inclusion criteria:</b></p> <p><b>Articles</b></p> <ul style="list-style-type: none"> <li>Articles written in English</li> <li>Study articles and descriptive articles of educational programs</li> </ul> <p><b>Population</b></p> <ul style="list-style-type: none"> <li>Qualified GPs and GP trainees working in community settings</li> </ul> <p><b>Intervention</b></p> <ul style="list-style-type: none"> <li>Studies evaluating educational programs in clinical (naked eye) diagnosis and/or diagnosis of melanoma using dermoscopy</li> </ul> <p><b>Outcome(s)</b></p> <ul style="list-style-type: none"> <li>Studies assessing the type of educational program and its short and/or the long-term efficacy on the skills acquired by the GPs</li> </ul> |
| <p><b>Exclusion criteria:</b></p> <p><b>Articles</b></p> <ul style="list-style-type: none"> <li>Articles not subject to peer review and written in languages other than English</li> </ul> <p><b>Population</b></p> <ul style="list-style-type: none"> <li>Studies involving specialists, medical students, non-GPs, GPs working in hospital settings and/or specialized skin cancer clinics</li> </ul> <p><b>Intervention</b></p> <ul style="list-style-type: none"> <li>Studies evaluating exclusively nonmelanoma skin cancer</li> <li>Teledermoscopy studies</li> <li>Studies on computer-aided diagnosis of melanoma</li> </ul> <p><b>Outcome(s)</b></p> <ul style="list-style-type: none"> <li>No method of measuring outcomes was ruled out</li> </ul>          |

*Key: GPs= general practitioners*

**Table 2. Definition of study categories**

| Criteria                           | Categories               | Definition                                                                                                                                                                                                                                                                                                  |
|------------------------------------|--------------------------|-------------------------------------------------------------------------------------------------------------------------------------------------------------------------------------------------------------------------------------------------------------------------------------------------------------|
| <b>Training content</b>            | Epidemiology             | Background information on rates of melanoma cancer, risk factors, localization and evolution of melanomas                                                                                                                                                                                                   |
|                                    | Clinical diagnosis       | Naked eye melanoma recognition                                                                                                                                                                                                                                                                              |
|                                    | Clinical algorithm       | Use of a pre-existing algorithm as a learning tool to aid for clinical diagnosis                                                                                                                                                                                                                            |
|                                    | Dermoscopic diagnosis    | Recognition of melanoma using dermoscopy                                                                                                                                                                                                                                                                    |
|                                    | Dermoscopic algorithm    | Use of an algorithm as a learning tool to aid for dermoscopic diagnosis                                                                                                                                                                                                                                     |
|                                    | Management               | Determination of a plan of action for a skin lesion i.e. reassurance, follow-up, or lesion excision                                                                                                                                                                                                         |
| <b>Teaching method</b>             | Live                     | Presentation by a speaker to a group of participants                                                                                                                                                                                                                                                        |
|                                    | Scientific literature    | Use of educational books, posters, letters, CD-ROMs or videos                                                                                                                                                                                                                                               |
|                                    | E-learning               | Interactive online tutorials including audio and visual information                                                                                                                                                                                                                                         |
|                                    | Self-assessment          | Learning by the participant himself using educational material                                                                                                                                                                                                                                              |
| <b>Refresher training material</b> | Teledermatology feedback | Feedback from a dermatologist on the image and clinical history of a suspicious lesion at a distance, using remote internet-based technologies                                                                                                                                                              |
| <b>Outcome measures</b>            | Competences              | Acquired skills, which are evaluated in a training setting on clinical and/or dermoscopic photographs of skin lesions                                                                                                                                                                                       |
|                                    | Diagnostic accuracy      | Ability of the participants to discriminate between melanoma and benign lesions                                                                                                                                                                                                                             |
|                                    | Knowledge                | Report of conceptual understanding                                                                                                                                                                                                                                                                          |
|                                    | Appropriate management   | Determination of the right plan of action for a skin lesion                                                                                                                                                                                                                                                 |
|                                    | Performances             | Changes in real-life practice measured in a clinical setting, i.e. changes in the benign/malignant ratio of excised lesions, the number of total-body skin examinations performed, confidence of the GPs, changes in referral rates to a dermatologist, and decrease in the incidence of advanced melanomas |
| <b>Evaluation</b>                  | Short-term               | Measurement of outcomes immediately or up to 3 months after the training                                                                                                                                                                                                                                    |
|                                    | Long-term                | Measurement of outcomes at $\geq 6$ months after the training                                                                                                                                                                                                                                               |



**Table 3. Characteristics of educational programs in melanoma diagnosis for general practitioners**

| Article                                                  | Study design       | Study participants       | Training content |                    |                    |                       |                       |            | Teaching method                 | Training duration                    | Refresher training material |
|----------------------------------------------------------|--------------------|--------------------------|------------------|--------------------|--------------------|-----------------------|-----------------------|------------|---------------------------------|--------------------------------------|-----------------------------|
|                                                          |                    |                          | Epidemiology     | Clinical diagnosis | Clinical algorithm | Dermoscopic diagnosis | Dermoscopic algorithm | Management |                                 |                                      |                             |
| Marra, 2020, The Netherlands <sup>51</sup>               | Case-control study | 185 (83; 102)*           |                  | X                  |                    | X (optional)          |                       | X          | e-learning                      | 2h                                   |                             |
| Sawyers, 2020, Canada <sup>46</sup>                      | DA study           | 33 GPs                   |                  |                    |                    | X                     | TADA step-I           |            | Live                            | 3.5h                                 |                             |
| Augustsson, 2019, Sweden <sup>52</sup>                   | Case-control study | 43 GPs (27;16)*          |                  |                    |                    | X                     | Pattern analysis      |            | Live                            | 1-day                                | PDF-files of the course     |
| Seiverling, 2019, USA <sup>45</sup>                      | DA study           | 59 GPs                   |                  | X                  |                    | X                     | TADA                  |            | Live                            | 75min                                |                             |
| Beecher, 2018, Ireland <sup>44</sup>                     | DA study           | 23 GP trainees           | X                | X                  |                    |                       |                       | X          | Live, Literature                | 1h                                   |                             |
| Secker, 2017, The Netherlands <sup>43</sup>              | DA study           | 293 PCPs including ? GPs |                  | X                  |                    | X                     |                       | X          | Live, Literature and E-learning | 1-day                                |                             |
| Rogers, 2016, USA <sup>42</sup>                          | DA study           | 16 GPs                   |                  |                    |                    | X                     | TADA                  |            | Live                            | 1-day                                |                             |
| Badertscher, 2011 and 2015, Switzerland <sup>54,26</sup> | RCT                | 78 GPs (39;39)*          |                  | X                  |                    | Lumio®                |                       |            | Live                            | 1-day                                | Teledermatology feedback    |
| Gulati, 2015, UK <sup>49</sup>                           | Cohort study       | 967 GPs                  | X                | X                  |                    |                       |                       | X          | E-learning                      | PD                                   |                             |
| Koelink, 2014, The Netherlands <sup>10</sup>             | RCT                | 53 GPs                   | X                | X                  |                    | X                     | 7-point checklist     |            | Live                            | 4h clinical diagnosis; 6h dermoscopy |                             |

|                                                                                                                        |                     |                               |   |   |                              |                                     |                                                   |   |                                   |                       |                                               |
|------------------------------------------------------------------------------------------------------------------------|---------------------|-------------------------------|---|---|------------------------------|-------------------------------------|---------------------------------------------------|---|-----------------------------------|-----------------------|-----------------------------------------------|
| Grange, 2013, France <sup>48</sup>                                                                                     | Cohort study        | 398 GPs                       | X | X |                              |                                     |                                                   |   | Live, Literature                  | 2.5h                  | CD-ROM+ regular information sheets            |
| Markova, 2013, USA <sup>25</sup><br>Mikkilineni, 2001 and 2002, USA <sup>40,41</sup><br>(Weinstock 1996) <sup>55</sup> | RCT<br><br>DA study | 46 GPs (20;26)*<br><br>7 GPs  | X | X | ABCD(E)                      |                                     |                                                   | X | E-learning<br><br>Live Literature | <br><br>2h            |                                               |
| Eide, 2013, <sup>39</sup> (Shaikh, 2012) <sup>53</sup><br>INFORMED                                                     | DA study            | 54 PCPs including 9 GPs (20%) | X | X | ABCD(E) + Ugly duckling sign | X                                   | Three-point checklist                             | X | E-learning, Self-assessment       | 2h web-based learning | Unlimited e-learning access                   |
| Bourne, 2012, Australia <sup>38</sup>                                                                                  | DA study            | 3 GPs                         |   | X |                              | X                                   | BLINCK<br>Three-point checklist<br>Menzies method |   | Live, Literature                  | UD                    |                                               |
| Shariff, 2010, UK <sup>37</sup>                                                                                        | DA study            | 94 GPs                        |   | X |                              |                                     |                                                   |   | Literature                        | PD                    |                                               |
| Grimaldi, 2009, Italy <sup>36</sup>                                                                                    | DA study            | 13 GPs                        |   | X |                              | X                                   | ABCD rule                                         |   | Live, E-learning, Self-assessment | PD                    | Self-assessment e-learning training sessions  |
| Menzies, 2009, Australia <sup>35</sup>                                                                                 | DA study            | 63 GPs                        |   | X |                              | Yes + Sequential digital dermoscopy | Menzies method                                    |   | Live, Literature, E-learning      | 2h-workshop           | Unlimited e-learning access                   |
| Peuvrel, 2009, France <sup>34</sup>                                                                                    | DA study            | 210 GPs                       | X | X | ABCD(E)                      |                                     |                                                   | X | Live, Literature (CD-ROM)         | 2h                    | CD-ROM                                        |
| Youl, 2007, Australia <sup>47</sup>                                                                                    | Cohort study        | 16 GPs                        | X | X | ABCD(E)                      | X                                   |                                                   | X | Literature                        | PD                    | Self-assessment paper-based training sessions |

|    |                                                      |             |                       |   |                                      |                                         |   |                                                                               |                                                   |         |                                                |
|----|------------------------------------------------------|-------------|-----------------------|---|--------------------------------------|-----------------------------------------|---|-------------------------------------------------------------------------------|---------------------------------------------------|---------|------------------------------------------------|
| 1  |                                                      |             |                       |   |                                      |                                         |   |                                                                               |                                                   |         |                                                |
| 2  |                                                      |             |                       |   |                                      |                                         |   |                                                                               |                                                   |         |                                                |
| 3  | Raasch, 2000,<br>Australia <sup>24</sup>             | RCT         | 46 GPs<br>(23;23)*    |   |                                      |                                         |   |                                                                               |                                                   |         |                                                |
| 4  | Argenziano,<br>2006, Italy and<br>Spain <sup>9</sup> | RCT         | 73 GPs<br>(36;37)*    |   | X                                    | ABCD                                    | X | Three-point<br>checklist                                                      | Live                                              | 1-day   |                                                |
| 5  |                                                      |             |                       |   |                                      |                                         |   |                                                                               |                                                   |         |                                                |
| 6  | Dolianitis,<br>2005,<br>Australia <sup>33</sup>      | DA<br>study | 35 GPs                |   |                                      |                                         | X | Menzies<br>method<br>7-point<br>checklist<br>ABCD rule<br>Pattern<br>analysis | Literature,<br>E-learning,<br>Self-<br>assessment | PD      |                                                |
| 7  |                                                      |             |                       |   |                                      |                                         |   |                                                                               |                                                   |         |                                                |
| 8  |                                                      |             |                       |   |                                      |                                         |   |                                                                               |                                                   |         |                                                |
| 9  |                                                      |             |                       |   |                                      |                                         |   |                                                                               |                                                   |         |                                                |
| 10 |                                                      |             |                       |   |                                      |                                         |   |                                                                               |                                                   |         |                                                |
| 11 |                                                      |             |                       |   |                                      |                                         |   |                                                                               |                                                   |         |                                                |
| 12 |                                                      |             |                       |   |                                      |                                         |   |                                                                               |                                                   |         |                                                |
| 13 |                                                      |             |                       |   |                                      |                                         |   |                                                                               |                                                   |         |                                                |
| 14 |                                                      |             |                       |   |                                      |                                         |   |                                                                               |                                                   |         |                                                |
| 15 |                                                      |             |                       |   |                                      |                                         |   |                                                                               |                                                   |         |                                                |
| 16 | Carli, 2005,<br>Italy <sup>32</sup>                  | DA<br>study | 41 GPs                | X | X                                    | ABCD(E)                                 |   | X                                                                             | Live                                              | 4h      |                                                |
| 17 |                                                      |             |                       |   |                                      |                                         |   |                                                                               |                                                   |         |                                                |
| 18 | De Gannes,<br>2004, Canada <sup>23</sup>             | RCT         | 27 GPs<br>(10;17)*    | X | X                                    |                                         |   |                                                                               | Literature<br>(Video-<br>format)                  | 12min   | Unlimited access<br>to the 12-<br>minute Video |
| 19 |                                                      |             |                       |   |                                      |                                         |   |                                                                               |                                                   |         |                                                |
| 20 |                                                      |             |                       |   |                                      |                                         |   |                                                                               |                                                   |         |                                                |
| 21 | English, 2003,<br>Australia <sup>22</sup>            | RCT         | 468 GPs<br>(245;228)* |   | X +<br>Polaroid<br>instant<br>camera |                                         |   | X                                                                             | Literature                                        | >6h     |                                                |
| 22 |                                                      |             |                       |   |                                      |                                         |   |                                                                               |                                                   |         |                                                |
| 23 |                                                      |             |                       |   |                                      |                                         |   |                                                                               |                                                   |         |                                                |
| 24 | Del Mar, 1995,<br>Australia <sup>21</sup>            | RCT         | 93 GPs<br>(48;45)*    |   |                                      |                                         |   |                                                                               |                                                   | 1h      |                                                |
| 25 |                                                      |             |                       |   |                                      |                                         |   |                                                                               |                                                   |         |                                                |
| 26 |                                                      |             |                       |   |                                      |                                         |   |                                                                               |                                                   |         |                                                |
| 27 | Brochez, 2001,<br>Belgium <sup>31</sup>              | DA<br>study | 146 GPs               | X | X                                    |                                         |   | X                                                                             | Live,<br>Literature                               | 2h      |                                                |
| 28 |                                                      |             |                       |   |                                      |                                         |   |                                                                               |                                                   |         |                                                |
| 29 | Harris, 1999<br>and 2001,<br>USA <sup>29,30</sup>    | DA<br>study | 232 GPs<br><br>17 GPs | X | X                                    | ABCD<br>7-point<br>Glasgow<br>checklist |   | X                                                                             | Literature,<br>E-learning                         | 1h      |                                                |
| 30 |                                                      |             |                       |   |                                      |                                         |   |                                                                               |                                                   |         |                                                |
| 31 |                                                      |             |                       |   |                                      |                                         |   |                                                                               |                                                   |         |                                                |
| 32 |                                                      |             |                       |   |                                      |                                         |   |                                                                               |                                                   |         |                                                |
| 33 | Westerhoff,<br>Australia 2000<br><sup>20</sup>       | RCT         | 74 GPs                |   |                                      |                                         | X | Menzies<br>method                                                             | Live,<br>Literature                               | 1h live |                                                |
| 34 |                                                      |             |                       |   |                                      |                                         |   |                                                                               |                                                   |         |                                                |
| 35 |                                                      |             |                       |   |                                      |                                         |   |                                                                               |                                                   |         |                                                |
| 36 | Bedlow, 2000,<br>UK <sup>28</sup>                    | DA<br>study | 17 GPs                |   | X                                    |                                         |   |                                                                               | Live,<br>Literature                               | UD      |                                                |
| 37 |                                                      |             |                       |   |                                      |                                         |   |                                                                               |                                                   |         |                                                |
| 38 |                                                      |             |                       |   |                                      |                                         |   |                                                                               |                                                   |         |                                                |
| 39 |                                                      |             |                       |   |                                      |                                         |   |                                                                               |                                                   |         |                                                |
| 40 |                                                      |             |                       |   |                                      |                                         |   |                                                                               |                                                   |         |                                                |
| 41 |                                                      |             |                       |   |                                      |                                         |   |                                                                               |                                                   |         |                                                |
| 42 |                                                      |             |                       |   |                                      |                                         |   |                                                                               |                                                   |         |                                                |
| 43 |                                                      |             |                       |   |                                      |                                         |   |                                                                               |                                                   |         |                                                |
| 44 |                                                      |             |                       |   |                                      |                                         |   |                                                                               |                                                   |         |                                                |
| 45 |                                                      |             |                       |   |                                      |                                         |   |                                                                               |                                                   |         |                                                |
| 46 |                                                      |             |                       |   |                                      |                                         |   |                                                                               |                                                   |         |                                                |

|                                              |                    |                                   |   |   |  |  |  |   |                              |     |  |
|----------------------------------------------|--------------------|-----------------------------------|---|---|--|--|--|---|------------------------------|-----|--|
| Gerbert, 1998 and 2002, USA <sup>19,27</sup> | RCT                | 52 GPs (26;26)*                   | X | X |  |  |  | X | Live, Literature, E-learning | >3h |  |
| Dolan, 1997, USA <sup>18</sup>               | RCT                | 82 PCPs including 16 GPs (46;36)* | X | X |  |  |  |   | Live                         | 2h  |  |
| Girgis, 1995, Australia <sup>50</sup>        | Case-control study | 41 GPs (24;17)*                   | X | X |  |  |  | X | Live, literature             | >6h |  |

Key: GPs=general practitioners; PCPs= primary care physicians; RCT= randomized controlled trial; DA= diagnostic accuracy; INFORMED= Internet curriculum for melanoma early detection; PD= participant dependent; UD=undisclosed; TADA=trriage amalgamated dermoscopic algorithm

\*number of participants in the intervention group and control group

**Table 4. Outcome measures of the melanoma diagnostic educational programs for general practitioners.**

| <b>A. Studies with short-term outcomes</b>      |                                         |           |    |                                          |      |    |            |                           |    |                           |            |             |
|-------------------------------------------------|-----------------------------------------|-----------|----|------------------------------------------|------|----|------------|---------------------------|----|---------------------------|------------|-------------|
| Studies<br>(1st author and year of publication) | Measured competence in training setting |           |    | Measured performance in clinical setting |      |    |            |                           |    | Timing after the training |            |             |
|                                                 | DA                                      | Knowledge | AM | B/M lesion ratio                         | TBSE | DA | confidence | Decrease of VTM incidence | RR | immediately               | at 1 month | at 3 months |
| <b>Dermoscopic diagnostic training programs</b> |                                         |           |    |                                          |      |    |            |                           |    |                           |            |             |
| Sawyers 2020 <sup>46</sup>                      | +                                       |           |    |                                          |      |    |            |                           |    | X                         |            |             |
| Seiverling 2019 <sup>45</sup>                   | +                                       |           |    |                                          |      |    |            |                           |    | X                         |            |             |
| Secker 2017 <sup>43</sup>                       | +                                       |           | +  |                                          |      |    |            |                           |    |                           |            | X           |
| Rogers 2016 <sup>42</sup>                       | +                                       |           |    |                                          |      |    |            |                           |    | X                         |            |             |
| Bourne 2012 <sup>38</sup>                       | +                                       |           |    |                                          |      |    |            |                           |    | X                         |            |             |
| Dolianitis 2005 <sup>33</sup>                   | +                                       |           |    |                                          |      |    |            |                           |    | X                         |            |             |
| Westerhoff 2000 <sup>20</sup>                   | +                                       | +         |    |                                          |      |    |            |                           |    | X                         |            |             |
| <b>Clinical diagnostic training programs</b>    |                                         |           |    |                                          |      |    |            |                           |    |                           |            |             |
| Beecher, 2018 <sup>44</sup>                     | +                                       | +         | +  |                                          |      |    |            |                           |    | X                         |            | X           |
| Carli 2005 <sup>32</sup>                        | +                                       |           | +  |                                          |      |    |            |                           |    | X                         |            |             |
| Mikkilineni 2001;2002 <sup>32,33</sup>          |                                         | +         | +  |                                          | +    |    | +          |                           |    | X                         |            |             |
| Brochez 2001 <sup>31</sup>                      | +                                       |           |    |                                          |      |    |            |                           |    | X                         |            |             |
| Harris 2001 <sup>30</sup>                       | +                                       | +         | +  |                                          |      |    | +          |                           |    | X                         |            |             |
| Harris 1999 <sup>29</sup>                       | +                                       | -         | +  |                                          |      |    | +          |                           |    | X                         |            |             |
| Raasch 2000 <sup>26</sup>                       | -                                       |           |    |                                          |      |    | +          |                           |    | 3-month period            |            |             |
| Bedlow 2000 <sup>28</sup>                       | +                                       | +         |    |                                          |      |    |            |                           |    | X                         |            |             |
| Gerbert 1998;2002 <sup>19,27</sup>              | +                                       | +         | +  |                                          |      |    | +          |                           |    | X                         |            |             |
| Dolan 1997 <sup>18</sup>                        | -                                       | +         | -  |                                          |      |    |            |                           |    | X                         | X          |             |

| Girgis 1995 <sup>50</sup>                           | -                                       |           | +  |                                          |               |                                          |            | +                         |            |                           | X                         |                                          | X            |              |
|-----------------------------------------------------|-----------------------------------------|-----------|----|------------------------------------------|---------------|------------------------------------------|------------|---------------------------|------------|---------------------------|---------------------------|------------------------------------------|--------------|--------------|
| <b>B. Studies with long-term outcomes</b>           |                                         |           |    |                                          |               |                                          |            |                           |            |                           |                           |                                          |              |              |
| Studies                                             | Measured competence in training setting |           |    | Measured performance in clinical setting |               |                                          |            |                           |            |                           | Timing after the training |                                          |              |              |
|                                                     | DA                                      | Knowledge | AM | M/B lesion ratio                         | TBSE          | DA                                       | Confidence | Decrease of VTM incidence | RR         |                           |                           |                                          |              |              |
| <b>Dermoscopic diagnostic training programs</b>     |                                         |           |    |                                          |               |                                          |            |                           |            |                           |                           |                                          |              |              |
| Shariff 2010 <sup>37</sup>                          |                                         |           |    |                                          |               | -                                        |            |                           |            |                           |                           | at 11 months                             |              |              |
| Youl 2007 <sup>47</sup>                             |                                         |           |    | +                                        |               | +                                        |            |                           |            |                           |                           | 6-month period                           |              |              |
| Argenziano 2006 <sup>9</sup>                        |                                         |           |    |                                          |               | +                                        |            |                           |            |                           | +                         | 16-month period                          |              |              |
| <b>Clinical diagnostic training programs</b>        |                                         |           |    |                                          |               |                                          |            |                           |            |                           |                           |                                          |              |              |
| Gulati 2015 <sup>49</sup>                           |                                         |           |    |                                          |               | -                                        | +          |                           |            |                           |                           | 8-month period                           |              |              |
| Peuvrel 2009 <sup>34</sup>                          |                                         |           | +  |                                          |               |                                          | +          |                           |            |                           |                           | 15-month period                          |              |              |
| De Gannes 2004 <sup>23</sup>                        | -                                       | -         | -  |                                          |               |                                          |            |                           |            |                           |                           | at 6 months                              |              |              |
| English 2003 <sup>22</sup>                          |                                         |           |    | -                                        |               |                                          |            |                           |            |                           |                           | 21-month period                          |              |              |
| Del Mar 1995 <sup>21</sup>                          |                                         |           |    | +                                        |               |                                          |            |                           |            |                           |                           | 24-month period                          |              |              |
| <b>C. Studies with short and long-term outcomes</b> |                                         |           |    |                                          |               |                                          |            |                           |            |                           |                           |                                          |              |              |
| Studies                                             | Measured competence in training setting |           |    | Timing after the training                |               | Measured performance in clinical setting |            |                           |            |                           |                           | Timing after the training                |              |              |
|                                                     | DA                                      | Knowledge | AM | Immediately after                        | at 1-3 months | B/M lesion ratio                         | TBSE       | DA                        | Confidence | Decrease of VTM incidence | RR                        |                                          |              |              |
| <b>Dermoscopic diagnostic training programs</b>     |                                         |           |    |                                          |               |                                          |            |                           |            |                           |                           |                                          |              |              |
| Augustsson 2019 <sup>52</sup>                       | +                                       |           |    | X                                        |               |                                          |            |                           |            |                           |                           | at 6 months<br>(here competence measure) |              |              |
| Badertsche r2015 <sup>26</sup>                      | +                                       |           |    | X                                        |               |                                          |            | -                         | +          |                           |                           | at 12 months                             |              |              |
| Koelink 2014 <sup>10</sup>                          | +                                       |           | +  | X                                        |               |                                          |            | +                         | +          |                           |                           | at 8 months                              | at 12 months | at 19 months |
| Eide 2013 <sup>39</sup>                             | +                                       | +         | +  | X                                        |               |                                          |            | +                         | +          |                           | +                         | at 6 months                              |              |              |

|                                                                |                                                                                                                                 |   |  |  |   |   |   |  |   |   |  |   |                                               |
|----------------------------------------------------------------|---------------------------------------------------------------------------------------------------------------------------------|---|--|--|---|---|---|--|---|---|--|---|-----------------------------------------------|
| 1<br>2<br>3<br>4<br>5<br>6<br>7<br>8                           | Youl 2007 <sup>46</sup><br>Raasch 2000 <sup>24</sup>                                                                            | - |  |  |   |   | + |  | + |   |  |   | 6-month period                                |
| 9<br>10<br>11<br>12<br>13                                      | Grimaldi 2009 <sup>36</sup><br>Menzies 2009 <sup>35</sup>                                                                       | + |  |  | X | X |   |  | + |   |  |   | 6-month period                                |
| 14                                                             | <b>Clinical diagnostic training programs</b>                                                                                    |   |  |  |   |   |   |  |   |   |  |   |                                               |
| 15<br>16<br>17<br>18<br>19<br>20<br>21<br>22<br>23<br>24<br>25 | Marra, 2020 <sup>51</sup><br>Grange 2013 <sup>48</sup><br>Markova 2013 <sup>25</sup><br>Mikkilineni 2001; 2002 <sup>40,41</sup> | + |  |  |   | X |   |  | + | + |  | + | at 10 months<br>3-year period<br>at 12 months |

26 *Key: DA= diagnostic accuracy; AM=appropriate management; TBSE= total body skin examination; B/M=benign/malignant; VTM= very thick melanomas; RR=*  
 27 *decrease in dermatologist referral rates for benign lesions and increase in referral rates for malignant lesions*  
 28 *'+'= statistically significant improvement; '-'= no statistically significant improvement*

**Figure 1.** PRISMA flowchart of study selection process<sup>17</sup>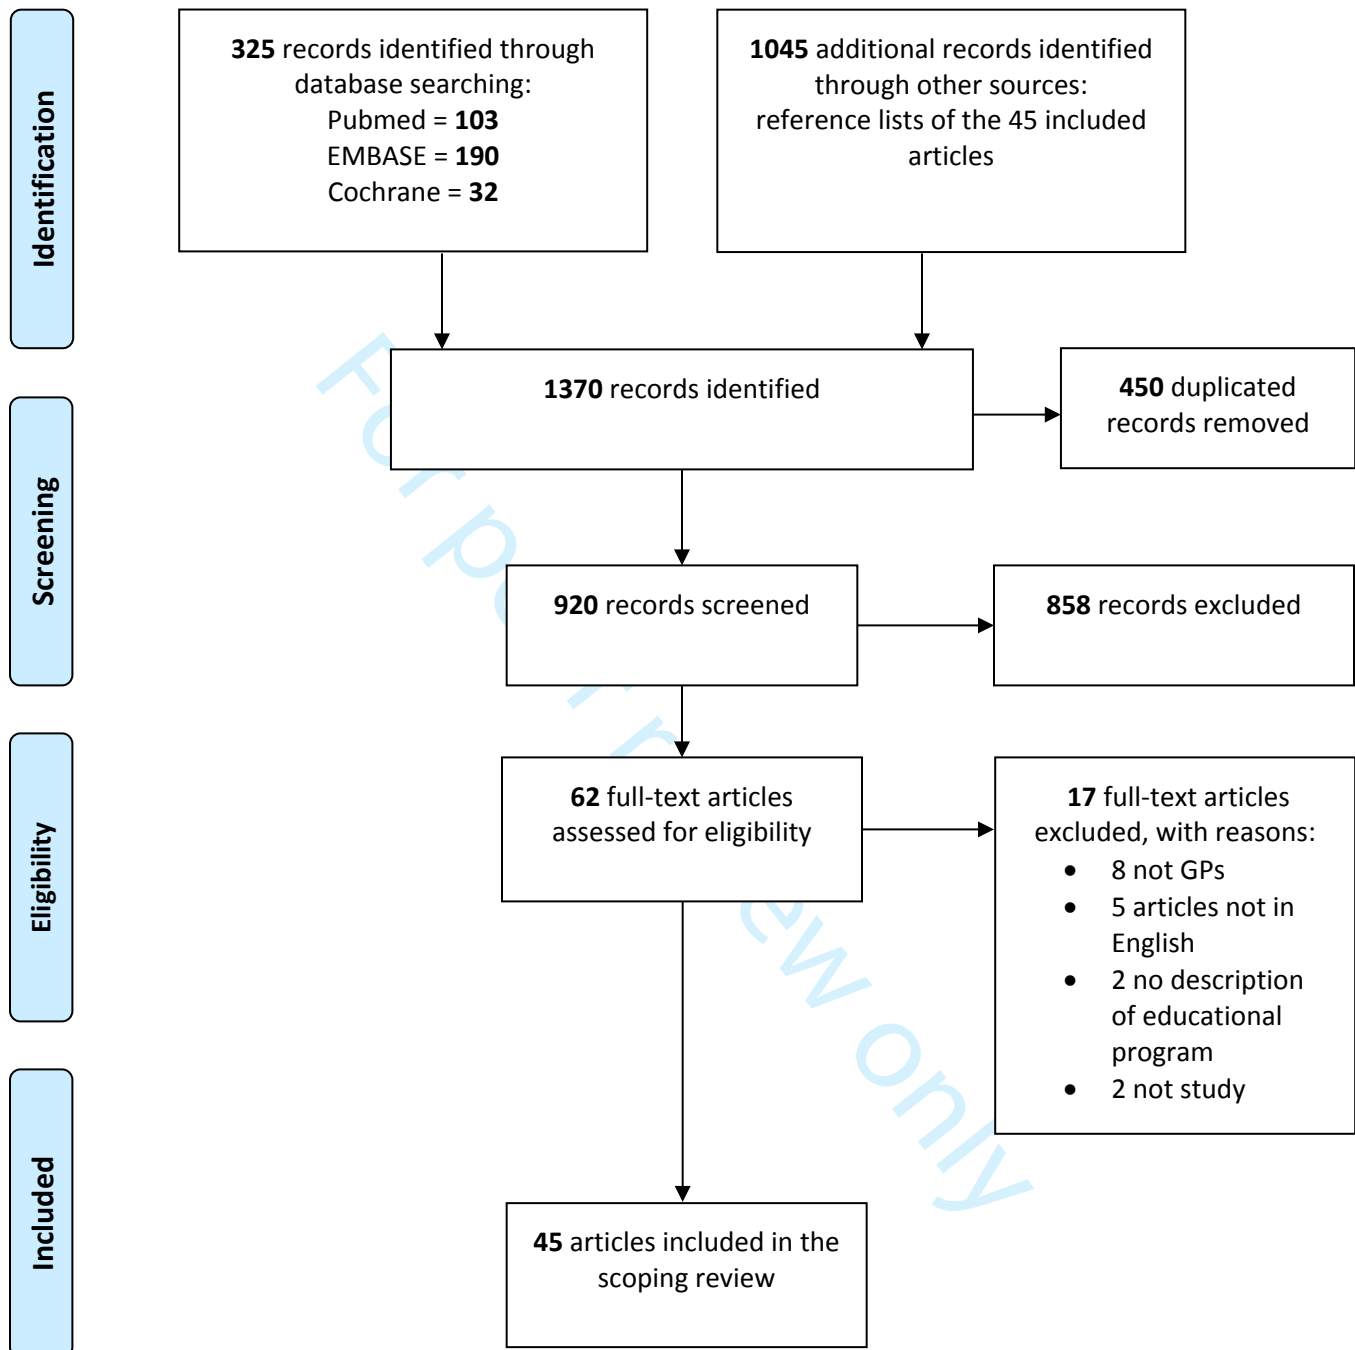



## Preferred Reporting Items for Systematic reviews and Meta-Analyses extension for Scoping Reviews (PRISMA-ScR) Checklist

| SECTION                                               | ITEM | PRISMA-ScR CHECKLIST ITEM                                                                                                                                                                                                                                                                                  | REPORTED ON PAGE # |
|-------------------------------------------------------|------|------------------------------------------------------------------------------------------------------------------------------------------------------------------------------------------------------------------------------------------------------------------------------------------------------------|--------------------|
| <b>TITLE</b>                                          |      |                                                                                                                                                                                                                                                                                                            |                    |
| Title                                                 | 1    | Identify the report as a scoping review.                                                                                                                                                                                                                                                                   | 1                  |
| <b>ABSTRACT</b>                                       |      |                                                                                                                                                                                                                                                                                                            |                    |
| Structured summary                                    | 2    | Provide a structured summary that includes (as applicable): background, objectives, eligibility criteria, sources of evidence, charting methods, results, and conclusions that relate to the review questions and objectives.                                                                              | 2                  |
| <b>INTRODUCTION</b>                                   |      |                                                                                                                                                                                                                                                                                                            |                    |
| Rationale                                             | 3    | Describe the rationale for the review in the context of what is already known. Explain why the review questions/objectives lend themselves to a scoping review approach.                                                                                                                                   | 4                  |
| Objectives                                            | 4    | Provide an explicit statement of the questions and objectives being addressed with reference to their key elements (e.g., population or participants, concepts, and context) or other relevant key elements used to conceptualize the review questions and/or objectives.                                  | 4                  |
| <b>METHODS</b>                                        |      |                                                                                                                                                                                                                                                                                                            |                    |
| Protocol and registration                             | 5    | Indicate whether a review protocol exists; state if and where it can be accessed (e.g., a Web address); and if available, provide registration information, including the registration number.                                                                                                             | N.A.               |
| Eligibility criteria                                  | 6    | Specify characteristics of the sources of evidence used as eligibility criteria (e.g., years considered, language, and publication status), and provide a rationale.                                                                                                                                       | 5                  |
| Information sources*                                  | 7    | Describe all information sources in the search (e.g., databases with dates of coverage and contact with authors to identify additional sources), as well as the date the most recent search was executed.                                                                                                  | 5-6                |
| Search                                                | 8    | Present the full electronic search strategy for at least 1 database, including any limits used, such that it could be repeated.                                                                                                                                                                            | 6                  |
| Selection of sources of evidence†                     | 9    | State the process for selecting sources of evidence (i.e., screening and eligibility) included in the scoping review.                                                                                                                                                                                      | 6                  |
| Data charting process‡                                | 10   | Describe the methods of charting data from the included sources of evidence (e.g., calibrated forms or forms that have been tested by the team before their use, and whether data charting was done independently or in duplicate) and any processes for obtaining and confirming data from investigators. | 6                  |
| Data items                                            | 11   | List and define all variables for which data were sought and any assumptions and simplifications made.                                                                                                                                                                                                     | Table 2            |
| Critical appraisal of individual sources of evidence§ | 12   | If done, provide a rationale for conducting a critical appraisal of included sources of evidence; describe the methods used and how this information was used in any data synthesis (if appropriate).                                                                                                      | 5                  |

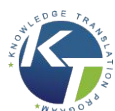

| SECTION                                       | ITEM | PRISMA-ScR CHECKLIST ITEM                                                                                                                                                                       | REPORTED ON PAGE # |
|-----------------------------------------------|------|-------------------------------------------------------------------------------------------------------------------------------------------------------------------------------------------------|--------------------|
| Synthesis of results                          | 13   | Describe the methods of handling and summarizing the data that were charted.                                                                                                                    | 6                  |
| <b>RESULTS</b>                                |      |                                                                                                                                                                                                 |                    |
| Selection of sources of evidence              | 14   | Give numbers of sources of evidence screened, assessed for eligibility, and included in the review, with reasons for exclusions at each stage, ideally using a flow diagram.                    | <b>Figure 1</b>    |
| Characteristics of sources of evidence        | 15   | For each source of evidence, present characteristics for which data were charted and provide the citations.                                                                                     | <b>Table 3</b>     |
| Critical appraisal within sources of evidence | 16   | If done, present data on critical appraisal of included sources of evidence (see item 12).                                                                                                      | <b>N.A.</b>        |
| Results of individual sources of evidence     | 17   | For each included source of evidence, present the relevant data that were charted that relate to the review questions and objectives.                                                           | <b>Table 3</b>     |
| Synthesis of results                          | 18   | Summarize and/or present the charting results as they relate to the review questions and objectives.                                                                                            | <b>7-8</b>         |
| <b>DISCUSSION</b>                             |      |                                                                                                                                                                                                 |                    |
| Summary of evidence                           | 19   | Summarize the main results (including an overview of concepts, themes, and types of evidence available), link to the review questions and objectives, and consider the relevance to key groups. | <b>9-10-11</b>     |
| Limitations                                   | 20   | Discuss the limitations of the scoping review process.                                                                                                                                          | <b>12</b>          |
| Conclusions                                   | 21   | Provide a general interpretation of the results with respect to the review questions and objectives, as well as potential implications and/or next steps.                                       | <b>13</b>          |
| <b>FUNDING</b>                                |      |                                                                                                                                                                                                 |                    |
| Funding                                       | 22   | Describe sources of funding for the included sources of evidence, as well as sources of funding for the scoping review. Describe the role of the funders of the scoping review.                 | <b>1</b>           |

JBI = Joanna Briggs Institute; PRISMA-ScR = Preferred Reporting Items for Systematic reviews and Meta-Analyses extension for Scoping Reviews.

\* Where *sources of evidence* (see second footnote) are compiled from, such as bibliographic databases, social media platforms, and Web sites.

† A more inclusive/heterogeneous term used to account for the different types of evidence or data sources (e.g., quantitative and/or qualitative research, expert opinion, and policy documents) that may be eligible in a scoping review as opposed to only studies. This is not to be confused with *information sources* (see first footnote).

‡ The frameworks by Arksey and O'Malley (6) and Levac and colleagues (7) and the JBI guidance (4, 5) refer to the process of data extraction in a scoping review as data charting.

§ The process of systematically examining research evidence to assess its validity, results, and relevance before using it to inform a decision. This term is used for items 12 and 19 instead of "risk of bias" (which is more applicable to systematic reviews of interventions) to include and acknowledge the various sources of evidence that may be used in a scoping review (e.g., quantitative and/or qualitative research, expert opinion, and policy document).

From: Tricco AC, Lillie E, Zarin W, O'Brien KK, Colquhoun H, Levac D, et al. PRISMA Extension for Scoping Reviews (PRISMA-ScR): Checklist and Explanation. *Ann Intern Med.* 2018;169:467–473. doi: [10.7326/M18-0850](https://doi.org/10.7326/M18-0850).

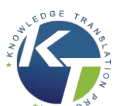

**St. Michael's**

Inspired Care.  
Inspiring Science.

For peer review only - <http://bmjopen.bmj.com/site/about/guidelines.xhtml>

# BMJ Open

## Training general practitioners in melanoma diagnosis: a scoping review of the literature.

|                                 |                                                                                                                                                                                                                                                                                                                                                                                                                                           |
|---------------------------------|-------------------------------------------------------------------------------------------------------------------------------------------------------------------------------------------------------------------------------------------------------------------------------------------------------------------------------------------------------------------------------------------------------------------------------------------|
| Journal:                        | <i>BMJ Open</i>                                                                                                                                                                                                                                                                                                                                                                                                                           |
| Manuscript ID                   | bmjopen-2020-043926.R1                                                                                                                                                                                                                                                                                                                                                                                                                    |
| Article Type:                   | Original research                                                                                                                                                                                                                                                                                                                                                                                                                         |
| Date Submitted by the Author:   | 01-Feb-2021                                                                                                                                                                                                                                                                                                                                                                                                                               |
| Complete List of Authors:       | Harkemanne, Evelyne; Cliniques universitaires Saint-Luc, Dermatology; Université catholique de Louvain Institut de Recherche Expérimentale et Clinique<br>Baeck, Marie; Cliniques universitaires Saint-Luc, Dermatology; Université catholique de Louvain Institut de Recherche Expérimentale et Clinique<br>Tromme, Isabelle; Cliniques universitaires Saint-Luc, Dermatology; Cliniques universitaires Saint-Luc Institut Roi Albert II |
| <b>Primary Subject Heading</b>: | General practice / Family practice                                                                                                                                                                                                                                                                                                                                                                                                        |
| Secondary Subject Heading:      | Dermatology, Medical education and training, Diagnostics                                                                                                                                                                                                                                                                                                                                                                                  |
| Keywords:                       | GENERAL MEDICINE (see Internal Medicine), Dermatological tumours < DERMATOLOGY, EDUCATION & TRAINING (see Medical Education & Training)                                                                                                                                                                                                                                                                                                   |
|                                 |                                                                                                                                                                                                                                                                                                                                                                                                                                           |

SCHOLARONE™  
Manuscripts

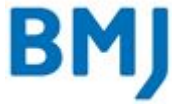

I, the Submitting Author has the right to grant and does grant on behalf of all authors of the Work (as defined in the below author licence), an exclusive licence and/or a non-exclusive licence for contributions from authors who are: i) UK Crown employees; ii) where BMJ has agreed a CC-BY licence shall apply, and/or iii) in accordance with the terms applicable for US Federal Government officers or employees acting as part of their official duties; on a worldwide, perpetual, irrevocable, royalty-free basis to BMJ Publishing Group Ltd ("BMJ") its licensees and where the relevant Journal is co-owned by BMJ to the co-owners of the Journal, to publish the Work in this journal and any other BMJ products and to exploit all rights, as set out in our [licence](#).

The Submitting Author accepts and understands that any supply made under these terms is made by BMJ to the Submitting Author unless you are acting as an employee on behalf of your employer or a postgraduate student of an affiliated institution which is paying any applicable article publishing charge ("APC") for Open Access articles. Where the Submitting Author wishes to make the Work available on an Open Access basis (and intends to pay the relevant APC), the terms of reuse of such Open Access shall be governed by a Creative Commons licence – details of these licences and which [Creative Commons](#) licence will apply to this Work are set out in our licence referred to above.

Other than as permitted in any relevant BMJ Author's Self Archiving Policies, I confirm this Work has not been accepted for publication elsewhere, is not being considered for publication elsewhere and does not duplicate material already published. I confirm all authors consent to publication of this Work and authorise the granting of this licence.

# Training general practitioners in melanoma diagnosis: a scoping review of the literature

E. Harkemanne M.D.,<sup>1,2</sup> M. Baeck M.D. Ph.D.,<sup>1,2</sup> I. Tromme M.D. Ph.D.<sup>1,2,3</sup>

<sup>1</sup>Dermatology department, Cliniques universitaires Saint-Luc, Brussels, Belgium

<sup>2</sup>Institute of Experimental and Clinical Research (IREC), UCLouvain, Brussels, Belgium

<sup>3</sup>King Albert II Cancer and Hematology Institute, Cliniques universitaires Saint-Luc, Brussels, Belgium

## Corresponding Author:

Evelyne Harkemanne, M.D.

Dermatology department

Cliniques universitaires Saint-Luc

Avenue Hippocrate, 10

B-1200 Brussels, Belgium

Email: evelyne.harkemanne@uclouvain.be

**Funding sources:** None

**Conflict of Interest:** None declared

**Reprint requests:** Evelyne Harkemanne

**Manuscript word count:** 3245

**Figure:** 1

**Tables:** 4

**Supplementary table:** 1

## **Abstract**

*Background:* General practitioners (GPs) play a key role in early melanoma detection. In order to help GPs deal with suspicious skin lesions, melanoma diagnostic training programs have been developed. However, it is unclear whether these programs guarantee the acquisition of skills that will be applied by the GPs in their daily clinical practice and maintained over time.

*Objectives:* This scoping review aimed to examine and compare educational programs designed to train GPs in melanoma diagnosis using clinical (naked eye) examination alone or dermoscopy +/- clinical examination, and sought to inform on the long-term sustainability of the GPs' acquired skills.

*Eligibility criteria:* Studies eligible for inclusion evaluated educational programs for teaching diagnosis of melanoma to GPs. MEDLINE, EMBASE, and Cochrane databases were searched for relevant articles from 1995 to May 2020.

*Results:* Forty-five relevant articles were found assessing 31 educational programs. Most programs that improved the diagnostic accuracy and long-term performances of the GPs i.e., increase in confidence, decrease in dermatologist referral of benign skin lesions, and improvement of the benign/malignant ratio of excised skin lesions, trained the GPs in clinical diagnosis followed by dermoscopy. To maintain long-term performances, these programs provided refresher training material.

*Conclusion:* This review shows that studies generally report positive outcomes from the training of GPs in melanoma diagnosis. However, refresher training material seemed necessary to maintain the acquired skills. The optimal form and ideal frequency for these updates have yet to be defined.

### **Strengths and limitations of the review**

- Systematic review conducted following the guidelines of the PRISMA-ScR (Preferred Reporting Items for Systematic reviews and Meta-Analyses extension for Scoping Reviews) checklist.
- It thoroughly evaluates educational programs on melanoma diagnosis for general practitioners.
- Specifically, the review examines the long-term effect of the educational programs and the value of providing regular refresher training sessions after the training.
- This review led inevitably to some publication bias as only English language peer-reviewed articles were included.

### **Acknowledgements**

The authors would like to thank Graziella Messina, Research Assistant at the Health Sciences Library of the Catholic University of Louvain, UCLouvain in Brussels, for her help in developing the research strategy for this review.

### **Contributorship statement**

E. Harkemanne developed the research protocol, completed the literature search and screened the articles for inclusion, extracted the data, synthesised the findings, interpreted the results and drafted the manuscript. M. Baeck screened the articles for inclusion, extracted data and critically revised the manuscript. I. Tromme developed the protocol, independently reviewed the articles for inclusion, extracted data, interpreted the results and critically revised the manuscript. All authors approved the final version.

### **Data availability statement**

All data relevant to the study are included in the article.

## **Introduction**

Early melanoma detection is essential to reduce morbidity and mortality of melanoma patients.<sup>1</sup> Given the increased incidence of this aggressive skin cancer, primary care physicians (PCPs) play a key role in early melanoma diagnosis.<sup>2-4</sup> PCPs include a number of health care professionals who provide first and continuing medical care to a patient. In this review, we focus on GPs who take care of patients in community settings and are, in most countries, the first point of contact for any patient with a health issue.

To improve the diagnostic accuracy of melanoma by GPs, specific educational training programs have been developed. At first, training courses focused on melanoma diagnosis by clinical (naked eye) examination alone. A systematic review<sup>5</sup>, published in 2011, reported on 20 studies that evaluated 13 educational interventions in clinical melanoma diagnosis for PCPs. All the evaluated interventions improved diagnostic accuracy and melanoma management. Later, educational programs that included dermoscopy training were created and were then evaluated for primary care. To date, dermoscopy has been the most widely non-invasive *in vivo* technique used in clinical practice to assess skin tumors.<sup>6</sup> It involves the use of a handheld device which allows the observation of skin structures invisible to the naked eye. However, the sensitivity and specificity of the technique are operator-dependent (trained vs. untrained physicians).<sup>7</sup> Ninety-two percent sensitivity and 95% specificity can be achieved for melanoma diagnosis by a trained dermatologist combining visual inspection and *in vivo* dermoscopy.<sup>8</sup> In primary care, dermoscopy has also been shown to be an effective tool for the triage of suspicious pigmented skin lesions when performed by properly trained PCPs.<sup>9,10</sup> Yet, the minimum training required to reach competence is still unknown.<sup>11</sup>

Previously published reviews<sup>5,11-14</sup> on training programs in melanoma diagnosis for GPs focused on the content, teaching method, outcome measures and study-by-study efficacy of the evaluated educational interventions. However, they did not assess whether the GPs' acquired skills were measured in the short or long term. Yet, given the increasing burden of melanoma on general practice, it is crucial to know whether these programs are capable of teaching GPs easily applicable and sustainable skills in melanoma diagnosis and management. This scoping review aimed to explore educational programs training GPs in melanoma diagnosis using clinical (naked eye) examination alone and diagnosis using dermoscopy +/- clinical examination. Educational programs were examined with regard to training content, teaching



1  
2  
3 method, training duration, availability of refresher training material, and outcome measures.  
4 This review also specifically sought to inform on the long-term sustainability of the skills  
5 acquired during these training programs.  
6  
7  
8

## 9 **Material and methods**

10  
11 To carry out this literature review, a scoping review seemed the most appropriate. Indeed, the  
12 results from studies on educational programs on melanoma diagnosis for GPs presented with a  
13 wide range of study designs and heterogeneous outcome measures, which made it impossible  
14 to formally assess the quality of these studies and to perform a meta-analysis. To conduct this  
15 scoping review, the framework developed by Arksey and O'Malley,<sup>15</sup> subsequently refined by  
16 Levac,<sup>16</sup> and the guidelines of the PRISMA-ScR<sup>17</sup> (Preferred Reporting Items for Systematic  
17 reviews and Meta-Analyses extension for Scoping Reviews) checklist were followed.  
18  
19  
20  
21  
22  
23  
24

### 25 **Eligibility criteria**

26  
27 Studies eligible for inclusion in this review (Table 1) evaluated educational programs teaching  
28 either clinical diagnosis of melanoma and/or diagnosis using dermoscopy +/- clinical  
29 examination and designed primarily for PCPs including GPs. The population of interest  
30 included qualified GPs and GP trainees. Specialists and GPs working in hospital settings and/or  
31 specialized clinics were excluded. Studies that included training programs for PCPs other than  
32 GPs were not eligible. Studies where no participant training in melanoma diagnosis was  
33 proposed and studies evaluating exclusively non-melanoma skin cancer detection were also  
34 excluded. Studies evaluating teledermoscopy and computer-aided diagnosis of melanoma were  
35 not assessed as they do not require specific education in melanoma recognition by the  
36 participants. Only studies assessing the type of educational program and its short and/or the  
37 long-term efficacy on the skills acquired by the GPs were included. Finally, only peer-reviewed  
38 and English language articles were included.  
39  
40  
41  
42  
43  
44  
45  
46  
47  
48

### 49 **Data sources and study selection**

50  
51 MEDLINE, EMBASE, and Cochrane databases were searched for relevant articles published  
52 from 1995 to May 2020. Studies were selected for inclusion by three authors (EH, MB, and IT),  
53 with IT providing the final decision in the event of disagreement. The studies were not assessed  
54 for bias, as the risk of bias assessment was reported as not applicable to scoping reviews in the  
55 2018 PRISMA-ScR guidelines.<sup>17</sup>  
56  
57  
58  
59  
60

To extensively cover the literature on the subject, four categories of terms were identified: (1) general practitioners, family doctor, general medicine, family practice, primary care physicians; (2) education, continuing medical education; (3) melanoma, malignant melanoma, cutaneous melanoma, skin neoplasms; (4) diagnosis, and cancer early detection. In MEDLINE, the following Medical Subject Headings (MeSH) were used: *general practitioners OR family practice OR primary care physicians OR general practice AND melanoma AND diagnosis*. No limits were defined. In EMBASE, Emtree terms were exploded: *general practitioner, family doctor, primary care, family physician, primary care physician, melanoma, diagnosis, and education*. In the Cochrane database, the following terms were searched: *melanoma AND diagnosis AND general practitioners OR family medicine AND dermoscopy* (see Supplementary Table 1 for search strategies). In addition, the reference lists of included studies were screened as a source of further relevant articles.

### Data extraction

Two authors (EH and MB) reviewed all included articles and independently collected data. Extracted data included authors, year of publication, origin of the article, study design, number of participating GPs, type of educational program, type of outcome measures and short- and/or long-term evaluation of these outcomes. The type of educational program included training content, teaching method, training duration and refresher training material (if provided). To facilitate comparison with data found in previous reviews, all these data were reported into categories adapted from those presented by Fee *et al.*<sup>14</sup>

Table 2 gives the definition of the different categories. The training content was subdivided into six components: epidemiology, clinical diagnosis, clinical algorithm, dermoscopic diagnosis, dermoscopic algorithm and management. The teaching method was considered either as live, in the form of scientific literature, e-learning, or self-assessment. The refresher training material specified the material available for participants to refresh their skills after the training. The outcome measures were expressed either in terms of competence or in terms of performance, according to the assessment approach of continuing medical education programs proposed by Moore.<sup>18</sup> Finally, since the limits between short-term and long-term evaluation of a medical educational program are not standardized, arbitrary limits have been chosen based on the observations made during this literature review.

## Patient and Public Involvement

No patient and public involvement was required for this review.

## Results

In total, 325 articles were identified from the electronic database searches, as shown in the PRISMA flowchart<sup>19</sup> (Figure 1). At the end of the study selection process, 45 relevant articles, which assessed 31 educational interventions, were included in the review analysis.

### Study designs

Thirty-six interventional studies with a range of study designs were found: 11 randomized controlled trials (RCTs)<sup>9,10,20-29</sup>, 19 diagnostic accuracy studies<sup>30-39,40-48</sup>, three cohort studies<sup>49-51</sup> and three case-control studies.<sup>52-54</sup> Five of the 31 training programs were assessed twice.<sup>22,23,26,30,42</sup>

Four systematic reviews were identified: one on the training of PCPs in clinical melanoma diagnosis,<sup>5</sup> two on the training of PCPs in dermoscopy for melanoma diagnosis,<sup>12,13</sup> and one on the use of dermoscopy in primary care.<sup>11</sup> A scoping review on the training of PCPs in dermoscopy<sup>14</sup> was also included. The final three articles were descriptive articles of the educational programs and study protocols.<sup>55-57</sup>

### Educational programs

The educational programs in melanoma diagnosis for GPs varied in terms of content, teaching method and outcome measures. The characteristics of these training programs are summarized in Table 3.

#### *Training content*

Of the 31 educational programs, 15 involved the training of GPs in clinical diagnosis, five involved dermoscopic diagnosis alone, and 11 involved the training of GPs in both of these melanoma diagnostic methods. Twelve (80%) of the clinical diagnostic training programs also involved learning of epidemiology and 11 (73%) learning of management guidelines for suspicious lesions. Only seven (47%) programs teaching clinical diagnosis used an algorithm to teach melanoma recognition, with the ABCD(E) rule<sup>58</sup> (Asymmetry, uneven Borders, uneven Colors, Diameter > 6mm, and Evolution) being most commonly taught. Of the dermoscopic

1  
2  
3 training programs, 12 (80%) included learning of at least one dermoscopic algorithm (Menzies'  
4 method,<sup>24,35,37,40</sup> Three-point checklist,<sup>9,40,41</sup> the 7-point checklist,<sup>10,35</sup> TADA,<sup>44,47</sup> the ABCD  
5 rule,<sup>35,38</sup> BLINCK,<sup>40</sup> and pattern analysis<sup>35,53</sup>). The Menzies' method,<sup>59</sup> the ABCD rule,<sup>60</sup>  
6 pattern analysis and the 7-point checklist<sup>61</sup> were designed originally for trained physicians, and  
7 were later tested as effective when used by non-experts.<sup>62</sup> Other algorithms, such as the Three-  
8 point checklist<sup>63</sup> and the Triage Amalgamated Dermoscopic Algorithm (TADA)<sup>44</sup> were initially  
9 created for use by PCPs. In addition, two educational programs included training on other  
10 diagnostic tools, such as sequential digital dermoscopy imaging<sup>37</sup> and polaroid instant camera  
11 photography.<sup>26</sup>  
12  
13  
14  
15  
16  
17  
18  
19

### 20 *Teaching method, training duration and refresher training material*

21 Live training courses and the use of educational books, posters or videos (literature) were the  
22 two preferred teaching methods of clinical diagnostic training programs. Five training programs  
23 also used an e-learning approach.<sup>25,28,30,51,54</sup> The most common teaching method used in  
24 dermoscopic training programs was live training. This approach was combined with literature  
25 and/or e-learning in six programs. Three programs also used self-assessment. Overall, the  
26 teaching method did not appear to have influenced the program outcomes. Duration of training  
27 varied from 75 minutes to 1 day, was not specified in two studies<sup>31,40</sup>, and was participant  
28 dependent in six studies using self-assessment methods. Six dermoscopic diagnostic training  
29 programs<sup>29,37,38,41,49,53</sup> and three programs in clinical diagnosis<sup>27,36,50</sup> provided regular refresher  
30 training material such as unlimited e-learning access or self-assessment training sessions.  
31  
32  
33  
34  
35  
36  
37  
38  
39  
40

### 41 *Training outcomes*

42 Table 4 summarizes the outcome measures of the studies. In the selected studies, the GPs'  
43 competences were generally measured in the short term and their performances measured in the  
44 long term after the training.  
45  
46  
47  
48  
49

50 Eight clinical diagnostic training programs and seven dermoscopic training programs only  
51 assessed the short-term efficacy of their program (Table 4A). For these studies, the competences  
52 most often evaluated were diagnostic accuracy and appropriate management measured in a  
53 training setting. The most evaluated short-term performance, measured in a clinical setting, was  
54 the GPs' confidence in diagnosing melanoma. With the exception of two studies, all showed a  
55 positive impact of their intervention.<sup>21,23</sup> Four clinical diagnostic training programs and three  
56 dermoscopic training programs (one teaching dermoscopy alone<sup>53</sup>) only assessed long-term  
57  
58  
59  
60

1  
2  
3 performances (Table 4B). The most evaluated long-term performances, measured in daily  
4 clinical practice, were the GPs' diagnostic accuracy and the benign/malignant ratio of excised  
5 lesions. Three studies<sup>9,36,49</sup> reported improvement of the GPs' performances in melanoma  
6 diagnosis. The other studies reported no improvement.  
7  
8  
9

10  
11 Finally, three clinical diagnostic and seven dermoscopic training programs assessed the short-  
12 and long-term outcome of their training (Table 4C). Except for one,<sup>23</sup> all these training  
13 programs demonstrated improvement of the GPs' competences, measured in a training setting  
14 in the short term. In the long term, eight training programs<sup>10,37,38,41,49,50,53,54</sup> reported significant  
15 improvement of the GPs' performances for the diagnosis of melanoma and benign skin lesions.  
16 This led to either a decrease in the referral rates to dermatologists<sup>37,41,54</sup> and/or a decrease in the  
17 ratio of benign/malignant excised skin lesions.<sup>37,49</sup> Among the major studies, Koelink *et al.*<sup>10</sup>  
18 found that their dermoscopic training program improved the GPs' long-term performances with  
19 up to 1.25 times greater diagnostic accuracy for skin lesions including melanomas. In a French  
20 department, Grange *et al.*<sup>50</sup> observed an impressive reduction of the incidence of advanced  
21 melanomas (Breslow thickness  $\geq 3$  mm) during the 3-year period after their GP training  
22 campaign in clinical melanoma diagnosis. A very recent study by Marra *et al.*,<sup>54</sup> assessing 1662  
23 referrals, reported better quality of referrals by GPs trained in melanoma diagnosis than by  
24 untrained GPs, potentially leading to less unnecessary referrals. However, two educational  
25 programs<sup>28,29</sup> were unable to maintain the GPs' acquired performances in the long term.  
26  
27  
28  
29  
30  
31  
32  
33  
34  
35  
36  
37  
38

## 39 **Discussion**

40  
41 This scoping review aimed to explore educational programs training GPs in melanoma  
42 diagnosis using clinical (naked eye) examination alone and diagnosis using dermoscopy +/-  
43 clinical examination. Educational programs were examined with regard to training content,  
44 teaching method, training duration, availability of refresher training material, and outcome  
45 measures. This review also specifically sought to inform on the long-term sustainability of the  
46 skills acquired during these training programs.  
47  
48  
49  
50  
51

### 52 **Types of educational programs with positive long-term outcomes**

53  
54 Most reported educational programs that improved long-term diagnostic accuracy and changed  
55 GPs' melanoma practice patterns trained their participating GPs in dermoscopy combined with  
56 clinical diagnosis. This teaching method is supported by a recent Cochrane review<sup>8</sup> in which  
57 dermoscopy alone was found to be less accurate than clinical examination followed by  
58  
59  
60

1  
2  
3 dermoscopy for the diagnosis of melanoma. The Cochrane review results also suggested that  
4 dermoscopic algorithms were the most useful method to train non-experts in dermoscopy. In  
5 our review, we found that five of the programs with long-term positive impact used  
6 dermoscopic algorithms to teach melanoma diagnosis.<sup>10,37,38,41,53</sup>  
7  
8  
9

10  
11 Unfortunately, the substantial number of training hours necessary to become competent in  
12 dermoscopy is the main reported factor limiting its use in general practice.<sup>64,65</sup> At this time,  
13 there is no evidence on the optimal length of training, even though it has been demonstrated  
14 that diagnostic accuracy of dermoscopy depends on the degree of training of the practitioner.<sup>66</sup>  
15 One study suggested that 1 day of live training in dermoscopy was sufficient to build the  
16 confidence of GPs with special interest in melanoma diagnosis.<sup>67</sup> We found two RCTs that  
17 demonstrated sustained improvement of GPs' diagnostic accuracy, both of which proposed live  
18 training in dermoscopy over 1 day or 10 hours.<sup>9,10</sup> Because the duration of training in  
19 dermoscopy is a limiting factor for most GPs, it is important to keep in mind that training in  
20 clinical melanoma diagnosis has also been shown to improve the GPs' performances while  
21 requiring less training time (in this review, a mean duration of 2.5 hours was observed for  
22 clinical diagnostic training programs).<sup>36,50</sup>  
23  
24  
25  
26  
27  
28  
29  
30  
31  
32  
33

34 However, we found that educational programs teaching dermoscopy have been more likely to  
35 assure positive long-term outcomes than programs teaching clinical examination alone. One of  
36 the reasons could be that the latter used measures of performance such as GPs' confidence level  
37 and number of total-body skin examinations performed before and after training, which did not  
38 reflect GPs' diagnostic ability in clinical practice. On the one hand, measuring the confidence  
39 of GPs is more useful in assessing the quality of a training program than in assessing skills  
40 acquired by participants. From a pedagogical point of view, participants feel more confident  
41 when they know how to use the teaching content in daily practice.<sup>18</sup> On the other hand, the  
42 number of total-body skin examinations performed may be useful in measuring GPs' awareness  
43 of skin tumours, but not for evaluation of GPs' diagnostic skills.  
44  
45  
46  
47  
48  
49  
50  
51  
52

### 53 **Long-term improvement of the GPs' performances in clinical settings**

54 The GPs' long-term performances measured in clinical settings were assessed for 15  
55 educational programs: six in clinical diagnosis and nine in dermoscopic diagnosis. Ten showed  
56 a positive impact on the GPs' performances measured over periods ranging from 6 to 19  
57 months. The most frequent observations were a decrease of referral rates to dermatologists for  
58  
59  
60

1  
2  
3 benign skin lesions and an improvement of the benign/malignant ratio of excised skin lesions.  
4 The INFORMED group<sup>41</sup> reported an increase in melanoma diagnosis during a screening  
5 campaign by GPs trained with their program in 2016.<sup>68</sup> Furthermore, a decrease of the incidence  
6 of advanced melanomas was shown in a French department over a 3-year period after their  
7 training program in clinical melanoma diagnosis.<sup>50</sup> Unfortunately, two educational  
8 programs<sup>28,29</sup> failed to maintain the GPs' acquired performances at 1 year after the end of the  
9 training. The reasons might be that Markova *et al.*<sup>28</sup> chose to assess the number of total-body  
10 skin examinations performed but did not evaluate the GPs' diagnostic accuracy and that  
11 Badertscher *et al.*<sup>29</sup> trained their GPs to use Lumio®, a polarized magnifying glass with 2x  
12 magnification instead of a standard dermoscopy device (10x magnification).  
13  
14  
15  
16  
17  
18  
19  
20  
21

22 To retain acquired diagnostic skills over the long term, results of a recent RCT suggested the  
23 need for “refresher sessions at regular intervals”.<sup>69,70</sup> In our review, nine (60%) educational  
24 programs evaluated in the long-term provided refresher training material. Seven of these  
25 programs were successful. In 2014, Grange *et al.*<sup>50</sup> produced a CD-ROM containing their  
26 teaching material and sent regular information about melanoma to the GPs. The INFORMED  
27 group<sup>41</sup> provided GPs with a free unlimited access to their web-based course. Menzies *et al.*<sup>37</sup>  
28 gave participating GPs an educational textbook and an unlimited e-learning access. Grimaldi *et*  
29 *al.*<sup>38</sup> and Youl *et al.*<sup>49</sup> also ensured self-assessment refresher training sessions. Marra *et al.*<sup>54</sup>  
30 found a 10-month sustainability of the diagnostic accuracy of their trained GPs and assumed  
31 that daily use of the obtained knowledge during the study period achieved this effect. Only  
32 Koelink *et al.*,<sup>10</sup> who evaluated the longest post-training period (19 months) and who  
33 demonstrated sustainability of diagnostic skills, did not specify whether update training  
34 modalities were provided.  
35  
36  
37  
38  
39  
40  
41  
42  
43  
44  
45

46 However, the ideal frequency and form of updates have never been studied. An RCT, taking  
47 place in the English National Defibrillator Programme, determined that update session intervals  
48 after a medical education session should not exceed 7 months to limit the loss of acquired skills  
49 and maintain the participants confidence.<sup>71</sup> In the UK, a survey among GPs with special interest  
50 in dermatology stated that self-assessment learning was the most popular for refresher  
51 sessions.<sup>67</sup> Nevertheless, they also showed that 36% of GPs that use dermoscopy in their clinical  
52 practice reported to have never updated their training skills. We found that the most appreciated  
53 form of self-assessment updates was the unlimited access to an e-learning course. In the future,  
54 this enthusiasm for online training could lead to the development of smartphone applications to  
55  
56  
57  
58  
59  
60

1  
2  
3 train GPs in melanoma diagnosis. Some newly developed applications have currently been  
4 evaluated among medical students<sup>72</sup> and dermatology residents.<sup>73</sup> Initial results already looked  
5 very promising.  
6  
7

### 8 9 **Limitations**

10  
11 This scoping review has some limitations and led inevitably to certain publication biases. We  
12 used keywords for the selection of articles and only peer-reviewed articles were included. By  
13 limiting our research to English language articles, some studies may also have been missed. It  
14 is also very likely that melanoma diagnostic training programs exist in unpublished forms, for  
15 example in university continuing medical education programs. Moreover, we focused only on  
16 studies assessing melanoma diagnostic training methods among GPs. Therefore, we may have  
17 failed to mention some educational programs for primary care in this review. Furthermore,  
18 educational programs which were not evaluated in studies were overlooked. Finally, this review  
19 covers educational programs over a 25-year period. As technology has evolved considerably  
20 over this time, some teaching methods and refresher training materials have been overshadowed  
21 by interactive online tutorials (e-learning) - all the more so with the health crisis caused by  
22 COVID-19 during which distance learning methods have developed very rapidly.  
23  
24  
25  
26  
27  
28  
29  
30  
31  
32  
33

### 34 **Conclusion**

35  
36 In conclusion, educational programs trained GPs in melanoma diagnosis using clinical  
37 examination alone or dermoscopy +/- clinical diagnosis. Most reported programs that improved  
38 the long-term diagnostic accuracy and changed routine performances of the GPs (i.e., decrease  
39 in dermatologist referral of benign skin lesions, and improvement of the benign/malignant ratio  
40 of excised skin lesions), trained their participating GPs in both diagnostic methods. The  
41 preferred teaching methods were live and e-learning but the teaching method did not seem to  
42 influence the GPs' acquired performances. It is important to note that the educational programs  
43 that achieved long term sustainability of GPs' performances in daily clinical practice provided  
44 refresher training material. However, the optimal form and ideal frequency of these updates  
45 have yet to be defined.  
46  
47  
48  
49  
50  
51  
52  
53  
54  
55  
56  
57  
58  
59  
60



## References

- 1 Petrie T, Samatham R, Witkowski AM, *et al.* Melanoma Early Detection: Big Data, Bigger Picture. *J. Invest. Dermatol.* 2019. doi:10.1016/j.jid.2018.06.187.
- 2 Van Rijsingen MCJ, Van Bon B, Van Der Wilt GJ, *et al.* The current and future role of general practitioners in skin cancer care: An assessment of 268 general practitioners. *Br J Dermatol* 2014. doi:10.1111/bjd.12935.
- 3 Buckley D, McMonagle C. Melanoma in primary care. The role of the general practitioner. *Ir J Med Sci* 2014. doi:10.1007/s11845-013-1021-z.
- 4 Grange F, Barbe C, Mas L, *et al.* The role of general practitioners in diagnosis of cutaneous melanoma: A population-based study in France. *Br. J. Dermatol.* 2012. doi:10.1111/j.1365-2133.2012.11178.x.
- 5 Goulart JM, Quigley EA, Dusza S, *et al.* Skin cancer education for primary care physicians: A systematic review of published evaluated interventions. *J. Gen. Intern. Med.* 2011. doi:10.1007/s11606-011-1692-y.
- 6 Bakos RM, Blumetti TP, Roldán-Marín R, Salerni G. Noninvasive Imaging Tools in the Diagnosis and Treatment of Skin Cancers. *Am. J. Clin. Dermatol.* 2018. doi:10.1007/s40257-018-0367-4.
- 7 Piccolo D, Ferrari A, Peris K, *et al.* Dermoscopic diagnosis by a trained clinician vs. a clinician with minimal dermoscopy training vs. computer-aided diagnosis of 341 pigmented skin lesions: A comparative study. *Br J Dermatol* 2002. doi:10.1046/j.1365-2133.2002.04978.x.
- 8 Dinnes J, Deeks JJ, Chuchu N, *et al.* Dermoscopy, with and without visual inspection, for diagnosing melanoma in adults. *Cochrane Database Syst. Rev.* 2018. doi:10.1002/14651858.CD011902.pub2.
- 9 Argenziano G, Puig S, Zalaudek I, *et al.* Dermoscopy improves accuracy of primary care physicians to triage lesions suggestive of skin cancer. *J Clin Oncol* 2006. doi:10.1200/JCO.2005.05.0864.
- 10 Koelink CJL, Vermeulen KM, Kollen BJ, *et al.* Diagnostic accuracy and cost-effectiveness of dermoscopy in primary care: a cluster randomized clinical trial. *J Eur Acad Dermatology Venereol* 2014. doi:10.1111/jdv.12306.
- 11 Jones OT, Jurascheck LC, Van Melle MA, *et al.* Dermoscopy for melanoma detection and triage in primary care: A systematic review. *BMJ Open.* 2019. doi:10.1136/bmjopen-2018-027529.

- 1  
2  
3 12 Herschorn A. Dermoscopy for melanoma detection in family practice. *Can Fam*  
4 *Physician* 2012.  
5  
6 13 Chia A, Trevena L. A Systematic Review of Training to Improve Melanoma Diagnostic  
7 Skills in General Practitioners. *J. Cancer Educ.* 2016. doi:10.1007/s13187-015-0864-6.  
8  
9 14 Fee JA, McGrady FP, Rosendahl C, Hart ND. Training Primary Care Physicians in  
10 Dermoscopy for Skin Cancer Detection: a Scoping Review. *J. Cancer Educ.* 2019.  
11 doi:10.1007/s13187-019-01647-7.  
12  
13 15 Arksey H, O'Malley L. Scoping studies: Towards a methodological framework. *Int J*  
14 *Soc Res Methodol Theory Pract* 2005. doi:10.1080/1364557032000119616.  
15  
16 16 Levac D, Colquhoun H, O'Brien KK. Scoping studies: Advancing the methodology.  
17 *Implement Sci* 2010. doi:10.1186/1748-5908-5-69.  
18  
19 17 Tricco AC, Lillie E, Zarin W, *et al.* PRISMA extension for scoping reviews (PRISMA-  
20 ScR): Checklist and explanation. *Ann. Intern. Med.* 2018. doi:10.7326/M18-0850.  
21  
22 18 Moore DE. How Physicians Learn and How to Design Learning Experiences for Them:  
23 An Approach Based on an Interpretive Review of Evidence. In: *Continuing Education*  
24 *in the Health Professions: Improving Healthcare through Lifelong Learning.* , 2008.  
25  
26 19 Moher D, Liberati A, Tetzlaff J AD. PRISMA 2009 Flow Diagram. Prism. statement.  
27 2009. doi:10.1371/journal.pmed1000097.  
28  
29 20 Del Mar CB, Green AC. Aid to diagnosis of melanoma in primary medical care. *BMJ*  
30 1995. doi:10.1136/bmj.310.6978.492.  
31  
32 21 Dolan NC, Ng JS, Martin GJ, *et al.* Effectiveness of a skin cancer control educational  
33 intervention for internal medicine housestaff and attending physicians. *J Gen Intern Med*  
34 1997. doi:10.1046/j.1525-1497.1997.07106.x.  
35  
36 22 Gerbert B, Bronstone A, Wolff M, *et al.* Improving primary care residents' proficiency  
37 in the diagnosis of skin cancer. *J Gen Intern Med* 1998. doi:10.1046/j.1525-  
38 1497.1998.00024.x.  
39  
40 23 Raasch BA, Hays R, Buettner PG. An educational intervention to improve diagnosis and  
41 management of suspicious skin lesions. *J Contin Educ Health Prof* 2000.  
42 doi:10.1002/chp.1340200108.  
43  
44 24 Westerhoff K, McCarthy WH, Menzies SW. Increase in the sensitivity for melanoma  
45 diagnosis by primary care physicians using skin surface microscopy. *Br J Dermatol*  
46 2000. doi:10.1046/j.1365-2133.2000.03836.x.  
47  
48 25 Gerbert B, Bronstone A, Maurer T, *et al.* The effectiveness of an Internet-based tutorial  
49 in improving primary care physicians' skin cancer triage skills. *J Cancer Educ* 2002.  
50  
51  
52  
53  
54  
55  
56  
57  
58  
59  
60

- doi:10.1080/08858190209528784.
- 26 English DR, Burton RC, Del Mar CB, *et al.* Evaluation of aid to diagnosis of pigmented skin lesions in general practice: Controlled trial randomised by practice. *Br Med J* 2003. doi:10.1136/bmj.327.7411.375.
- 27 De Gannes GC, Ip JL, Martinka M, *et al.* Early detection of skin cancer by family physicians: A pilot project. *J. Cutan. Med. Surg.* 2004. doi:10.1177/120347540400800205.
- 28 Markova A, Weinstock MA, Risica P, *et al.* Effect of a web-based curriculum on primary care practice: Basic skin cancer triage trial. *Fam Med* 2013.
- 29 Badertscher N, Tandjung R, Senn O, *et al.* A multifaceted intervention: no increase in general practitioners' competence to diagnose skin cancer (minSKIN) - randomized controlled trial. *J Eur Acad Dermatology Venerol* 2015. doi:10.5167/uzh-102419.
- 30 Harris JM, Salasche SJ, Harris RB. Using the Internet to teach melanoma management guidelines to primary care physicians. *J Eval Clin Pract* 1999. doi:10.1046/j.1365-2753.1999.00194.x.
- 31 Bedlow AJ, Cliff S, Melia J, *et al.* Impact of skin cancer education on general practitioners' diagnostic skills. *Clin Exp Dermatol* 2000. doi:10.1046/j.1365-2230.2000.00590.x.
- 32 Harris JM, Salasche SJ, Harris RB. Can internet-based continuing medical education improve physicians' skin cancer knowledge and skills? *J Gen Intern Med* 2001. doi:10.1046/j.1525-1497.2001.00615.x.
- 33 Brochez L, Verhaeghe E, Bleyen L, Naeyaert JM. Diagnostic ability of general practitioners and dermatologists in discriminating pigmented skin lesions. *J Am Acad Dermatol* 2001. doi:10.1067/mjd.2001.113442.
- 34 Carli P, De Giorgi V, Crocetti E, *et al.* Diagnostic and referral accuracy of family doctors in melanoma screening: Effect of a short formal training. *Eur J Cancer Prev* 2005. doi:10.1097/00008469-200502000-00007.
- 35 Dolianitis C, Kelly J, Wolfe R, Simpson P. Comparative performance of 4 dermoscopic algorithms by nonexperts for the diagnosis of melanocytic lesions. *Arch Dermatol* 2005. doi:10.1001/archderm.141.8.1008.
- 36 Peuvrel L, Quereux G, Jumbou O, *et al.* Impact of a campaign to train general practitioners in screening for melanoma. *Eur J Cancer Prev* 2009. doi:10.1097/CEJ.0b013e32831bc3b2.
- 37 Menzies SW, Emery J, Staples M, *et al.* Impact of dermoscopy and short-term sequential

- 1  
2  
3 digital dermoscopy imaging for the management of pigmented lesions in primary care:  
4 A sequential intervention trial. *Br J Dermatol* 2009. doi:10.1111/j.1365-  
5 2133.2009.09374.x.  
6  
7  
8 38 Grimaldi L, Silvestri A, Brandi C, *et al.* Digital epiluminescence dermoscopy for  
9 pigmented cutaneous lesions, primary care physicians, and telediagnosis: a useful tool?  
10 *J Plast Reconstr Aesthetic Surg* 2009. doi:10.1016/j.bjps.2008.01.011.  
11  
12 39 Shariff Z, Roshan A, Williams AM, Platt AJ. 2-Week wait referrals in suspected skin  
13 cancer: Does an instructional module for general practitioners improve diagnostic  
14 accuracy? *Surgeon* 2010. doi:10.1016/j.surge.2010.03.004.  
15  
16 40 Bourne P, Rosendahl C, Keir J, Cameron A. BLINCK—A diagnostic algorithm for skin  
17 cancer diagnosis combining clinical features with dermatoscopy findings. *Dermatol*  
18 *Pract Concept* 2012. doi:10.5826/dpc.0202a12.  
19  
20 41 Eide MJ, Asgari MM, Fletcher SW, *et al.* Effects on skills and practice from a web-based  
21 skin cancer course for primary care providers. *J Am Board Fam Med* 2013.  
22 doi:10.3122/jabfm.2013.06.130108.  
23  
24 42 Mikkilineni R, Weinstock MA, Goldstein MG, *et al.* Impact of the basic skin cancer  
25 triage curriculum on providers' skin cancer control practices. *J Gen Intern Med* 2001.  
26 doi:10.1046/j.1525-1497.2001.00626.x.  
27  
28 43 Mikkilineni R, Weinstock MA, Goldstein MG, *et al.* The impact of the basic skin cancer  
29 triage curriculum on providers' skills, confidence, and knowledge in skin cancer control.  
30 *Prev Med (Baltim)* 2002. doi:10.1006/pmed.2001.0961.  
31  
32 44 Rogers T, Marino ML, Dusza SW, *et al.* A clinical aid for detecting skin cancer: The  
33 triage amalgamated dermoscopic algorithm (TADA). *J Am Board Fam Med* 2016.  
34 doi:10.3122/jabfm.2016.06.160079.  
35  
36 45 Secker LJ, Buis PAJ, Bergman W, Kukutsch NA. Effect of a dermoscopy training course  
37 on the accuracy of primary care physicians in diagnosing pigmented lesions. *Acta Derm*  
38 *Venereol* 2017. doi:10.2340/00015555-2526.  
39  
40 46 Beecher SM, Keogh C, Healy C. Dedicated general practitioner education sessions can  
41 improve diagnostic capabilities and may have a positive effect on referral patterns for  
42 common skin lesions. *Ir J Med Sci* 2018. doi:10.1007/s11845-018-1788-z.  
43  
44 47 Seiverling E V., Ahrns HT, Greene A, *et al.* Teaching benign skin lesions as a strategy  
45 to improve the triage amalgamated dermoscopic algorithm (TADA). *J Am Board Fam*  
46 *Med* 2019. doi:10.3122/jabfm.2019.01.180049.  
47  
48 48 Sawyers EA, Wigle DT, Marghoob AA, Blum A. Dermoscopy Training Effect on

- 1  
2  
3 Diagnostic Accuracy of Skin Lesions in Canadian Family Medicine Physicians Using  
4 the Triage Amalgamated Dermoscopic Algorithm. *Dermatol Pract Concept* 2020; **10**  
5 **(2)**. doi:10.5826/dpc.1002a35.  
6  
7  
8  
9 49 Youl PH, Raasch BA, Janda M, Aitken JF. The effect of an educational programme to  
10 improve the skills of general practitioners in diagnosing melanocytic/pigmented lesions.  
11 *Clin Exp Dermatol* 2007. doi:10.1111/j.1365-2230.2007.02414.x.  
12  
13 50 Grange F, Woronoff AS, Bera R, *et al*. Efficacy of a general practitioner training  
14 campaign for early detection of melanoma in France. *Br J Dermatol* 2014.  
15 doi:10.1111/bjd.12585.  
16  
17 51 Gulati A, Harwood CA, Rolph J, *et al*. Is an online skin cancer toolkit an effective way  
18 to educate primary care physicians about skin cancer diagnosis and referral? *J Eur Acad*  
19 *Dermatology Venereol* 2015. doi:10.1111/jdv.13167.  
20  
21 52 Girgis A, Sanson-Fisher RW, Howe C, Raffan B. A skin cancer training programme:  
22 evaluation of a postgraduate training for family doctors. *Med Educ* 1995.  
23 doi:10.1111/j.1365-2923.1995.tb00027.x.  
24  
25 53 Augustsson A, Paoli J. Effects of a 1-Day Training Course in Dermoscopy Among  
26 General Practitioners. *Dermatol Pract Concept* 2019; **9**:195–9.  
27 doi:10.5826/dpc.0903a04  
28  
29 54 Marra E, van Rijsingen MCJ, Alkemade JAC, *et al*. The effect of a dermato-oncologic  
30 training program on the diagnostic skills and quality of referrals for suspicious skin  
31 lesions by general practitioners. *Br J Dermatol* 2020. doi:10.1111/bjd.19214.  
32  
33 55 Shaikh WR, Geller A, Alexander G, *et al*. Developing an interactive web-based learning  
34 program on skin cancer: The learning experiences of clinical educators. *J Cancer Educ*  
35 2012. doi:10.1007/s13187-012-0378-4.  
36  
37 56 Badertscher N, Rosemann T, Tandjung R, Braun RP. MinSKIN Does a multifaceted  
38 intervention improve the competence in the diagnosis of skin cancer by general  
39 practitioners? Study protocol for a randomised controlled trial. *Trials* 2011.  
40 doi:10.1186/1745-6215-12-165.  
41  
42 57 Weinstock MA, Goldstein MG, Dubé CE, *et al*. Basic skin cancer triage for teaching  
43 melanoma detection. *J Am Acad Dermatol* 1996. doi:10.1016/S0190-9622(96)90287-X.  
44  
45 58 Friedman RJ, Rigel DS, Kopf AW. Early Detection of Malignant Melanoma: The Role  
46 of Physician Examination and Self-Examination of the Skin. *CA Cancer J Clin* 1985.  
47 doi:10.3322/canjclin.35.3.130.  
48  
49 59 Menzies SW. A method for the diagnosis of primary cutaneous melanoma using surface  
50  
51  
52  
53  
54  
55  
56  
57  
58  
59

- 1  
2  
3 microscopy. *Dermatol Clin* 2001. doi:10.1016/S0733-8635(05)70267-9.
- 4  
5 60 Stolz W, Riemann A, Cagnetta AB, *et al.* ABCD rule of dermoscopy: A new practical  
6 method for early recognition of malignant melanoma. *Eur J Dermatology* 1994.
- 7  
8 61 Argenziano G, Fabbrocini G, Carli P, *et al.* Epiluminescence Microscopy for the  
9 Diagnosis of Doubtful Melanocytic Skin Lesions. *Arch Dermatol* 1998.  
10 doi:10.1001/archderm.134.12.1563.
- 11  
12 62 Pagnanelli G, Soyer HP, Argenziano G, *et al.* Diagnosis of pigmented skin lesions by  
13 dermoscopy: Web-based training improves diagnostic performance of non-experts. *Br J*  
14 *Dermatol* 2003. doi:10.1046/j.1365-2133.2003.05168.x.
- 15  
16 63 Soyer HP, Argenziano G, Zalaudek I, *et al.* Three-point checklist of dermoscopy: A new  
17 screening method for early detection of melanoma. *Dermatology* 2004.  
18 doi:10.1159/000075042.
- 19  
20 64 Chappuis P, Duru G, Marchal O, *et al.* Dermoscopy, a useful tool for general  
21 practitioners in melanoma screening: a nationwide survey. *Br J Dermatol* 2016.  
22 doi:10.1111/bjd.14495.
- 23  
24 65 Oliveria SA, Heneghan MK, Cushman LF, *et al.* Skin cancer screening by  
25 dermatologists, family practitioners, and internists: Barriers and facilitating factors. *Arch*  
26 *Dermatol* 2011. doi:10.1001/archdermatol.2010.414.
- 27  
28 66 Kittler H, Pehamberger H, Wolff K, Binder M. Diagnostic accuracy of dermoscopy.  
29 *Lancet Oncol.* 2002. doi:10.1016/S1470-2045(02)00679-4.
- 30  
31 67 Jones OT, Jurascheck LC, Utukuri M, *et al.* Dermoscopy use in UK primary care: a  
32 survey of GPs with a special interest in dermatology. *J Eur Acad Dermatology Venereol*  
33 2019. doi:10.1111/jdv.15614.
- 34  
35 68 Weinstock MA, Ferris LK, Saul MI, *et al.* Downstream consequences of melanoma  
36 screening in a community practice setting: First results. *Cancer* 2016.  
37 doi:10.1002/cncr.30177.
- 38  
39 69 Robinson JK, Jain N, Marghoob AA, *et al.* A Randomized Trial on the Efficacy of  
40 Mastery Learning for Primary Care Provider Melanoma Opportunistic Screening Skills  
41 and Practice. *J Gen Intern Med* 2018. doi:10.1007/s11606-018-4311-3.
- 42  
43 70 Robinson JK, MacLean M, Reavy R, *et al.* Dermoscopy of Concerning Pigmented  
44 Lesions and Primary Care Providers' Referrals at Intervals After Randomized Trial of  
45 Mastery Learning. *J Gen Intern Med* 2018. doi:10.1007/s11606-018-4419-5.
- 46  
47 71 Woollard M, Whitfield R, Newcombe RG, *et al.* Optimal refresher training intervals for  
48 AED and CPR skills: A randomised controlled trial. *Resuscitation* 2006.
- 49  
50  
51  
52  
53  
54  
55  
56  
57  
58  
59  
60

1  
2  
3 doi:10.1016/j.resuscitation.2006.04.005.  
4

5 72 Lacy FA, Coman GC, Holliday AC, Kolodney MS. Assessment of smartphone  
6 application for teaching intuitive visual diagnosis of melanoma. *JAMA Dermatology*.  
7 2018. doi:10.1001/jamadermatol.2018.1525.  
8  
9

10 73 Nelson KC, Gershenwald JE, Savory SA, *et al*. Telementoring and smartphone-based  
11 answering systems to optimize dermatology resident dermoscopy education. *J Am Acad*  
12 *Dermatol* 2019. doi:10.1016/j.jaad.2019.01.045.  
13  
14  
15  
16  
17  
18  
19  
20  
21  
22  
23  
24  
25  
26  
27  
28  
29  
30  
31  
32  
33  
34  
35  
36  
37  
38  
39  
40  
41  
42  
43  
44  
45  
46  
47  
48  
49  
50  
51  
52  
53  
54  
55  
56  
57  
58  
59  
60

For peer review only

**Table 1. Inclusion and exclusion criteria for article selection**

|                                                                                                                                                                                                                                                                                                                                                                                                                                                                                                                                                                                                                                                                                                                                                                        |
|------------------------------------------------------------------------------------------------------------------------------------------------------------------------------------------------------------------------------------------------------------------------------------------------------------------------------------------------------------------------------------------------------------------------------------------------------------------------------------------------------------------------------------------------------------------------------------------------------------------------------------------------------------------------------------------------------------------------------------------------------------------------|
| <p><b>Inclusion criteria:</b></p> <p><b>Articles</b></p> <ul style="list-style-type: none"> <li>Articles written in English</li> <li>Study articles and descriptive articles of educational programs</li> </ul> <p><b>Population</b></p> <ul style="list-style-type: none"> <li>Qualified GPs and GP trainees working in community settings</li> </ul> <p><b>Intervention</b></p> <ul style="list-style-type: none"> <li>Studies evaluating educational programs in clinical (naked eye) diagnosis and/or diagnosis of melanoma using dermoscopy</li> </ul> <p><b>Outcome(s)</b></p> <ul style="list-style-type: none"> <li>Studies assessing the type of educational program and its short and/or the long-term efficacy on the skills acquired by the GPs</li> </ul> |
| <p><b>Exclusion criteria:</b></p> <p><b>Articles</b></p> <ul style="list-style-type: none"> <li>Articles not subject to peer review and written in languages other than English</li> </ul> <p><b>Population</b></p> <ul style="list-style-type: none"> <li>Studies involving specialists, medical students, non-GPs, GPs working in hospital settings and/or specialized skin cancer clinics</li> </ul> <p><b>Intervention</b></p> <ul style="list-style-type: none"> <li>Studies evaluating exclusively nonmelanoma skin cancer</li> <li>Teledermoscopy studies</li> <li>Studies on computer-aided diagnosis of melanoma</li> </ul> <p><b>Outcome(s)</b></p> <ul style="list-style-type: none"> <li>No method of measuring outcomes was ruled out</li> </ul>          |

*Key: GPs= general practitioners*



**Table 2. Definition of study categories**

| <b>Criteria</b>                    | <b>Categories</b>        | <b>Definition</b>                                                                                                                                                                                                                                                                                           |
|------------------------------------|--------------------------|-------------------------------------------------------------------------------------------------------------------------------------------------------------------------------------------------------------------------------------------------------------------------------------------------------------|
| <b>Training content</b>            | Epidemiology             | Background information on rates of melanoma cancer, risk factors, localization and evolution of melanomas                                                                                                                                                                                                   |
|                                    | Clinical diagnosis       | Naked eye melanoma recognition                                                                                                                                                                                                                                                                              |
|                                    | Clinical algorithm       | Use of a pre-existing algorithm as a learning tool to aid for clinical diagnosis                                                                                                                                                                                                                            |
|                                    | Dermoscopic diagnosis    | Recognition of melanoma using dermoscopy                                                                                                                                                                                                                                                                    |
|                                    | Dermoscopic algorithm    | Use of an algorithm as a learning tool to aid for dermoscopic diagnosis                                                                                                                                                                                                                                     |
|                                    | Management               | Determination of a plan of action for a skin lesion i.e. reassurance, follow-up, or lesion excision                                                                                                                                                                                                         |
| <b>Teaching method</b>             | Live                     | Presentation by a speaker to a group of participants                                                                                                                                                                                                                                                        |
|                                    | Scientific literature    | Use of educational books, posters, letters, CD-ROMs or videos                                                                                                                                                                                                                                               |
|                                    | E-learning               | Interactive online tutorials including audio and visual information                                                                                                                                                                                                                                         |
|                                    | Self-assessment          | Learning by the participant himself using educational material                                                                                                                                                                                                                                              |
| <b>Refresher training material</b> | Teledermatology feedback | Feedback from a dermatologist on the image and clinical history of a suspicious lesion at a distance, using remote internet-based technologies                                                                                                                                                              |
| <b>Outcome measures</b>            | Competences              | Acquired skills, which are evaluated in a training setting on clinical and/or dermoscopic photographs of skin lesions                                                                                                                                                                                       |
|                                    | Diagnostic accuracy      | Ability of the participants to discriminate between melanoma and benign lesions                                                                                                                                                                                                                             |
|                                    | Knowledge                | Report of conceptual understanding                                                                                                                                                                                                                                                                          |
|                                    | Appropriate management   | Determination of the right plan of action for a skin lesion                                                                                                                                                                                                                                                 |
|                                    | Performances             | Changes in real-life practice measured in a clinical setting, i.e. changes in the benign/malignant ratio of excised lesions, the number of total-body skin examinations performed, confidence of the GPs, changes in referral rates to a dermatologist, and decrease in the incidence of advanced melanomas |
| <b>Evaluation</b>                  | Short-term               | Measurement of outcomes immediately or up to 3 months after the training                                                                                                                                                                                                                                    |
|                                    | Long-term                | Measurement of outcomes at $\geq 6$ months after the training                                                                                                                                                                                                                                               |

**Table 3. Characteristics of educational programs in melanoma diagnosis for general practitioners**

| Article                                                  | Study design       | Study participants       | Training content |                    |                    |                       |                       |            | Teaching method                 | Training duration                    | Refresher training material |
|----------------------------------------------------------|--------------------|--------------------------|------------------|--------------------|--------------------|-----------------------|-----------------------|------------|---------------------------------|--------------------------------------|-----------------------------|
|                                                          |                    |                          | Epidemiology     | Clinical diagnosis | Clinical algorithm | Dermoscopic diagnosis | Dermoscopic algorithm | Management |                                 |                                      |                             |
| author, year, location <sup>ref</sup>                    |                    |                          |                  |                    |                    |                       |                       |            |                                 |                                      |                             |
| Marra, 2020, The Netherlands <sup>54</sup>               | Case-control study | 185 (83; 102)*           |                  | X                  |                    | X (optional)          |                       | X          | e-learning                      | 2h                                   |                             |
| Sawyers, 2020, Canada <sup>48</sup>                      | DA study           | 33 GPs                   |                  |                    |                    | X                     | TADA step-I           |            | Live                            | 3.5h                                 |                             |
| Augustsson, 2019, Sweden <sup>53</sup>                   | Case-control study | 43 GPs (27;16)*          |                  |                    |                    | X                     | Pattern analysis      |            | Live                            | 1-day                                | PDF-files of the course     |
| Seiverling, 2019, USA <sup>47</sup>                      | DA study           | 59 GPs                   |                  | X                  |                    | X                     | TADA                  |            | Live                            | 75min                                |                             |
| Beecher, 2018, Ireland <sup>46</sup>                     | DA study           | 23 GP trainees           | X                | X                  |                    |                       |                       | X          | Live, Literature                | 1h                                   |                             |
| Secker, 2017, The Netherlands <sup>45</sup>              | DA study           | 293 PCPs including ? GPs |                  | X                  |                    | X                     |                       | X          | Live, Literature and E-learning | 1-day                                |                             |
| Rogers, 2016, USA <sup>44</sup>                          | DA study           | 16 GPs                   |                  |                    |                    | X                     | TADA                  |            | Live                            | 1-day                                |                             |
| Badertscher, 2011 and 2015, Switzerland <sup>56,29</sup> | RCT                | 78 GPs (39;39)*          |                  | X                  |                    | Lumio®                |                       |            | Live                            | 1-day                                | Teledermatology feedback    |
| Gulati, 2015, UK <sup>51</sup>                           | Cohort study       | 967 GPs                  | X                | X                  |                    |                       |                       | X          | E-learning                      | PD                                   |                             |
| Koelink, 2014, The Netherlands <sup>10</sup>             | RCT                | 53 GPs                   | X                | X                  |                    | X                     | 7-point checklist     |            | Live                            | 4h clinical diagnosis; 6h dermoscopy |                             |
| Grange, 2013, France <sup>50</sup>                       | Cohort study       | 398 GPs                  | X                | X                  |                    |                       |                       |            | Live, Literature                | 2.5h                                 | CD-ROM+ regular             |

|                                                                                    |                     |                               |   |   |                              |                                     |                                             |   |                                   |                       |                                               |
|------------------------------------------------------------------------------------|---------------------|-------------------------------|---|---|------------------------------|-------------------------------------|---------------------------------------------|---|-----------------------------------|-----------------------|-----------------------------------------------|
|                                                                                    |                     |                               |   |   |                              |                                     |                                             |   |                                   |                       | information sheets                            |
| Markova, 2013, USA <sup>28</sup>                                                   | RCT                 | 46 GPs (20;26)*               |   |   | ABCD(E)                      |                                     |                                             |   | E-learning                        |                       |                                               |
| Mikkilineni, 2001 and 2002, USA <sup>42,43</sup><br>(Weinstock 1996) <sup>57</sup> | DA study            | 7 GPs                         | X | X |                              |                                     |                                             | X | Live Literature                   | 2h                    |                                               |
| Eide, 2013, <sup>41</sup><br>(Shaikh, 2012) <sup>55</sup><br>INFORMED              | DA study            | 54 PCPs including 9 GPs (20%) | X | X | ABCD(E) + Ugly duckling sign | X                                   | Three-point checklist                       | X | E-learning, Self-assessment       | 2h web-based learning | Unlimited e-learning access                   |
| Bourne, 2012, Australia <sup>40</sup>                                              | DA study            | 3 GPs                         |   | X |                              | X                                   | BLINCK Three-point checklist Menzies method |   | Live, Literature                  | UD                    |                                               |
| Shariff, 2010, UK <sup>39</sup>                                                    | DA study            | 94 GPs                        |   | X |                              |                                     |                                             |   | Literature                        | PD                    |                                               |
| Grimaldi, 2009, Italy <sup>38</sup>                                                | DA study            | 13 GPs                        |   | X |                              | X                                   | ABCD rule                                   |   | Live, E-learning, Self-assessment | PD                    | Self-assessment e-learning training sessions  |
| Menzies, 2009, Australia <sup>37</sup>                                             | DA study            | 63 GPs                        |   | X |                              | Yes + Sequential digital dermoscopy | Menzies method                              |   | Live, Literature, E-learning      | 2h-workshop           | Unlimited e-learning access                   |
| Peuvrel, 2009, France <sup>36</sup>                                                | DA study            | 210 GPs                       | X | X | ABCD(E)                      |                                     |                                             | X | Live, Literature (CD-ROM)         | 2h                    | CD-ROM                                        |
| Youl, 2007, Australia <sup>49</sup><br>Raasch, 2000, Australia <sup>23</sup>       | Cohort study<br>RCT | 16 GPs<br>46 GPs              | X | X | ABCD(E)                      | X                                   |                                             | X | Literature                        | PD                    | Self-assessment paper-based training sessions |

|                                                |          |                       |   |                                      |                                         |   |                                                                      |   |                                               |         |                                         |
|------------------------------------------------|----------|-----------------------|---|--------------------------------------|-----------------------------------------|---|----------------------------------------------------------------------|---|-----------------------------------------------|---------|-----------------------------------------|
|                                                |          | (23;23)*              |   |                                      |                                         |   |                                                                      |   |                                               |         |                                         |
| Argenziano, 2006, Italy and Spain <sup>9</sup> | RCT      | 73 GPs<br>(36;37)*    |   | X                                    | ABCD                                    | X | Three-point checklist                                                |   | Live                                          | 1-day   |                                         |
| Dolianitis, 2005, Australia <sup>35</sup>      | DA study | 35 GPs                |   |                                      |                                         | X | Menzies method<br>7-point checklist<br>ABCD rule<br>Pattern analysis |   | Literature,<br>E-learning,<br>Self-assessment | PD      |                                         |
| Carli, 2005, Italy <sup>34</sup>               | DA study | 41 GPs                | X | X                                    | ABCD(E)                                 |   |                                                                      | X | Live                                          | 4h      |                                         |
| De Gannes, 2004, Canada <sup>27</sup>          | RCT      | 27 GPs<br>(10;17)*    | X | X                                    |                                         |   |                                                                      |   | Literature<br>(Video-format)                  | 12min   | Unlimited access to the 12-minute Video |
| English, 2003, Australia <sup>26</sup>         | RCT      | 468 GPs<br>(245;228)* |   | X +<br>Polaroid<br>instant<br>camera |                                         |   |                                                                      | X | Literature                                    | >6h     |                                         |
| Del Mar, 1995, Australia <sup>20</sup>         | RCT      | 93 GPs<br>(48;45)*    |   |                                      |                                         |   |                                                                      |   |                                               | 1h      |                                         |
| Brochez, 2001, Belgium <sup>33</sup>           | DA study | 146 GPs               | X | X                                    |                                         |   |                                                                      | X | Live,<br>Literature                           | 2h      |                                         |
| Harris, 1999 and 2001, USA <sup>30,32</sup>    | DA study | 232 GPs<br>17 GPs     | X | X                                    | ABCD<br>7-point<br>Glasgow<br>checklist |   |                                                                      | X | Literature,<br>E-learning                     | 1h      |                                         |
| Westerhoff, Australia 2000 <sup>24</sup>       | RCT      | 74 GPs                |   |                                      |                                         | X | Menzies method                                                       |   | Live,<br>Literature                           | 1h live |                                         |
| Bedlow, 2000, UK <sup>31</sup>                 | DA study | 17 GPs                |   | X                                    |                                         |   |                                                                      |   | Live,<br>Literature                           | UD      |                                         |
| Gerbert, 1998 and 2002, USA <sup>22,25</sup>   | RCT      | 52 GPs<br>(26;26)*    | X | X                                    |                                         |   |                                                                      | X | Live,<br>Literature,<br>E-learning            | >3h     |                                         |

|                                       |                    |                                   |   |   |  |  |  |   |                  |     |  |
|---------------------------------------|--------------------|-----------------------------------|---|---|--|--|--|---|------------------|-----|--|
| Dolan, 1997, USA <sup>21</sup>        | RCT                | 82 PCPs including 16 GPs (46;36)* | X | X |  |  |  |   | Live             | 2h  |  |
| Girgis, 1995, Australia <sup>52</sup> | Case-control study | 41 GPs (24;17)*                   | X | X |  |  |  | X | Live, literature | >6h |  |

*Key: GPs=general practitioners; PCPs= primary care physicians; RCT= randomized controlled trial; DA= diagnostic accuracy; INFORMED= Internet curriculum for melanoma early detection; PD= participant dependent; UD=undisclosed; TADA=trriage amalgamated dermoscopic algorithm*

*\*number of participants in the intervention group and control group*

For peer review only

**Table 4. Outcome measures of the melanoma diagnostic educational programs for general practitioners.**

| <b>A. Studies with short-term outcomes</b>      |                                                |                  |           |                                                 |             |           |                   |                                  |           |                                  |                   |                    |
|-------------------------------------------------|------------------------------------------------|------------------|-----------|-------------------------------------------------|-------------|-----------|-------------------|----------------------------------|-----------|----------------------------------|-------------------|--------------------|
| <b>Studies</b>                                  | <b>Measured competence in training setting</b> |                  |           | <b>Measured performance in clinical setting</b> |             |           |                   |                                  |           | <b>Timing after the training</b> |                   |                    |
| (1st author and year of publication)            | <b>DA</b>                                      | <b>Knowledge</b> | <b>AM</b> | <b>B/M lesion ratio</b>                         | <b>TBSE</b> | <b>DA</b> | <b>confidence</b> | <b>Decrease of VTM incidence</b> | <b>RR</b> | <b>immediately</b>               | <b>at 1 month</b> | <b>at 3 months</b> |
| <b>Dermoscopic diagnostic training programs</b> |                                                |                  |           |                                                 |             |           |                   |                                  |           |                                  |                   |                    |
| Sawyers 2020 <sup>48</sup>                      | +                                              |                  |           |                                                 |             |           |                   |                                  |           | X                                |                   |                    |
| Seiverling 2019 <sup>47</sup>                   | +                                              |                  |           |                                                 |             |           |                   |                                  |           | X                                |                   |                    |
| Secker 2017 <sup>45</sup>                       | +                                              |                  | +         |                                                 |             |           |                   |                                  |           |                                  |                   | X                  |
| Rogers 2016 <sup>44</sup>                       | +                                              |                  |           |                                                 |             |           |                   |                                  |           | X                                |                   |                    |
| Bourne 2012 <sup>40</sup>                       | +                                              |                  |           |                                                 |             |           |                   |                                  |           | X                                |                   |                    |
| Dolianitis 2005 <sup>35</sup>                   | +                                              |                  |           |                                                 |             |           |                   |                                  |           | X                                |                   |                    |
| Westerhoff 2000 <sup>24</sup>                   | +                                              | +                |           |                                                 |             |           |                   |                                  |           | X                                |                   |                    |
| <b>Clinical diagnostic training programs</b>    |                                                |                  |           |                                                 |             |           |                   |                                  |           |                                  |                   |                    |
| Beecher, 2018 <sup>46</sup>                     | +                                              | +                | +         |                                                 |             |           |                   |                                  |           | X                                |                   | X                  |
| Carli 2005 <sup>34</sup>                        | +                                              |                  | +         |                                                 |             |           |                   |                                  |           | X                                |                   |                    |
| Mikkilineni 2001;2002 <sup>42,43</sup>          |                                                | +                | +         |                                                 | +           |           | +                 |                                  |           | X                                |                   |                    |
| Brochez 2001 <sup>33</sup>                      | +                                              |                  |           |                                                 |             |           |                   |                                  |           | X                                |                   |                    |
| Harris 2001 <sup>32</sup>                       | +                                              | +                | +         |                                                 |             |           | +                 |                                  |           | X                                |                   |                    |
| Harris 1999 <sup>30</sup>                       | +                                              | -                | +         |                                                 |             |           | +                 |                                  |           | X                                |                   |                    |
| Raasch 2000 <sup>23</sup>                       | -                                              |                  |           |                                                 |             |           | +                 |                                  |           | 3-month period                   |                   |                    |
| Bedlow 2000 <sup>31</sup>                       | +                                              | +                |           |                                                 |             |           |                   |                                  |           | X                                |                   |                    |
| Gerbert 1998;2002 <sup>22,25</sup>              | +                                              | +                | +         |                                                 |             |           | +                 |                                  |           | X                                |                   |                    |
| Dolan 1997 <sup>21</sup>                        | -                                              | +                | -         |                                                 |             |           |                   |                                  |           | X                                | X                 |                    |
| Girgis 1995 <sup>52</sup>                       | -                                              | +                |           |                                                 |             |           | +                 |                                  |           | X                                |                   | X                  |

| <b>B. Studies with long-term outcomes</b>           |                                         |           |    |                                          |                |                                          |            |                           |            |                           |                           |                                          |              |              |
|-----------------------------------------------------|-----------------------------------------|-----------|----|------------------------------------------|----------------|------------------------------------------|------------|---------------------------|------------|---------------------------|---------------------------|------------------------------------------|--------------|--------------|
| Studies                                             | Measured competence in training setting |           |    | Measured performance in clinical setting |                |                                          |            |                           |            | Timing after the training |                           |                                          |              |              |
|                                                     | DA                                      | Knowledge | AM | M/B lesion ratio                         | TBSE           | DA                                       | Confidence | Decrease of VTM incidence | RR         |                           |                           |                                          |              |              |
| <b>Dermoscopic diagnostic training programs</b>     |                                         |           |    |                                          |                |                                          |            |                           |            |                           |                           |                                          |              |              |
| Shariff 2010 <sup>39</sup>                          |                                         |           |    |                                          |                | -                                        |            |                           |            |                           | at 11 months              |                                          |              |              |
| Youl 2007 <sup>49</sup>                             |                                         |           |    | +                                        |                | +                                        |            |                           |            |                           | 6-month period            |                                          |              |              |
| Argenziano 2006 <sup>9</sup>                        |                                         |           |    |                                          |                | +                                        |            |                           |            | +                         | 16-month period           |                                          |              |              |
| <b>Clinical diagnostic training programs</b>        |                                         |           |    |                                          |                |                                          |            |                           |            |                           |                           |                                          |              |              |
| Gulati 2015 <sup>51</sup>                           |                                         |           |    |                                          |                | -                                        | +          |                           |            |                           | 8-month period            |                                          |              |              |
| Peuvrel 2009 <sup>36</sup>                          |                                         | +         |    |                                          |                |                                          | +          |                           |            |                           | 15-month period           |                                          |              |              |
| De Gannes 2004 <sup>27</sup>                        | -                                       | -         | -  |                                          |                |                                          |            |                           |            |                           | at 6 months               |                                          |              |              |
| English 2003 <sup>26</sup>                          |                                         |           |    |                                          |                | -                                        |            |                           |            |                           | 21-month period           |                                          |              |              |
| Del Mar 1995 <sup>20</sup>                          |                                         |           |    |                                          |                | +                                        |            |                           |            |                           | 24-month period           |                                          |              |              |
| <b>C. Studies with short and long-term outcomes</b> |                                         |           |    |                                          |                |                                          |            |                           |            |                           |                           |                                          |              |              |
| Studies                                             | Measured competence in training setting |           |    | Timing after the training                |                | Measured performance in clinical setting |            |                           |            |                           | Timing after the training |                                          |              |              |
|                                                     | DA                                      | Knowledge | AM | Immediately after                        | at 1-3 months  | B/M lesion ratio                         | TBSE       | DA                        | Confidence | Decrease of VTM incidence | RR                        |                                          |              |              |
| <b>Dermoscopic diagnostic training programs</b>     |                                         |           |    |                                          |                |                                          |            |                           |            |                           |                           |                                          |              |              |
| Augustsson 2019 <sup>53</sup>                       | +                                       |           |    | X                                        |                |                                          |            |                           |            |                           |                           | at 6 months<br>(here competence measure) |              |              |
| Badertscher 2015 <sup>29</sup>                      | +                                       |           |    | X                                        |                |                                          |            | -                         | +          |                           |                           | at 12 months                             |              |              |
| Koelink 2014 <sup>10</sup>                          | +                                       |           | +  | X                                        |                |                                          |            | +                         | +          |                           |                           | at 8 months                              | at 12 months | at 19 months |
| Eide 2013 <sup>41</sup>                             | +                                       | +         | +  | X                                        |                |                                          |            | +                         | +          |                           | +                         | at 6 months                              |              |              |
| Youl 2007 <sup>49</sup>                             |                                         |           |    |                                          |                | +                                        |            | +                         |            |                           |                           | 6-month period                           |              |              |
|                                                     | -                                       |           |    |                                          | 3-month period |                                          |            |                           |            |                           |                           |                                          |              |              |

1  
2  
3  
4  
5  
6  
7  
8  
9  
10  
11  
12  
13  
14  
15  
16  
17  
18  
19  
20  
21  
22  
23  
24  
25  
26  
27  
28  
29  
30  
31  
32  
33  
34  
35  
36  
37  
38  
39  
40  
41  
42  
43  
44  
45  
46

|                                              |   |   |   |   |   |  |   |   |   |   |   |                |
|----------------------------------------------|---|---|---|---|---|--|---|---|---|---|---|----------------|
| Raasch<br>2000 <sup>23</sup>                 |   |   |   |   |   |  |   |   |   |   |   |                |
| Grimaldi<br>2009 <sup>38</sup>               | + |   |   | X | X |  |   | + |   |   |   | 6-month period |
| Menzies<br>2009 <sup>37</sup>                | + |   | + | X |   |  | + |   |   |   | + | 6-month period |
| <b>Clinical diagnostic training programs</b> |   |   |   |   |   |  |   |   |   |   |   |                |
| Marra,<br>2020 <sup>54</sup>                 | + |   |   |   | X |  |   | + | + |   | + | at 10 months   |
| Grange<br>2013 <sup>50</sup>                 | + | + |   | X |   |  |   |   |   | + |   | 3-year period  |
| Markova<br>2013 <sup>28</sup>                |   |   |   |   |   |  | - |   |   |   |   | at 12 months   |
| Mikkilineni<br>2001; 2002<br>42,43           |   | + | + | X |   |  |   |   |   |   |   |                |

*Key: DA= diagnostic accuracy; AM=appropriate management; TBSE= total body skin examination; B/M=benign/malignant; VTM= very thick melanomas; RR= decrease in dermatologist referral rates for benign lesions and increase in referral rates for malignant lesions*  
 + = significant improvement; - = no significant improvement  
 To note that Shariff et al.<sup>37</sup> and Peuvrel et al.<sup>34</sup> provided only descriptive statistics of their study results. For the other studies, a P-value < 0.05 was considered significant, except for Grimaldi et al.<sup>36</sup> (P-value < 0.001).



**Figure 1.** PRISMA flowchart of study selection process<sup>17</sup>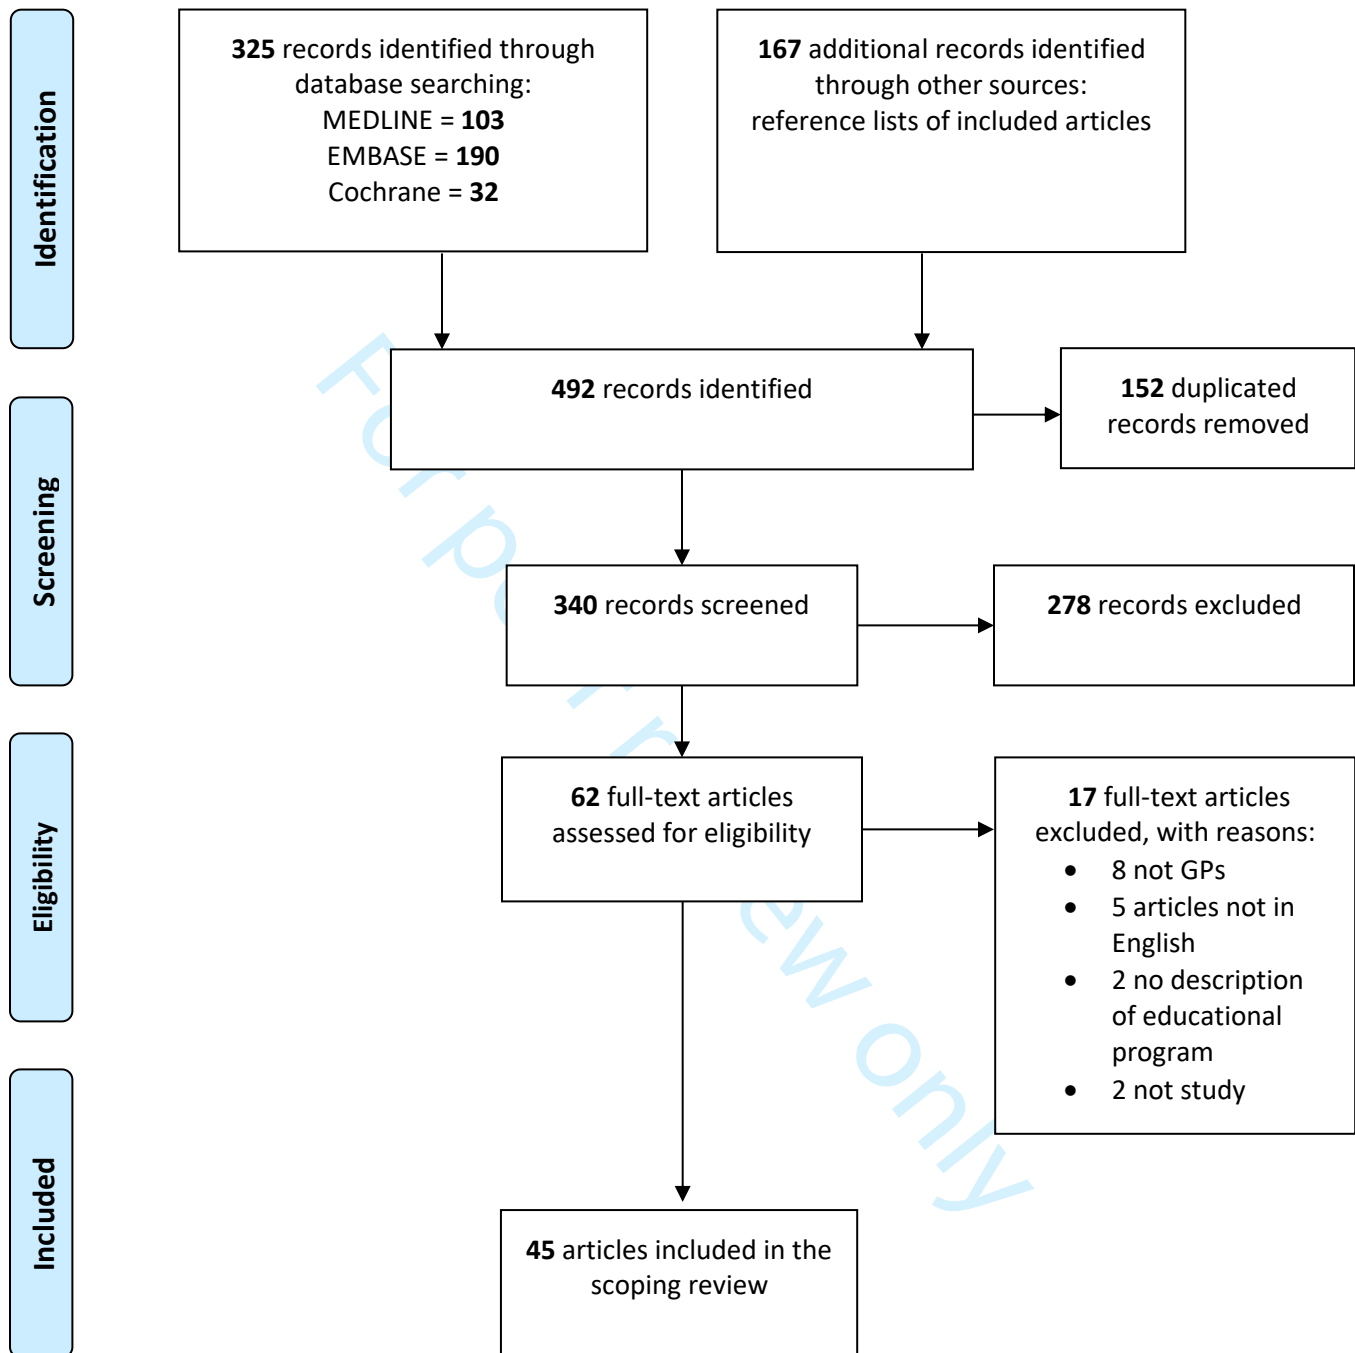

**Supplementary Table 1: Search strategies**

| Database         | Search query                                                                                                                                                                                                                                                                                                                                                                                                                                                                                                                                                                                                                | Limits | Filters | Results | Date          |
|------------------|-----------------------------------------------------------------------------------------------------------------------------------------------------------------------------------------------------------------------------------------------------------------------------------------------------------------------------------------------------------------------------------------------------------------------------------------------------------------------------------------------------------------------------------------------------------------------------------------------------------------------------|--------|---------|---------|---------------|
| EMBASE           | ('general practitioner'/exp OR 'gp (general practitioner)' OR 'family doctor' OR 'family physician' OR 'general practitioner' OR 'general practitioners' OR 'physicians, family' OR 'physicians, primary care' OR 'practitioner, general' OR 'primary care doctor' OR 'primary care physician' OR 'primary care physicians') AND ('education'/exp OR 'education' OR 'self-evaluation programmes' OR 'self-evaluation programs' OR 'training support') AND ('melanoma'/exp OR 'malignant melanoma' OR 'melanoma' OR 'nevi and melanomas' OR 'naevi and melanomas') AND ('diagnosis'/exp OR 'diagnosis' OR 'diagnostic tool') | none   | none    | 190     | 4 May 2020    |
| MEDLINE          | "('General Practitioners'[MeSH Terms] OR 'General Practice'[MeSH Terms] OR 'Family Practice'[MeSH Terms] OR 'physicians, primary care'[MeSH Terms]) AND 'Melanoma'[MeSH Terms] AND 'Diagnosis'[MeSH Terms]"                                                                                                                                                                                                                                                                                                                                                                                                                 | none   | none    | 103     | 27 April 2020 |
| Cochrane Library | melanoma in Title Abstract Keyword AND diagnosis in Title Abstract Keyword AND general practitioner in Title Abstract Keyword OR family medicine in Title Abstract Keyword AND dermoscopy in Title Abstract Keyword (Word variations have been searched)                                                                                                                                                                                                                                                                                                                                                                    | none   | none    | 32      | 28 April 2020 |

## Preferred Reporting Items for Systematic reviews and Meta-Analyses extension for Scoping Reviews (PRISMA-ScR) Checklist

| SECTION                                               | ITEM | PRISMA-ScR CHECKLIST ITEM                                                                                                                                                                                                                                                                                  | REPORTED ON PAGE # |
|-------------------------------------------------------|------|------------------------------------------------------------------------------------------------------------------------------------------------------------------------------------------------------------------------------------------------------------------------------------------------------------|--------------------|
| <b>TITLE</b>                                          |      |                                                                                                                                                                                                                                                                                                            |                    |
| Title                                                 | 1    | Identify the report as a scoping review.                                                                                                                                                                                                                                                                   | 1                  |
| <b>ABSTRACT</b>                                       |      |                                                                                                                                                                                                                                                                                                            |                    |
| Structured summary                                    | 2    | Provide a structured summary that includes (as applicable): background, objectives, eligibility criteria, sources of evidence, charting methods, results, and conclusions that relate to the review questions and objectives.                                                                              | 2                  |
| <b>INTRODUCTION</b>                                   |      |                                                                                                                                                                                                                                                                                                            |                    |
| Rationale                                             | 3    | Describe the rationale for the review in the context of what is already known. Explain why the review questions/objectives lend themselves to a scoping review approach.                                                                                                                                   | 4                  |
| Objectives                                            | 4    | Provide an explicit statement of the questions and objectives being addressed with reference to their key elements (e.g., population or participants, concepts, and context) or other relevant key elements used to conceptualize the review questions and/or objectives.                                  | 4                  |
| <b>METHODS</b>                                        |      |                                                                                                                                                                                                                                                                                                            |                    |
| Protocol and registration                             | 5    | Indicate whether a review protocol exists; state if and where it can be accessed (e.g., a Web address); and if available, provide registration information, including the registration number.                                                                                                             | N.A.               |
| Eligibility criteria                                  | 6    | Specify characteristics of the sources of evidence used as eligibility criteria (e.g., years considered, language, and publication status), and provide a rationale.                                                                                                                                       | 5                  |
| Information sources*                                  | 7    | Describe all information sources in the search (e.g., databases with dates of coverage and contact with authors to identify additional sources), as well as the date the most recent search was executed.                                                                                                  | 5-6                |
| Search                                                | 8    | Present the full electronic search strategy for at least 1 database, including any limits used, such that it could be repeated.                                                                                                                                                                            | 6                  |
| Selection of sources of evidence†                     | 9    | State the process for selecting sources of evidence (i.e., screening and eligibility) included in the scoping review.                                                                                                                                                                                      | 6                  |
| Data charting process‡                                | 10   | Describe the methods of charting data from the included sources of evidence (e.g., calibrated forms or forms that have been tested by the team before their use, and whether data charting was done independently or in duplicate) and any processes for obtaining and confirming data from investigators. | 6                  |
| Data items                                            | 11   | List and define all variables for which data were sought and any assumptions and simplifications made.                                                                                                                                                                                                     | Table 2            |
| Critical appraisal of individual sources of evidence§ | 12   | If done, provide a rationale for conducting a critical appraisal of included sources of evidence; describe the methods used and how this information was used in any data synthesis (if appropriate).                                                                                                      | 5                  |

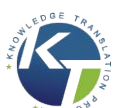

| SECTION                                       | ITEM | PRISMA-ScR CHECKLIST ITEM                                                                                                                                                                       | REPORTED ON PAGE # |
|-----------------------------------------------|------|-------------------------------------------------------------------------------------------------------------------------------------------------------------------------------------------------|--------------------|
| Synthesis of results                          | 13   | Describe the methods of handling and summarizing the data that were charted.                                                                                                                    | 6                  |
| <b>RESULTS</b>                                |      |                                                                                                                                                                                                 |                    |
| Selection of sources of evidence              | 14   | Give numbers of sources of evidence screened, assessed for eligibility, and included in the review, with reasons for exclusions at each stage, ideally using a flow diagram.                    | <b>Figure 1</b>    |
| Characteristics of sources of evidence        | 15   | For each source of evidence, present characteristics for which data were charted and provide the citations.                                                                                     | <b>Table 3</b>     |
| Critical appraisal within sources of evidence | 16   | If done, present data on critical appraisal of included sources of evidence (see item 12).                                                                                                      | <b>N.A.</b>        |
| Results of individual sources of evidence     | 17   | For each included source of evidence, present the relevant data that were charted that relate to the review questions and objectives.                                                           | <b>Table 3</b>     |
| Synthesis of results                          | 18   | Summarize and/or present the charting results as they relate to the review questions and objectives.                                                                                            | <b>7-8</b>         |
| <b>DISCUSSION</b>                             |      |                                                                                                                                                                                                 |                    |
| Summary of evidence                           | 19   | Summarize the main results (including an overview of concepts, themes, and types of evidence available), link to the review questions and objectives, and consider the relevance to key groups. | <b>9-10-11</b>     |
| Limitations                                   | 20   | Discuss the limitations of the scoping review process.                                                                                                                                          | <b>12</b>          |
| Conclusions                                   | 21   | Provide a general interpretation of the results with respect to the review questions and objectives, as well as potential implications and/or next steps.                                       | <b>13</b>          |
| <b>FUNDING</b>                                |      |                                                                                                                                                                                                 |                    |
| Funding                                       | 22   | Describe sources of funding for the included sources of evidence, as well as sources of funding for the scoping review. Describe the role of the funders of the scoping review.                 | <b>1</b>           |

JBI = Joanna Briggs Institute; PRISMA-ScR = Preferred Reporting Items for Systematic reviews and Meta-Analyses extension for Scoping Reviews.

\* Where *sources of evidence* (see second footnote) are compiled from, such as bibliographic databases, social media platforms, and Web sites.

† A more inclusive/heterogeneous term used to account for the different types of evidence or data sources (e.g., quantitative and/or qualitative research, expert opinion, and policy documents) that may be eligible in a scoping review as opposed to only studies. This is not to be confused with *information sources* (see first footnote).

‡ The frameworks by Arksey and O'Malley (6) and Levac and colleagues (7) and the JBI guidance (4, 5) refer to the process of data extraction in a scoping review as data charting.

§ The process of systematically examining research evidence to assess its validity, results, and relevance before using it to inform a decision. This term is used for items 12 and 19 instead of "risk of bias" (which is more applicable to systematic reviews of interventions) to include and acknowledge the various sources of evidence that may be used in a scoping review (e.g., quantitative and/or qualitative research, expert opinion, and policy document).

From: Tricco AC, Lillie E, Zarin W, O'Brien KK, Colquhoun H, Levac D, et al. PRISMA Extension for Scoping Reviews (PRISMA-ScR): Checklist and Explanation. *Ann Intern Med.* 2018;169:467–473. doi: [10.7326/M18-0850](https://doi.org/10.7326/M18-0850).



**St. Michael's**

Inspired Care.  
Inspiring Science.

For peer review only - <http://bmjopen.bmj.com/site/about/guidelines.xhtml>

# BMJ Open

## Training general practitioners in melanoma diagnosis: a scoping review of the literature.

|                                 |                                                                                                                                                                                                                                                                                                                                                                                                                                           |
|---------------------------------|-------------------------------------------------------------------------------------------------------------------------------------------------------------------------------------------------------------------------------------------------------------------------------------------------------------------------------------------------------------------------------------------------------------------------------------------|
| Journal:                        | <i>BMJ Open</i>                                                                                                                                                                                                                                                                                                                                                                                                                           |
| Manuscript ID                   | bmjopen-2020-043926.R2                                                                                                                                                                                                                                                                                                                                                                                                                    |
| Article Type:                   | Original research                                                                                                                                                                                                                                                                                                                                                                                                                         |
| Date Submitted by the Author:   | 03-Mar-2021                                                                                                                                                                                                                                                                                                                                                                                                                               |
| Complete List of Authors:       | Harkemanne, Evelyne; Cliniques universitaires Saint-Luc, Dermatology; Université catholique de Louvain Institut de Recherche Expérimentale et Clinique<br>Baeck, Marie; Cliniques universitaires Saint-Luc, Dermatology; Université catholique de Louvain Institut de Recherche Expérimentale et Clinique<br>Tromme, Isabelle; Cliniques universitaires Saint-Luc, Dermatology; Cliniques universitaires Saint-Luc Institut Roi Albert II |
| <b>Primary Subject Heading</b>: | General practice / Family practice                                                                                                                                                                                                                                                                                                                                                                                                        |
| Secondary Subject Heading:      | Dermatology, Medical education and training, Diagnostics                                                                                                                                                                                                                                                                                                                                                                                  |
| Keywords:                       | GENERAL MEDICINE (see Internal Medicine), Dermatological tumours < DERMATOLOGY, EDUCATION & TRAINING (see Medical Education & Training)                                                                                                                                                                                                                                                                                                   |
|                                 |                                                                                                                                                                                                                                                                                                                                                                                                                                           |

SCHOLARONE™  
Manuscripts



I, the Submitting Author has the right to grant and does grant on behalf of all authors of the Work (as defined in the below author licence), an exclusive licence and/or a non-exclusive licence for contributions from authors who are: i) UK Crown employees; ii) where BMJ has agreed a CC-BY licence shall apply, and/or iii) in accordance with the terms applicable for US Federal Government officers or employees acting as part of their official duties; on a worldwide, perpetual, irrevocable, royalty-free basis to BMJ Publishing Group Ltd ("BMJ") its licensees and where the relevant Journal is co-owned by BMJ to the co-owners of the Journal, to publish the Work in this journal and any other BMJ products and to exploit all rights, as set out in our [licence](#).

The Submitting Author accepts and understands that any supply made under these terms is made by BMJ to the Submitting Author unless you are acting as an employee on behalf of your employer or a postgraduate student of an affiliated institution which is paying any applicable article publishing charge ("APC") for Open Access articles. Where the Submitting Author wishes to make the Work available on an Open Access basis (and intends to pay the relevant APC), the terms of reuse of such Open Access shall be governed by a Creative Commons licence – details of these licences and which [Creative Commons](#) licence will apply to this Work are set out in our licence referred to above.

Other than as permitted in any relevant BMJ Author's Self Archiving Policies, I confirm this Work has not been accepted for publication elsewhere, is not being considered for publication elsewhere and does not duplicate material already published. I confirm all authors consent to publication of this Work and authorise the granting of this licence.

# Training general practitioners in melanoma diagnosis: a scoping review of the literature

E. Harkemanne M.D.,<sup>1,2</sup> M. Baeck M.D. Ph.D.,<sup>1,2</sup> I. Tromme M.D. Ph.D.<sup>1,2,3</sup>

<sup>1</sup>Dermatology department, Cliniques universitaires Saint-Luc, Brussels, Belgium

<sup>2</sup>Institute of Experimental and Clinical Research (IREC), UCLouvain, Brussels, Belgium

<sup>3</sup>King Albert II Cancer and Hematology Institute, Cliniques universitaires Saint-Luc, Brussels, Belgium

## Corresponding Author:

Evelyne Harkemanne, M.D.

Dermatology department

Cliniques universitaires Saint-Luc

Avenue Hippocrate, 10

B-1200 Brussels, Belgium

Email: evelyne.harkemanne@uclouvain.be

**Funding sources:** None

**Conflict of Interest:** None declared

**Reprint requests:** Evelyne Harkemanne

**Manuscript word count:** 3345

**Figure:** 1

**Tables:** 4

**Supplementary table:** 1

## **Abstract**

*Background:* General practitioners (GPs) play a key role in early melanoma detection. In order to help GPs deal with suspicious skin lesions, melanoma diagnostic training programs have been developed. However, it is unclear whether these programs guarantee the acquisition of skills that will be applied by GPs in their daily clinical practice and maintained over time.

*Objectives:* This scoping review aimed to examine and compare educational programs designed to train GPs in melanoma diagnosis using clinical (naked eye) examination alone or dermoscopy +/- clinical examination, and sought to inform on the long-term sustainability of the GPs' acquired skills.

*Eligibility criteria:* Studies eligible for inclusion evaluated educational programs for teaching diagnosis of melanoma to GPs. MEDLINE, EMBASE, and Cochrane databases were searched for relevant articles from 1995 to May 2020.

*Results:* Forty-five relevant articles were found assessing 31 educational programs. Most programs that improved the diagnostic accuracy and long-term performances of the GPs i.e., increase in confidence, decrease in dermatologist referral of benign skin lesions, and improvement of the benign/malignant ratio of excised skin lesions, trained the GPs in clinical diagnosis followed by dermoscopy. To maintain long-term performances, these programs provided refresher training material.

*Conclusion:* This review shows that studies generally report positive outcomes from the training of GPs in melanoma diagnosis. However, refresher training material seemed necessary to maintain the acquired skills. The optimal form and ideal frequency for these updates have yet to be defined.



## **Strengths and limitations of the review**

- Systematic review conducted following the guidelines of the PRISMA-ScR (Preferred Reporting Items for Systematic reviews and Meta-Analyses extension for Scoping Reviews) checklist.
- It thoroughly evaluates educational programs on melanoma diagnosis for general practitioners.
- Specifically, the review examines the long-term effect of the educational programs and the value of providing regular refresher training sessions after the training.
- This review led inevitably to some publication bias as only English language peer-reviewed articles were included.

## **Acknowledgements**

The authors would like to thank Graziella Messina, Research Assistant at the Health Sciences Library of the Catholic University of Louvain, UCLouvain in Brussels, for her help in developing the research strategy for this review.

## **Contributorship statement**

E. Harkemanne developed the research protocol, completed the literature search and screened the articles for inclusion, extracted the data, synthesised the findings, interpreted the results and drafted the manuscript. M. Baeck screened the articles for inclusion, extracted data and critically revised the manuscript. I. Tromme developed the protocol, independently reviewed the articles for inclusion, extracted data, interpreted the results and critically revised the manuscript. All authors approved the final version.

## **Data availability statement**

All data relevant to the study are included in the article.

## **Introduction**

Early melanoma detection is essential to reduce morbidity and mortality of melanoma patients.<sup>1</sup> Given the increased incidence of this aggressive skin cancer, primary care physicians (PCPs) play a key role in early melanoma diagnosis.<sup>2-4</sup> PCPs include a number of health care professionals who provide first and continuing medical care to a patient. In this review, we focus on GPs who take care of patients in community settings and are, in most countries, the first point of contact for any patient with a health issue.

To improve the diagnostic accuracy of melanoma by GPs, specific educational training programs have been developed. At first, training courses focused on melanoma diagnosis by clinical (naked eye) examination alone. A systematic review<sup>5</sup>, published in 2011, reported on 20 studies that evaluated 13 educational interventions in clinical melanoma diagnosis for PCPs. All the evaluated interventions improved diagnostic accuracy and melanoma management. Later, educational programs that included dermoscopy training were created and were then evaluated for primary care. To date, dermoscopy has been the most widely non-invasive *in vivo* technique used in clinical practice to assess skin tumors.<sup>6</sup> It involves the use of a handheld device which allows the observation of skin structures invisible to the naked eye. However, the sensitivity and specificity of the technique are operator-dependent (trained vs. untrained physicians).<sup>7</sup> Ninety-two percent sensitivity and 95% specificity can be achieved for melanoma diagnosis by a trained dermatologist combining visual inspection and *in vivo* dermoscopy.<sup>8</sup> In primary care, dermoscopy has also been shown to be an effective tool for the triage of suspicious pigmented skin lesions when performed by properly trained PCPs.<sup>9,10</sup> Yet, the minimum training required to reach competence is still unknown.<sup>11</sup>

Previously published reviews<sup>5,11-14</sup> on training programs in melanoma diagnosis for GPs focused on the content, teaching method, outcome measures and study-by-study efficacy of the evaluated educational interventions. However, they did not assess whether the GPs' acquired skills were measured in the short or long term. Yet, given the increasing burden of melanoma on general practice, it is crucial to know whether these programs are capable of teaching GPs easily applicable and sustainable skills in melanoma diagnosis and management. This scoping review aimed to explore educational programs training GPs in melanoma diagnosis using clinical (naked eye) examination alone and diagnosis using dermoscopy +/- clinical examination. Educational programs were examined with regard to training content, teaching

1  
2  
3 method, training duration, availability of refresher training material, and outcome measures.  
4 This review also specifically sought to inform on the long-term sustainability of the skills  
5 acquired during these training programs.  
6  
7  
8

## 9 **Material and methods**

10  
11 To carry out this literature review, a scoping review seemed the most appropriate research  
12 method. Indeed, the studies we identified, which provided evidence on the efficacy of  
13 educational programs in melanoma diagnosis for GPs, showed a wide range of study designs  
14 and heterogeneous outcome measures. This observation made it impossible to formally assess  
15 the quality of these studies and to perform a meta-analysis leading to a narrative synthesis of  
16 our research results. To conduct this scoping review, the framework developed by Arksey and  
17 O'Malley,<sup>15</sup> subsequently refined by Levac,<sup>16</sup> and the guidelines of the PRISMA-ScR<sup>17</sup>  
18 (Preferred Reporting Items for Systematic reviews and Meta-Analyses extension for Scoping  
19 Reviews) checklist were followed.  
20  
21  
22  
23  
24  
25  
26  
27  
28

### 29 **Eligibility criteria**

30 Studies eligible for inclusion in this review (Table 1) evaluated educational programs teaching  
31 either clinical diagnosis of melanoma and/or diagnosis using dermoscopy +/- clinical  
32 examination and designed primarily for PCPs including GPs. The population of interest  
33 included qualified GPs and GP trainees. Specialists and GPs working in hospital settings and/or  
34 specialized clinics were excluded. Studies that included training programs for PCPs other than  
35 GPs were not eligible. Studies where no participant training in melanoma diagnosis was  
36 proposed and studies evaluating exclusively non-melanoma skin cancer detection were also  
37 excluded. Studies evaluating teledermoscopy and computer-aided diagnosis of melanoma were  
38 not assessed as they do not require specific education in melanoma recognition by the  
39 participants. Only studies assessing the type of educational program and its short and/or the  
40 long-term efficacy on the skills acquired by the GPs were included. Finally, only peer-reviewed  
41 and English language articles were included.  
42  
43  
44  
45  
46  
47  
48  
49  
50  
51

### 52 **Data sources and study selection**

53 MEDLINE, EMBASE, and Cochrane databases were searched for relevant articles published  
54 from 1995 to May 2020. Studies were selected for inclusion independently by three authors  
55 (EH, MB, and IT), with IT providing the final decision in the event of disagreement. The studies  
56  
57  
58  
59  
60

1  
2  
3 were not assessed for bias, as the risk of bias assessment was reported as not applicable to  
4 scoping reviews in the 2018 PRISMA-ScR guidelines.<sup>17</sup>  
5  
6  
7

8 To extensively cover the literature on the subject, four categories of terms were identified: (1)  
9 general practitioners, family doctor, general medicine, family practice, primary care physicians;  
10 (2) education, continuing medical education; (3) melanoma, malignant melanoma, cutaneous  
11 melanoma, skin neoplasms; (4) diagnosis, and cancer early detection. In MEDLINE, the  
12 following Medical Subject Headings (MeSH) were used: *general practitioners OR family*  
13 *practice OR primary care physicians OR general practice AND melanoma AND diagnosis*.  
14 No limits were defined. In EMBASE, Emtree terms were exploded: *general practitioner, family*  
15 *doctor, primary care, family physician, primary care physician, melanoma, diagnosis, and*  
16 *education*. In the Cochrane database, the following terms were searched: *melanoma AND*  
17 *diagnosis AND general practitioners OR family medicine AND dermoscopy* (see  
18 Supplementary Table 1 for search strategies). In addition, the reference lists of included studies  
19 were screened as a source of further relevant articles.  
20  
21  
22  
23  
24  
25  
26  
27  
28  
29

### 30 **Data extraction**

31 Two authors (EH and MB) reviewed all included articles and independently collected data.  
32 Extracted data included authors, year of publication, origin of the article, study design, number  
33 of participating GPs, type of educational program, type of outcome measures and short- and/or  
34 long-term evaluation of these outcomes. The type of educational program included training  
35 content, teaching method, training duration and refresher training material (if provided). To  
36 facilitate comparison with data found in previous reviews, all these data were reported into  
37 categories adapted from those presented by Fee *et al.*<sup>14</sup>  
38  
39  
40  
41  
42  
43  
44  
45

46 Table 2 gives the definition of the different categories. The training content was subdivided into  
47 six components: epidemiology, clinical diagnosis, clinical algorithm, dermoscopic diagnosis,  
48 dermoscopic algorithm and management. The teaching method was considered either as live,  
49 in the form of scientific literature, e-learning, or self-assessment. The refresher training material  
50 specified the material available for participants to refresh their skills after the training. The  
51 outcome measures were expressed either in terms of competence or in terms of performance,  
52 according to the assessment approach of continuing medical education programs proposed by  
53 Moore.<sup>18</sup> Finally, since the limits between short-term and long-term evaluation of a medical  
54  
55  
56  
57  
58  
59  
60

educational program are not standardized, arbitrary limits have been chosen based on the observations made during this literature review.

### **Patient and Public Involvement**

No patient and public involvement was required for this review.

## **Results**

In total, 325 articles were identified from the electronic database searches, as shown in the PRISMA flowchart (Figure 1).<sup>19</sup> At the end of the study selection process, 45 relevant articles, which assessed 31 educational interventions, were included in the review analysis.

### **Study designs**

Thirty-six interventional studies with a range of study designs were found: 11 randomized controlled trials (RCTs)<sup>9,10,20–25,26–29</sup>, 19 diagnostic accuracy studies<sup>30–35,36–40,41–48</sup>, three cohort studies<sup>49–51</sup> and three case-control studies.<sup>52–54</sup> Five of the 31 training programs were assessed twice.<sup>25,26,28,32,49</sup>

Four systematic reviews were identified: one on the training of PCPs in clinical melanoma diagnosis,<sup>5</sup> two on the training of PCPs in dermoscopy for melanoma diagnosis,<sup>12,13</sup> and one on the use of dermoscopy in primary care.<sup>11</sup> A scoping review on the training of PCPs in dermoscopy<sup>14</sup> was also included. The final three articles were descriptive articles of the educational programs and study protocols.<sup>55–57</sup>

### **Educational programs**

The educational programs in melanoma diagnosis for GPs varied in terms of content, teaching method and outcome measures. The characteristics of these training programs are summarized in Table 3.

#### *Training content*

Of the 31 educational programs, 15 involved the training of GPs in clinical diagnosis, five involved dermoscopic diagnosis alone, and 11 involved the training of GPs in both of these melanoma diagnostic methods. Twelve (80%) of the clinical diagnostic training programs also involved learning of epidemiology and 11 (73%) learning of management guidelines for

suspicious lesions. Only seven (47%) programs teaching clinical diagnosis used an algorithm to teach melanoma recognition, with the ABCD(E) rule<sup>58</sup> (Asymmetry, uneven Borders, uneven Colors, Diameter > 6mm, and Evolution) being most commonly taught. Of the dermoscopic training programs, 12 (80%) included learning of at least one dermoscopic algorithm (Menzies' method,<sup>24,35,37,40</sup> Three-point checklist,<sup>9,40,41</sup> the 7-point checklist,<sup>10,35</sup> TADA,<sup>44,47</sup> the ABCD rule,<sup>35,38</sup> BLINCK,<sup>40</sup> and pattern analysis<sup>35,54</sup>). The Menzies' method,<sup>59</sup> the ABCD rule,<sup>60</sup> pattern analysis and the 7-point checklist<sup>61</sup> were designed originally for trained physicians, and were later tested as effective when used by non-experts.<sup>62</sup> Other algorithms, such as the Three-point checklist<sup>63</sup> and the Triage Amalgamated Dermoscopic Algorithm (TADA)<sup>44</sup> were initially created for use by PCPs. In addition, two educational programs included training on other diagnostic tools, such as sequential digital dermoscopy imaging<sup>37</sup> and polaroid instant camera photography.<sup>26</sup>

#### *Teaching method, training duration and refresher training material*

Live training courses and the use of educational books, posters or videos (literature) were the two preferred teaching methods of clinical diagnostic training programs. Five training programs also used an e-learning approach.<sup>25,28,30,51,53</sup> The most common teaching method used in dermoscopic training programs was live training. This approach was combined with literature and/or e-learning in six programs. Three programs also used self-assessment. Overall, the teaching method did not appear to have influenced the program outcomes. Duration of training varied from 75 minutes to 1 day, was not specified in two studies<sup>31,40</sup>, and was participant dependent in six studies using self-assessment methods. Six dermoscopic diagnostic training programs<sup>29,37,38,41,49,54</sup> and three programs in clinical diagnosis<sup>27,36,50</sup> provided regular refresher training material such as unlimited e-learning access or self-assessment training sessions.

#### *Training outcomes*

Table 4 summarizes the outcome measures of the studies. In the selected studies, the GPs' competences were generally measured in the short term and their performances measured in the long term after the training.

Eight clinical diagnostic training programs and seven dermoscopic training programs only assessed the short-term efficacy of their program (Table 4A). For these studies, the competences most often evaluated were diagnostic accuracy and appropriate management measured in a training setting. The most evaluated short-term performance, measured in a clinical setting, was

1  
2  
3 the GPs' confidence in diagnosing melanoma. With the exception of two studies, all showed a  
4 positive impact of their intervention.<sup>21,23</sup> Four clinical diagnostic training programs and three  
5 dermoscopic training programs (one teaching dermoscopy alone<sup>54</sup>) only assessed long-term  
6 performances (Table 4B). The most evaluated long-term performances, measured in daily  
7 clinical practice, were the GPs' diagnostic accuracy and the benign/malignant ratio of excised  
8 lesions. Three studies<sup>9,36,49</sup> reported improvement of the GPs' performances in melanoma  
9 diagnosis. The other studies reported no improvement.

10  
11  
12 Finally, three clinical diagnostic and seven dermoscopic training programs assessed the short-  
13 and long-term outcome of their training (Table 4C). Except for one,<sup>23</sup> all these training  
14 programs demonstrated improvement of the GPs' competences, measured in a training setting  
15 in the short term. In the long term, eight training programs<sup>10,37,38,41,49,50,53,54</sup> reported significant  
16 improvement of the GPs' performances for the diagnosis of melanoma and benign skin lesions.  
17 This led to either a decrease in the referral rates to dermatologists<sup>37,41,53</sup> and/or a decrease in the  
18 ratio of benign/malignant excised skin lesions.<sup>37,49</sup> Among the major studies, Koelink *et al.*<sup>10</sup>  
19 found that their dermoscopic training program improved the GPs' long-term performances with  
20 up to 1.25 times greater diagnostic accuracy for skin lesions including melanomas. In a French  
21 department, Grange *et al.*<sup>50</sup> observed an impressive reduction of the incidence of advanced  
22 melanomas (Breslow thickness  $\geq 3$  mm) during the 3-year period after their GP training  
23 campaign in clinical melanoma diagnosis. A very recent study by Marra *et al.*,<sup>53</sup> assessing 1662  
24 referrals, reported better quality of referrals by GPs trained in melanoma diagnosis than by  
25 untrained GPs, potentially leading to less unnecessary referrals. However, two educational  
26 programs<sup>28,29</sup> were unable to maintain the GPs' acquired performances in the long term.

## 27 28 29 **Discussion**

30  
31  
32 This scoping review aimed to explore educational programs training GPs in melanoma  
33 diagnosis using clinical (naked eye) examination alone and diagnosis using dermoscopy +/-  
34 clinical examination. Educational programs were examined with regard to training content,  
35 teaching method, training duration, availability of refresher training material, and outcome  
36 measures. This review also specifically sought to inform on the long-term sustainability of the  
37 skills acquired during these training programs.

### **Types of educational programs with positive long-term outcomes**

Most reported educational programs that improved long-term diagnostic accuracy and changed GPs' melanoma practice patterns trained their participating GPs in dermoscopy combined with clinical diagnosis. This teaching method is supported by a recent Cochrane review<sup>8</sup> in which dermoscopy alone was found to be less accurate than clinical examination followed by dermoscopy for the diagnosis of melanoma. The Cochrane review results also suggested that dermoscopic algorithms were the most useful method to train non-experts in dermoscopy. In our review, we found that five of the programs with long-term positive impact used dermoscopic algorithms to teach melanoma diagnosis.<sup>10,37,38,41,54</sup>

Unfortunately, the substantial number of training hours necessary to become competent in dermoscopy is the main reported factor limiting its use in general practice.<sup>64,65</sup> At this time, there is no evidence on the optimal length of training, even though it has been demonstrated that diagnostic accuracy of dermoscopy depends on the degree of training of the practitioner.<sup>66</sup> One study suggested that 1 day of live training in dermoscopy was sufficient to build the confidence of GPs with special interest in melanoma diagnosis.<sup>67</sup> We found two RCTs that demonstrated sustained improvement of GPs' diagnostic accuracy, both of which proposed live training in dermoscopy over 1 day or 10 hours.<sup>9,10</sup> Because the duration of training in dermoscopy is a limiting factor for most GPs, it is important to keep in mind that training in clinical melanoma diagnosis has also been shown to improve the GPs' performances while requiring less training time (in this review, a mean duration of 2.5 hours was observed for clinical diagnostic training programs).<sup>36,50</sup>

However, we found that educational programs teaching dermoscopy have been more likely to assure positive long-term outcomes than programs teaching clinical examination alone. One of the reasons could be that the latter used measures of performance such as GPs' confidence level and number of total-body skin examinations performed before and after training, which did not reflect GPs' diagnostic ability in clinical practice. On the one hand, measuring the confidence of GPs in their own ability to diagnose melanoma is more useful in assessing the quality of a training program than evaluating skills acquired by participants. From a pedagogical point of view, participants feel more confident when they know how to use the teaching content in daily practice but this does not define their true diagnostic competence.<sup>18</sup> On the other hand, the number of total-body skin examinations performed may be useful in measuring GPs' awareness of skin tumours, but not for evaluation of GPs' diagnostic skills.



### Long-term improvement of the GPs' performances in clinical settings

The GPs' long-term performances measured in clinical settings were assessed for 15 educational programs: six in clinical diagnosis and nine in dermoscopic diagnosis. Ten showed a positive impact on the GPs' performances measured over periods ranging from 6 to 19 months. The most frequent observations were a decrease of referral rates to dermatologists for benign skin lesions and an improvement of the benign/malignant ratio of excised skin lesions. The INFORMED group<sup>41</sup> reported an increase in melanoma diagnosis during a screening campaign by GPs trained with their program in 2016.<sup>68</sup> Furthermore, a decrease of the incidence of advanced melanomas was shown in a French department over a 3-year period after their training program in clinical melanoma diagnosis.<sup>50</sup> Unfortunately, two educational programs<sup>28,29</sup> failed to maintain the GPs' acquired performances at 1 year after the end of the training. The reasons might be that Markova *et al.*<sup>28</sup> chose to assess the number of total-body skin examinations performed but did not evaluate the GPs' diagnostic accuracy and that Badertscher *et al.*<sup>29</sup> trained their GPs to use Lumio®, a polarized magnifying glass with 2x magnification instead of a standard dermoscopy device (10x magnification).

To retain acquired diagnostic skills over the long term, results of a recent RCT suggested the need for “refresher sessions at regular intervals”.<sup>69,70</sup> In our review, nine (60%) educational programs evaluated in the long-term provided refresher training material. Seven of these programs were successful. In 2014, Grange *et al.*<sup>50</sup> produced a CD-ROM containing their teaching material and sent regular information about melanoma to the GPs. The INFORMED group<sup>41</sup> provided GPs with a free unlimited access to their web-based course. Menzies *et al.*<sup>37</sup> gave participating GPs an educational textbook and an unlimited e-learning access. Grimaldi *et al.*<sup>38</sup> and Youl *et al.*<sup>49</sup> also ensured self-assessment refresher training sessions. Marra *et al.*<sup>53</sup> found a 10-month sustainability of the diagnostic accuracy of their trained GPs and assumed that daily use of the obtained knowledge during the study period achieved this effect. Only Koelink *et al.*,<sup>10</sup> who evaluated the longest post-training period (19 months) and who demonstrated sustainability of diagnostic skills, did not specify whether update training modalities were provided.

However, the ideal frequency and form of updates have never been studied. An RCT, taking place in the English National Defibrillator Programme, determined that update session intervals after a medical education session should not exceed 7 months to limit the loss of acquired skills and maintain the participants confidence.<sup>71</sup> In the UK, a survey among GPs with special interest

1  
2  
3 in dermatology stated that self-assessment learning was the most popular for refresher  
4 sessions.<sup>67</sup> Nevertheless, they also showed that 36% of GPs that use dermoscopy in their clinical  
5 practice reported to have never updated their training skills. We found that the most appreciated  
6 form of self-assessment updates was the unlimited access to an e-learning course. In the future,  
7 this enthusiasm for online training could lead to the development of smartphone applications to  
8 train GPs in melanoma diagnosis. Some newly developed applications have currently been  
9 evaluated among medical students<sup>72</sup> and dermatology residents.<sup>73</sup> Initial results already looked  
10 very promising.  
11  
12

13  
14  
15  
16  
17  
18 Finally, the variability of refresher training material provided in the educational programs and  
19 the heterogeneity of outcome measures did not allow more robust conclusions to be drawn on  
20 the most beneficial training modality for sustainable improvements in GPs' diagnostic skills.  
21  
22

### 23 **Limitations**

24  
25  
26  
27 This scoping review has some limitations and led inevitably to certain publication biases. We  
28 used keywords for the selection of articles and only peer-reviewed articles were included. By  
29 limiting our research to English language articles, some studies may also have been missed. It  
30 is also very likely that melanoma diagnostic training programs exist in unpublished forms, for  
31 example in university continuing medical education programs. Moreover, we focused only on  
32 studies assessing melanoma diagnostic training methods among GPs. Therefore, we may have  
33 failed to mention some educational programs for primary care in this review. Furthermore,  
34 educational programs which were not evaluated in studies were overlooked. Finally, this review  
35 covers educational programs over a 25-year period. As technology has evolved considerably  
36 over this time, some teaching methods and refresher training materials have been overshadowed  
37 by interactive online tutorials (e-learning) - all the more so with the health crisis caused by  
38 COVID-19 during which distance learning methods have developed very rapidly.  
39  
40  
41  
42  
43  
44  
45  
46  
47  
48  
49

### 50 **Conclusion**

51  
52 In conclusion, educational programs trained GPs in melanoma diagnosis using clinical  
53 examination alone or dermoscopy +/- clinical diagnosis. Most reported programs that improved  
54 the long-term diagnostic accuracy and changed routine performances of the GPs (i.e., decrease  
55 in dermatologist referral of benign skin lesions, and improvement of the benign/malignant ratio  
56 of excised skin lesions), trained their participating GPs in both diagnostic methods. The  
57  
58  
59  
60

1  
2  
3 preferred teaching methods were live and e-learning but the teaching method did not seem to  
4 influence the GPs' acquired performances. It is important to note that the educational programs  
5 that achieved long term sustainability of GPs' performances in daily clinical practice provided  
6 refresher training material. However, no conclusions on the most beneficial training modality  
7 to sustainably improve GPs' diagnostic skills could be drawn given the heterogeneity of  
8 outcome measures and study designs. Therefore, the optimal form and ideal frequency of these  
9 updates have yet to be defined.  
10  
11  
12  
13  
14  
15  
16

## 17 References

- 18 1 Petrie T, Samatham R, Witkowski AM, *et al.* Melanoma Early Detection: Big Data,  
19 Bigger Picture. *J. Invest. Dermatol.* 2019. doi:10.1016/j.jid.2018.06.187.
- 20 2 Van Rijnsingen MCJ, Van Bon B, Van Der Wilt GJ, *et al.* The current and future role of  
21 general practitioners in skin cancer care: An assessment of 268 general practitioners.  
22 *Br J Dermatol* 2014. doi:10.1111/bjd.12935.
- 23 3 Buckley D, McMonagle C. Melanoma in primary care. The role of the general  
24 practitioner. *Ir J Med Sci* 2014. doi:10.1007/s11845-013-1021-z.
- 25 4 Grange F, Barbe C, Mas L, *et al.* The role of general practitioners in diagnosis of  
26 cutaneous melanoma: A population-based study in France. *Br. J. Dermatol.* 2012.  
27 doi:10.1111/j.1365-2133.2012.11178.x.
- 28 5 Goulart JM, Quigley EA, Dusza S, *et al.* Skin cancer education for primary care  
29 physicians: A systematic review of published evaluated interventions. *J. Gen. Intern.*  
30 *Med.* 2011. doi:10.1007/s11606-011-1692-y.
- 31 6 Bakos RM, Blumetti TP, Roldán-Marín R, Salerni G. Noninvasive Imaging Tools in  
32 the Diagnosis and Treatment of Skin Cancers. *Am. J. Clin. Dermatol.* 2018.  
33 doi:10.1007/s40257-018-0367-4.
- 34 7 Piccolo D, Ferrari A, Peris K, *et al.* Dermoscopic diagnosis by a trained clinician vs. a  
35 clinician with minimal dermoscopy training vs. computer-aided diagnosis of 341  
36 pigmented skin lesions: A comparative study. *Br J Dermatol* 2002. doi:10.1046/j.1365-  
37 2133.2002.04978.x.
- 38 8 Dinnes J, Deeks JJ, Chuchu N, *et al.* Dermoscopy, with and without visual inspection,  
39 for diagnosing melanoma in adults. *Cochrane Database Syst. Rev.* 2018.  
40 doi:10.1002/14651858.CD011902.pub2.
- 41 9 Argenziano G, Puig S, Zalaudek I, *et al.* Dermoscopy improves accuracy of primary  
42 care physicians to triage lesions suggestive of skin cancer. *J Clin Oncol* 2006.  
43 doi:10.1200/JCO.2005.05.0864.
- 44 10 Koelink CJL, Vermeulen KM, Kollen BJ, *et al.* Diagnostic accuracy and cost-  
45 effectiveness of dermoscopy in primary care: a cluster randomized clinical trial. *J Eur*  
46 *Acad Dermatology Venereol* 2014. doi:10.1111/jdv.12306.
- 47 11 Jones OT, Jurascheck LC, Van Melle MA, *et al.* Dermoscopy for melanoma detection  
48 and triage in primary care: A systematic review. *BMJ Open.* 2019.  
49  
50  
51  
52  
53  
54  
55  
56  
57  
58  
59  
60

- doi:10.1136/bmjopen-2018-027529.
- 12 Herschorn A. Dermoscopy for melanoma detection in family practice. *Can Fam Physician* 2012.
- 13 Chia A, Trevena L. A Systematic Review of Training to Improve Melanoma Diagnostic Skills in General Practitioners. *J. Cancer Educ.* 2016. doi:10.1007/s13187-015-0864-6.
- 14 Fee JA, McGrady FP, Rosendahl C, Hart ND. Training Primary Care Physicians in Dermoscopy for Skin Cancer Detection: a Scoping Review. *J. Cancer Educ.* 2019. doi:10.1007/s13187-019-01647-7.
- 15 Arksey H, O'Malley L. Scoping studies: Towards a methodological framework. *Int J Soc Res Methodol Theory Pract* 2005. doi:10.1080/1364557032000119616.
- 16 Levac D, Colquhoun H, O'Brien KK. Scoping studies: Advancing the methodology. *Implement Sci* 2010. doi:10.1186/1748-5908-5-69.
- 17 Tricco AC, Lillie E, Zarin W, *et al.* PRISMA extension for scoping reviews (PRISMA-ScR): Checklist and explanation. *Ann. Intern. Med.* 2018. doi:10.7326/M18-0850.
- 18 Moore DE. How Physicians Learn and How to Design Learning Experiences for Them: An Approach Based on an Interpretive Review of Evidence. In: *Continuing Education in the Health Professions: Improving Healthcare through Lifelong Learning.* , 2008.
- 19 Moher D, Liberati A, Tetzlaff J AD. PRISMA 2009 Flow Diagram. Prism. statement. 2009. doi:10.1371/journal.pmed1000097.
- 20 Del Mar CB, Green AC. Aid to diagnosis of melanoma in primary medical care. *BMJ* 1995. doi:10.1136/bmj.310.6978.492.
- 21 Dolan NC, Ng JS, Martin GJ, *et al.* Effectiveness of a skin cancer control educational intervention for internal medicine housestaff and attending physicians. *J Gen Intern Med* 1997. doi:10.1046/j.1525-1497.1997.07106.x.
- 22 Gerbert B, Bronstone A, Wolff M, *et al.* Improving primary care residents' proficiency in the diagnosis of skin cancer. *J Gen Intern Med* 1998. doi:10.1046/j.1525-1497.1998.00024.x.
- 23 Raasch BA, Hays R, Buettner PG. An educational intervention to improve diagnosis and management of suspicious skin lesions. *J Contin Educ Health Prof* 2000. doi:10.1002/chp.1340200108.
- 24 Westerhoff K, McCarthy WH, Menzies SW. Increase in the sensitivity for melanoma diagnosis by primary care physicians using skin surface microscopy. *Br J Dermatol* 2000. doi:10.1046/j.1365-2133.2000.03836.x.
- 25 Gerbert B, Bronstone A, Maurer T, *et al.* The effectiveness of an Internet-based tutorial in improving primary care physicians' skin cancer triage skills. *J Cancer Educ* 2002. doi:10.1080/08858190209528784.
- 26 English DR, Burton RC, Del Mar CB, *et al.* Evaluation of aid to diagnosis of pigmented skin lesions in general practice: Controlled trial randomised by practice. *Br Med J* 2003. doi:10.1136/bmj.327.7411.375.
- 27 De Gannes GC, Ip JL, Martinka M, *et al.* Early detection of skin cancer by family physicians: A pilot project. *J. Cutan. Med. Surg.* 2004.

- doi:10.1177/120347540400800205.
- 28 Markova A, Weinstock MA, Risica P, *et al.* Effect of a web-based curriculum on primary care practice: Basic skin cancer triage trial. *Fam Med* 2013.
- 29 Badertscher N, Tandjung R, Senn O, *et al.* A multifaceted intervention: no increase in general practitioners' competence to diagnose skin cancer (minSKIN) - randomized controlled trial. *J Eur Acad Dermatology Venerol* 2015. doi:10.5167/uzh-102419.
- 30 Harris JM, Salasche SJ, Harris RB. Using the Internet to teach melanoma management guidelines to primary care physicians. *J Eval Clin Pract* 1999. doi:10.1046/j.1365-2753.1999.00194.x.
- 31 Bedlow AJ, Cliff S, Melia J, *et al.* Impact of skin cancer education on general practitioners' diagnostic skills. *Clin Exp Dermatol* 2000. doi:10.1046/j.1365-2230.2000.00590.x.
- 32 Harris JM, Salasche SJ, Harris RB. Can internet-based continuing medical education improve physicians' skin cancer knowledge and skills? *J Gen Intern Med* 2001. doi:10.1046/j.1525-1497.2001.00615.x.
- 33 Brochez L, Verhaeghe E, Bleyen L, Naeyaert JM. Diagnostic ability of general practitioners and dermatologists in discriminating pigmented skin lesions. *J Am Acad Dermatol* 2001. doi:10.1067/mjd.2001.113442.
- 34 Carli P, De Giorgi V, Crocetti E, *et al.* Diagnostic and referral accuracy of family doctors in melanoma screening: Effect of a short formal training. *Eur J Cancer Prev* 2005. doi:10.1097/00008469-200502000-00007.
- 35 Dolianitis C, Kelly J, Wolfe R, Simpson P. Comparative performance of 4 dermoscopic algorithms by nonexperts for the diagnosis of melanocytic lesions. *Arch Dermatol* 2005. doi:10.1001/archderm.141.8.1008.
- 36 Peuvrel L, Quereux G, Jumbou O, *et al.* Impact of a campaign to train general practitioners in screening for melanoma. *Eur J Cancer Prev* 2009. doi:10.1097/CEJ.0b013e32831bc3b2.
- 37 Menzies SW, Emery J, Staples M, *et al.* Impact of dermoscopy and short-term sequential digital dermoscopy imaging for the management of pigmented lesions in primary care: A sequential intervention trial. *Br J Dermatol* 2009. doi:10.1111/j.1365-2133.2009.09374.x.
- 38 Grimaldi L, Silvestri A, Brandi C, *et al.* Digital epiluminescence dermoscopy for pigmented cutaneous lesions, primary care physicians, and telediagnosis: a useful tool? *J Plast Reconstr Aesthetic Surg* 2009. doi:10.1016/j.bjps.2008.01.011.
- 39 Shariff Z, Roshan A, Williams AM, Platt AJ. 2-Week wait referrals in suspected skin cancer: Does an instructional module for general practitioners improve diagnostic accuracy? *Surgeon* 2010. doi:10.1016/j.surge.2010.03.004.
- 40 Bourne P, Rosendahl C, Keir J, Cameron A. BLINCK—A diagnostic algorithm for skin cancer diagnosis combining clinical features with dermatoscopy findings. *Dermatol Pract Concept* 2012. doi:10.5826/dpc.0202a12.
- 41 Eide MJ, Asgari MM, Fletcher SW, *et al.* Effects on skills and practice from a web-based skin cancer course for primary care providers. *J Am Board Fam Med* 2013. doi:10.3122/jabfm.2013.06.130108.

- 1  
2  
3 42 Mikkilineni R, Weinstock MA, Goldstein MG, *et al.* Impact of the basic skin cancer  
4 triage curriculum on providers' skin cancer control practices. *J Gen Intern Med* 2001.  
5 doi:10.1046/j.1525-1497.2001.00626.x.  
6
- 7 43 Mikkilineni R, Weinstock MA, Goldstein MG, *et al.* The impact of the basic skin  
8 cancer triage curriculum on providers' skills, confidence, and knowledge in skin cancer  
9 control. *Prev Med (Baltim)* 2002. doi:10.1006/pmed.2001.0961.  
10
- 11 44 Rogers T, Marino ML, Dusza SW, *et al.* A clinical aid for detecting skin cancer: The  
12 triage amalgamated dermoscopic algorithm (TADA). *J Am Board Fam Med* 2016.  
13 doi:10.3122/jabfm.2016.06.160079.  
14
- 15 45 Secker LJ, Buis PAJ, Bergman W, Kukutsch NA. Effect of a dermoscopy training  
16 course on the accuracy of primary care physicians in diagnosing pigmented lesions.  
17 *Acta Derm Venereol* 2017. doi:10.2340/00015555-2526.  
18
- 19 46 Beecher SM, Keogh C, Healy C. Dedicated general practitioner education sessions can  
20 improve diagnostic capabilities and may have a positive effect on referral patterns for  
21 common skin lesions. *Ir J Med Sci* 2018. doi:10.1007/s11845-018-1788-z.  
22
- 23 47 Seiverling E V., Ahrns HT, Greene A, *et al.* Teaching benign skin lesions as a strategy  
24 to improve the triage amalgamated dermoscopic algorithm (TADA). *J Am Board Fam*  
25 *Med* 2019. doi:10.3122/jabfm.2019.01.180049.  
26
- 27 48 Sawyers EA, Wigle DT, Marghoob AA, Blum A. Dermoscopy Training Effect on  
28 Diagnostic Accuracy of Skin Lesions in Canadian Family Medicine Physicians Using  
29 the Triage Amalgamated Dermoscopic Algorithm. *Dermatol Pract Concept* 2020; **10**  
30 **(2)**. doi:10.5826/dpc.1002a35.  
31
- 32 49 Youl PH, Raasch BA, Janda M, Aitken JF. The effect of an educational programme to  
33 improve the skills of general practitioners in diagnosing melanocytic/pigmented  
34 lesions. *Clin Exp Dermatol* 2007. doi:10.1111/j.1365-2230.2007.02414.x.  
35
- 36 50 Grange F, Woronoff AS, Bera R, *et al.* Efficacy of a general practitioner training  
37 campaign for early detection of melanoma in France. *Br J Dermatol* 2014.  
38 doi:10.1111/bjd.12585.  
39
- 40 51 Gulati A, Harwood CA, Rolph J, *et al.* Is an online skin cancer toolkit an effective way  
41 to educate primary care physicians about skin cancer diagnosis and referral? *J Eur*  
42 *Acad Dermatology Venereol* 2015. doi:10.1111/jdv.13167.  
43
- 44 52 Girgis A, Sanson-Fisher RW, Howe C, Raffan B. A skin cancer training programme:  
45 evaluation of a postgraduate training for family doctors. *Med Educ* 1995.  
46 doi:10.1111/j.1365-2923.1995.tb00027.x.  
47
- 48 53 Marra E, van Rijsingen MCJ, Alkemade JAC, *et al.* The effect of a dermato-oncologic  
49 training program on the diagnostic skills and quality of referrals for suspicious skin  
50 lesions by general practitioners. *Br J Dermatol* 2020. doi:10.1111/bjd.19214.  
51
- 52 54 Augustsson A, Paoli J. Effects of a 1-Day Training Course in Dermoscopy Among  
53 General Practitioners. *Dermatol Pract Concept* 2019; **9**:195–9.  
54
- 55 55 Shaikh WR, Geller A, Alexander G, *et al.* Developing an interactive web-based  
56 learning program on skin cancer: The learning experiences of clinical educators. *J*  
57 *Cancer Educ* 2012. doi:10.1007/s13187-012-0378-4.  
58
- 59 56 Badertscher N, Rosemann T, Tandjung R, Braun RP. MinSKIN Does a multifaceted  
60

- 1  
2  
3 intervention improve the competence in the diagnosis of skin cancer by general  
4 practitioners? Study protocol for a randomised controlled trial. *Trials* 2011.  
5 doi:10.1186/1745-6215-12-165.  
6
- 7 57 Weinstock MA, Goldstein MG, Dubé CE, *et al.* Basic skin cancer triage for teaching  
8 melanoma detection. *J Am Acad Dermatol* 1996. doi:10.1016/S0190-9622(96)90287-  
9 X.  
10
- 11 58 Friedman RJ, Rigel DS, Kopf AW. Early Detection of Malignant Melanoma: The Role  
12 of Physician Examination and Self-Examination of the Skin. *CA Cancer J Clin* 1985.  
13 doi:10.3322/canjclin.35.3.130.  
14
- 15 59 Menzies SW. A method for the diagnosis of primary cutaneous melanoma using  
16 surface microscopy. *Dermatol Clin* 2001. doi:10.1016/S0733-8635(05)70267-9.  
17
- 18 60 Stolz W, Riemann A, Cagnetta AB, *et al.* ABCD rule of dermoscopy: A new  
19 practical method for early recognition of malignant melanoma. *Eur J Dermatology*  
20 1994.  
21
- 22 61 Argenziano G, Fabbrocini G, Carli P, *et al.* Epiluminescence Microscopy for the  
23 Diagnosis of Doubtful Melanocytic Skin Lesions. *Arch Dermatol* 1998.  
24 doi:10.1001/archderm.134.12.1563.  
25
- 26 62 Pagnanelli G, Soyer HP, Argenziano G, *et al.* Diagnosis of pigmented skin lesions by  
27 dermoscopy: Web-based training improves diagnostic performance of non-experts. *Br*  
28 *J Dermatol* 2003. doi:10.1046/j.1365-2133.2003.05168.x.  
29
- 30 63 Soyer HP, Argenziano G, Zalaudek I, *et al.* Three-point checklist of dermoscopy: A  
31 new screening method for early detection of melanoma. *Dermatology* 2004.  
32 doi:10.1159/000075042.  
33
- 34 64 Chappuis P, Duru G, Marchal O, *et al.* Dermoscopy, a useful tool for general  
35 practitioners in melanoma screening: a nationwide survey. *Br J Dermatol* 2016.  
36 doi:10.1111/bjd.14495.  
37
- 38 65 Oliveria SA, Heneghan MK, Cushman LF, *et al.* Skin cancer screening by  
39 dermatologists, family practitioners, and internists: Barriers and facilitating factors.  
40 *Arch Dermatol* 2011. doi:10.1001/archdermatol.2010.414.  
41
- 42 66 Kittler H, Pehamberger H, Wolff K, Binder M. Diagnostic accuracy of dermoscopy.  
43 *Lancet Oncol.* 2002. doi:10.1016/S1470-2045(02)00679-4.  
44
- 45 67 Jones OT, Jurascheck LC, Utukuri M, *et al.* Dermoscopy use in UK primary care: a  
46 survey of GPs with a special interest in dermatology. *J Eur Acad Dermatology*  
47 *Venereol* 2019. doi:10.1111/jdv.15614.  
48
- 49 68 Weinstock MA, Ferris LK, Saul MI, *et al.* Downstream consequences of melanoma  
50 screening in a community practice setting: First results. *Cancer* 2016.  
51 doi:10.1002/ncr.30177.  
52
- 53 69 Robinson JK, Jain N, Marghoob AA, *et al.* A Randomized Trial on the Efficacy of  
54 Mastery Learning for Primary Care Provider Melanoma Opportunistic Screening Skills  
55 and Practice. *J Gen Intern Med* 2018. doi:10.1007/s11606-018-4311-3.  
56
- 57 70 Robinson JK, MacLean M, Reavy R, *et al.* Dermoscopy of Concerning Pigmented  
58 Lesions and Primary Care Providers' Referrals at Intervals After Randomized Trial of  
59 Mastery Learning. *J Gen Intern Med* 2018. doi:10.1007/s11606-018-4419-5.  
60

- 1  
2  
3 71 Woollard M, Whitfield R, Newcombe RG, *et al.* Optimal refresher training intervals  
4 for AED and CPR skills: A randomised controlled trial. *Resuscitation* 2006.  
5 doi:10.1016/j.resuscitation.2006.04.005.  
6  
7 72 Lacy FA, Coman GC, Holliday AC, Kolodney MS. Assessment of smartphone  
8 application for teaching intuitive visual diagnosis of melanoma. *JAMA Dermatology*.  
9 2018. doi:10.1001/jamadermatol.2018.1525.  
10  
11 73 Nelson KC, Gershenwald JE, Savory SA, *et al.* Telementoring and smartphone-based  
12 answering systems to optimize dermatology resident dermoscopy education. *J Am*  
13 *Acad Dermatol* 2019. doi:10.1016/j.jaad.2019.01.045.  
14  
15  
16  
17  
18  
19  
20  
21  
22  
23  
24  
25  
26  
27  
28  
29  
30  
31  
32  
33  
34  
35  
36  
37  
38  
39  
40  
41  
42  
43  
44  
45  
46  
47  
48  
49  
50  
51  
52  
53  
54  
55  
56  
57  
58  
59  
60

For peer review only



**Table 1. Inclusion and exclusion criteria for article selection**

|                                                                                                                                                                                                                                                                                                                                                                                                                                                                                                                                                                                                                                                                                                                                                                        |
|------------------------------------------------------------------------------------------------------------------------------------------------------------------------------------------------------------------------------------------------------------------------------------------------------------------------------------------------------------------------------------------------------------------------------------------------------------------------------------------------------------------------------------------------------------------------------------------------------------------------------------------------------------------------------------------------------------------------------------------------------------------------|
| <p><b>Inclusion criteria:</b></p> <p><b>Articles</b></p> <ul style="list-style-type: none"> <li>Articles written in English</li> <li>Study articles and descriptive articles of educational programs</li> </ul> <p><b>Population</b></p> <ul style="list-style-type: none"> <li>Qualified GPs and GP trainees working in community settings</li> </ul> <p><b>Intervention</b></p> <ul style="list-style-type: none"> <li>Studies evaluating educational programs in clinical (naked eye) diagnosis and/or diagnosis of melanoma using dermoscopy</li> </ul> <p><b>Outcome(s)</b></p> <ul style="list-style-type: none"> <li>Studies assessing the type of educational program and its short and/or the long-term efficacy on the skills acquired by the GPs</li> </ul> |
| <p><b>Exclusion criteria:</b></p> <p><b>Articles</b></p> <ul style="list-style-type: none"> <li>Articles not subject to peer review and written in languages other than English</li> </ul> <p><b>Population</b></p> <ul style="list-style-type: none"> <li>Studies involving specialists, medical students, non-GPs, GPs working in hospital settings and/or specialized skin cancer clinics</li> </ul> <p><b>Intervention</b></p> <ul style="list-style-type: none"> <li>Studies evaluating exclusively nonmelanoma skin cancer</li> <li>Teledermoscopy studies</li> <li>Studies on computer-aided diagnosis of melanoma</li> </ul> <p><b>Outcome(s)</b></p> <ul style="list-style-type: none"> <li>No method of measuring outcomes was ruled out</li> </ul>          |

*Key: GPs= general practitioners*

**Table 2. Definition of study categories**

| <b>Criteria</b>                    | <b>Categories</b>        | <b>Definition</b>                                                                                                                                                                                                                                                                                           |
|------------------------------------|--------------------------|-------------------------------------------------------------------------------------------------------------------------------------------------------------------------------------------------------------------------------------------------------------------------------------------------------------|
| <b>Training content</b>            | Epidemiology             | Background information on rates of melanoma cancer, risk factors, localization and evolution of melanomas                                                                                                                                                                                                   |
|                                    | Clinical diagnosis       | Naked eye melanoma recognition                                                                                                                                                                                                                                                                              |
|                                    | Clinical algorithm       | Use of a pre-existing algorithm as a learning tool to aid for clinical diagnosis                                                                                                                                                                                                                            |
|                                    | Dermoscopic diagnosis    | Recognition of melanoma using dermoscopy                                                                                                                                                                                                                                                                    |
|                                    | Dermoscopic algorithm    | Use of an algorithm as a learning tool to aid for dermoscopic diagnosis                                                                                                                                                                                                                                     |
|                                    | Management               | Determination of a plan of action for a skin lesion i.e. reassurance, follow-up, or lesion excision                                                                                                                                                                                                         |
| <b>Teaching method</b>             | Live                     | Presentation by a speaker to a group of participants                                                                                                                                                                                                                                                        |
|                                    | Scientific literature    | Use of educational books, posters, letters, CD-ROMs or videos                                                                                                                                                                                                                                               |
|                                    | E-learning               | Interactive online tutorials including audio and visual information                                                                                                                                                                                                                                         |
|                                    | Self-assessment          | Learning by the participant himself using educational material                                                                                                                                                                                                                                              |
| <b>Refresher training material</b> | Teledermatology feedback | Feedback from a dermatologist on the image and clinical history of a suspicious lesion at a distance, using remote internet-based technologies                                                                                                                                                              |
| <b>Outcome measures</b>            | Competences              | Acquired skills, which are evaluated in a training setting on clinical and/or dermoscopic photographs of skin lesions                                                                                                                                                                                       |
|                                    | Diagnostic accuracy      | Ability of the participants to discriminate between melanoma and benign lesions                                                                                                                                                                                                                             |
|                                    | Knowledge                | Report of conceptual understanding                                                                                                                                                                                                                                                                          |
|                                    | Appropriate management   | Determination of the right plan of action for a skin lesion                                                                                                                                                                                                                                                 |
|                                    | Performances             | Changes in real-life practice measured in a clinical setting, i.e. changes in the benign/malignant ratio of excised lesions, the number of total-body skin examinations performed, confidence of the GPs, changes in referral rates to a dermatologist, and decrease in the incidence of advanced melanomas |
| <b>Evaluation</b>                  | Short-term               | Measurement of outcomes immediately or up to 3 months after the training                                                                                                                                                                                                                                    |
|                                    | Long-term                | Measurement of outcomes at $\geq$ 6 months after the training                                                                                                                                                                                                                                               |

**Table 3. Characteristics of educational programs in melanoma diagnosis for general practitioners**

| Article                                                  | Study design       | Study participants       | Training content |                    |                    |                       |                       |            | Teaching method                 | Training duration                    | Refresher training material |
|----------------------------------------------------------|--------------------|--------------------------|------------------|--------------------|--------------------|-----------------------|-----------------------|------------|---------------------------------|--------------------------------------|-----------------------------|
|                                                          |                    |                          | Epidemiology     | Clinical diagnosis | Clinical algorithm | Dermoscopic diagnosis | Dermoscopic algorithm | Management |                                 |                                      |                             |
| author, year, location <sup>ref</sup>                    |                    |                          |                  |                    |                    |                       |                       |            |                                 |                                      |                             |
| Marra, 2020, The Netherlands <sup>53</sup>               | Case-control study | 185 (83; 102)*           |                  | X                  |                    | X (optional)          |                       | X          | e-learning                      | 2h                                   |                             |
| Sawyers, 2020, Canada <sup>48</sup>                      | DA study           | 33 GPs                   |                  |                    |                    | X                     | TADA step-I           |            | Live                            | 3.5h                                 |                             |
| Augustsson, 2019, Sweden <sup>54</sup>                   | Case-control study | 43 GPs (27;16)*          |                  |                    |                    | X                     | Pattern analysis      |            | Live                            | 1-day                                | PDF-files of the course     |
| Seiverling, 2019, USA <sup>47</sup>                      | DA study           | 59 GPs                   |                  | X                  |                    | X                     | TADA                  |            | Live                            | 75min                                |                             |
| Beecher, 2018, Ireland <sup>46</sup>                     | DA study           | 23 GP trainees           | X                | X                  |                    |                       |                       | X          | Live, Literature                | 1h                                   |                             |
| Secker, 2017, The Netherlands <sup>45</sup>              | DA study           | 293 PCPs including ? GPs |                  | X                  |                    | X                     |                       | X          | Live, Literature and E-learning | 1-day                                |                             |
| Rogers, 2016, USA <sup>44</sup>                          | DA study           | 16 GPs                   |                  |                    |                    | X                     | TADA                  |            | Live                            | 1-day                                |                             |
| Badertscher, 2011 and 2015, Switzerland <sup>56,29</sup> | RCT                | 78 GPs (39;39)*          |                  | X                  |                    | Lumio®                |                       |            | Live                            | 1-day                                | Teledermatology feedback    |
| Gulati, 2015, UK <sup>51</sup>                           | Cohort study       | 967 GPs                  | X                | X                  |                    |                       |                       | X          | E-learning                      | PD                                   |                             |
| Koelink, 2014, The Netherlands <sup>10</sup>             | RCT                | 53 GPs                   | X                | X                  |                    | X                     | 7-point checklist     |            | Live                            | 4h clinical diagnosis; 6h dermoscopy |                             |

|                                                                                                                        |                 |                               |   |   |                              |                                     |                                             |   |                                   |                       |                                               |
|------------------------------------------------------------------------------------------------------------------------|-----------------|-------------------------------|---|---|------------------------------|-------------------------------------|---------------------------------------------|---|-----------------------------------|-----------------------|-----------------------------------------------|
| Grange, 2013, France <sup>50</sup>                                                                                     | Cohort study    | 398 GPs                       | X | X |                              |                                     |                                             |   | Live, Literature                  | 2.5h                  | CD-ROM+ regular information sheets            |
| Markova, 2013, USA <sup>28</sup><br>Mikkilineni, 2001 and 2002, USA <sup>42,43</sup><br>(Weinstock 1996) <sup>57</sup> | RCT<br>DA study | 46 GPs (20;26)*<br>7 GPs      | X | X | ABCD(E)                      |                                     |                                             | X | E-learning<br>Live Literature     | 2h                    |                                               |
| Eide, 2013, <sup>41</sup> (Shaikh, 2012) <sup>55</sup> INFORMED                                                        | DA study        | 54 PCPs including 9 GPs (20%) | X | X | ABCD(E) + Ugly duckling sign | X                                   | Three-point checklist                       | X | E-learning, Self-assessment       | 2h web-based learning | Unlimited e-learning access                   |
| Bourne, 2012, Australia <sup>40</sup>                                                                                  | DA study        | 3 GPs                         |   | X |                              | X                                   | BLINCK Three-point checklist Menzies method |   | Live, Literature                  | UD                    |                                               |
| Shariff, 2010, UK <sup>39</sup>                                                                                        | DA study        | 94 GPs                        |   | X |                              |                                     |                                             |   | Literature                        | PD                    |                                               |
| Grimaldi, 2009, Italy <sup>38</sup>                                                                                    | DA study        | 13 GPs                        |   | X |                              | X                                   | ABCD rule                                   |   | Live, E-learning, Self-assessment | PD                    | Self-assessment e-learning training sessions  |
| Menzies, 2009, Australia <sup>37</sup>                                                                                 | DA study        | 63 GPs                        |   | X |                              | Yes + Sequential digital dermoscopy | Menzies method                              |   | Live, Literature, E-learning      | 2h-workshop           | Unlimited e-learning access                   |
| Peuvrel, 2009, France <sup>36</sup>                                                                                    | DA study        | 210 GPs                       | X | X | ABCD(E)                      |                                     |                                             | X | Live, Literature (CD-ROM)         | 2h                    | CD-ROM                                        |
| Youl, 2007, Australia <sup>49</sup>                                                                                    | Cohort study    | 16 GPs                        | X | X | ABCD(E)                      | X                                   |                                             | X | Literature                        | PD                    | Self-assessment paper-based training sessions |

|                                                |          |                    |   |                             |                                   |   |   |                                                                      |    |                                         |            |                                         |    |    |    |    |    |    |    |    |    |    |    |    |    |    |    |    |    |    |    |    |    |    |    |    |    |    |    |    |    |    |    |    |    |  |  |  |  |  |  |  |  |  |  |  |  |
|------------------------------------------------|----------|--------------------|---|-----------------------------|-----------------------------------|---|---|----------------------------------------------------------------------|----|-----------------------------------------|------------|-----------------------------------------|----|----|----|----|----|----|----|----|----|----|----|----|----|----|----|----|----|----|----|----|----|----|----|----|----|----|----|----|----|----|----|----|----|--|--|--|--|--|--|--|--|--|--|--|--|
| 1                                              | 2        | 3                  | 4 | 5                           | 6                                 | 7 | 8 | 9                                                                    | 10 | 11                                      | 12         | 13                                      | 14 | 15 | 16 | 17 | 18 | 19 | 20 | 21 | 22 | 23 | 24 | 25 | 26 | 27 | 28 | 29 | 30 | 31 | 32 | 33 | 34 | 35 | 36 | 37 | 38 | 39 | 40 | 41 | 42 | 43 | 44 | 45 | 46 |  |  |  |  |  |  |  |  |  |  |  |  |
| Raasch, 2000, Australia <sup>23</sup>          | RCT      | 46 GPs (23;23)*    |   |                             |                                   |   |   |                                                                      |    |                                         |            |                                         |    |    |    |    |    |    |    |    |    |    |    |    |    |    |    |    |    |    |    |    |    |    |    |    |    |    |    |    |    |    |    |    |    |  |  |  |  |  |  |  |  |  |  |  |  |
| Argenziano, 2006, Italy and Spain <sup>9</sup> | RCT      | 73 GPs (36;37)*    |   | X                           | ABCD                              | X |   | Three-point checklist                                                |    | Live                                    | 1-day      |                                         |    |    |    |    |    |    |    |    |    |    |    |    |    |    |    |    |    |    |    |    |    |    |    |    |    |    |    |    |    |    |    |    |    |  |  |  |  |  |  |  |  |  |  |  |  |
| Dolianitis, 2005, Australia <sup>35</sup>      | DA study | 35 GPs             |   |                             |                                   |   | X | Menzies method<br>7-point checklist<br>ABCD rule<br>Pattern analysis |    | Literature, E-learning, Self-assessment | PD         |                                         |    |    |    |    |    |    |    |    |    |    |    |    |    |    |    |    |    |    |    |    |    |    |    |    |    |    |    |    |    |    |    |    |    |  |  |  |  |  |  |  |  |  |  |  |  |
| Carli, 2005, Italy <sup>34</sup>               | DA study | 41 GPs             | X | X                           | ABCD(E)                           |   |   |                                                                      | X  | Live                                    | 4h         |                                         |    |    |    |    |    |    |    |    |    |    |    |    |    |    |    |    |    |    |    |    |    |    |    |    |    |    |    |    |    |    |    |    |    |  |  |  |  |  |  |  |  |  |  |  |  |
| De Gannes, 2004, Canada <sup>27</sup>          | RCT      | 27 GPs (10;17)*    | X | X                           |                                   |   |   |                                                                      |    | Literature (Video-format)               | 12min      | Unlimited access to the 12-minute Video |    |    |    |    |    |    |    |    |    |    |    |    |    |    |    |    |    |    |    |    |    |    |    |    |    |    |    |    |    |    |    |    |    |  |  |  |  |  |  |  |  |  |  |  |  |
| English, 2003, Australia <sup>26</sup>         | RCT      | 468 GPs (245;228)* |   |                             |                                   |   |   |                                                                      |    | X                                       | Literature | >6h                                     |    |    |    |    |    |    |    |    |    |    |    |    |    |    |    |    |    |    |    |    |    |    |    |    |    |    |    |    |    |    |    |    |    |  |  |  |  |  |  |  |  |  |  |  |  |
| Del Mar, 1995, Australia <sup>20</sup>         | RCT      | 93 GPs (48;45)*    |   | X + Polaroid instant camera |                                   |   |   |                                                                      |    |                                         | 1h         |                                         |    |    |    |    |    |    |    |    |    |    |    |    |    |    |    |    |    |    |    |    |    |    |    |    |    |    |    |    |    |    |    |    |    |  |  |  |  |  |  |  |  |  |  |  |  |
| Brochez, 2001, Belgium <sup>33</sup>           | DA study | 146 GPs            | X | X                           |                                   |   |   |                                                                      | X  | Live, Literature                        | 2h         |                                         |    |    |    |    |    |    |    |    |    |    |    |    |    |    |    |    |    |    |    |    |    |    |    |    |    |    |    |    |    |    |    |    |    |  |  |  |  |  |  |  |  |  |  |  |  |
| Harris, 1999 and 2001, USA <sup>30,32</sup>    | DA study | 232 GPs<br>17 GPs  | X | X                           | ABCD<br>7-point Glasgow checklist |   |   |                                                                      | X  | Literature, E-learning                  | 1h         |                                         |    |    |    |    |    |    |    |    |    |    |    |    |    |    |    |    |    |    |    |    |    |    |    |    |    |    |    |    |    |    |    |    |    |  |  |  |  |  |  |  |  |  |  |  |  |
| Westerhoff, Australia 2000 <sup>24</sup>       | RCT      | 74 GPs             |   |                             |                                   |   | X | Menzies method                                                       |    | Live, Literature                        | 1h live    |                                         |    |    |    |    |    |    |    |    |    |    |    |    |    |    |    |    |    |    |    |    |    |    |    |    |    |    |    |    |    |    |    |    |    |  |  |  |  |  |  |  |  |  |  |  |  |
| Bedlow, 2000, UK <sup>31</sup>                 | DA study | 17 GPs             |   | X                           |                                   |   |   |                                                                      |    | Live, Literature                        | UD         |                                         |    |    |    |    |    |    |    |    |    |    |    |    |    |    |    |    |    |    |    |    |    |    |    |    |    |    |    |    |    |    |    |    |    |  |  |  |  |  |  |  |  |  |  |  |  |

|                                              |                    |                                   |   |   |  |  |  |   |                              |     |  |
|----------------------------------------------|--------------------|-----------------------------------|---|---|--|--|--|---|------------------------------|-----|--|
| Gerbert, 1998 and 2002, USA <sup>22,25</sup> | RCT                | 52 GPs (26;26)*                   | X | X |  |  |  | X | Live, Literature, E-learning | >3h |  |
| Dolan, 1997, USA <sup>21</sup>               | RCT                | 82 PCPs including 16 GPs (46;36)* | X | X |  |  |  |   | Live                         | 2h  |  |
| Girgis, 1995, Australia <sup>52</sup>        | Case-control study | 41 GPs (24;17)*                   | X | X |  |  |  | X | Live, literature             | >6h |  |

Key: GPs=general practitioners; PCPs= primary care physicians; RCT= randomized controlled trial; DA= diagnostic accuracy; INFORMED= Internet curriculum for melanoma early detection; PD= participant dependent; UD=undisclosed; TADA=trriage amalgamated dermoscopic algorithm  
 \*number of participants in the intervention group and control group

**Table 4. Outcome measures of the melanoma diagnostic educational programs for general practitioners.**

| <b>A. Studies with short-term outcomes</b>      |                                                |           |    |                                                 |      |    |            |                           |    |                                  |            |             |
|-------------------------------------------------|------------------------------------------------|-----------|----|-------------------------------------------------|------|----|------------|---------------------------|----|----------------------------------|------------|-------------|
| <b>Studies</b>                                  | <b>Measured competence in training setting</b> |           |    | <b>Measured performance in clinical setting</b> |      |    |            |                           |    | <b>Timing after the training</b> |            |             |
| (1st author and year of publication)            | DA                                             | Knowledge | AM | B/M ratio                                       | TBSE | DA | confidence | Decrease of VTM incidence | RR | immediately                      | at 1 month | at 3 months |
| <b>Dermoscopic diagnostic training programs</b> |                                                |           |    |                                                 |      |    |            |                           |    |                                  |            |             |
| Sawyers 2020 <sup>48</sup>                      | +                                              |           |    |                                                 |      |    |            |                           |    | X                                |            |             |
| Seiverling 2019 <sup>47</sup>                   | +                                              |           |    |                                                 |      |    |            |                           |    | X                                |            |             |
| Secker 2017 <sup>45</sup>                       | +                                              |           | +  |                                                 |      |    |            |                           |    |                                  |            | X           |
| Rogers 2016 <sup>44</sup>                       | +                                              |           |    |                                                 |      |    |            |                           |    | X                                |            |             |
| Bourne 2012 <sup>40</sup>                       | +                                              |           |    |                                                 |      |    |            |                           |    | X                                |            |             |
| Dolianitis 2005 <sup>35</sup>                   | +                                              |           |    |                                                 |      |    |            |                           |    | X                                |            |             |
| Westerhoff 2000 <sup>24</sup>                   | +                                              | +         |    |                                                 |      |    |            |                           |    | X                                |            |             |
| <b>Clinical diagnostic training programs</b>    |                                                |           |    |                                                 |      |    |            |                           |    |                                  |            |             |
| Beecher, 2018 <sup>46</sup>                     | +                                              | +         | +  |                                                 |      |    |            |                           |    | X                                |            | X           |
| Carli 2005 <sup>34</sup>                        | +                                              |           | +  |                                                 |      |    |            |                           |    | X                                |            |             |
| Mikkilineni 2001;2002 <sup>42,43</sup>          |                                                | +         | +  |                                                 | +    |    | +          |                           |    | X                                |            |             |
| Brochez 2001 <sup>33</sup>                      | +                                              |           |    |                                                 |      |    |            |                           |    | X                                |            |             |
| Harris 2001 <sup>32</sup>                       | +                                              | +         | +  |                                                 |      |    | +          |                           |    | X                                |            |             |
| Harris 1999 <sup>30</sup>                       | +                                              | -         | +  |                                                 |      |    | +          |                           |    | X                                |            |             |
| Raasch 2000 <sup>23</sup>                       | -                                              |           |    |                                                 |      |    | +          |                           |    | 3-month period                   |            |             |
| Bedlow 2000 <sup>31</sup>                       | +                                              | +         |    |                                                 |      |    |            |                           |    | X                                |            |             |
| Gerbert 1998;2002 <sup>22,25</sup>              | +                                              | +         | +  |                                                 |      |    | +          |                           |    | X                                |            |             |
| Dolan 1997 <sup>21</sup>                        | -                                              | +         | -  |                                                 |      |    |            |                           |    | X                                | X          |             |





|                                      |                                              |   |   |   |   |   |   |  |   |   |  |   |                |
|--------------------------------------|----------------------------------------------|---|---|---|---|---|---|--|---|---|--|---|----------------|
| 1<br>2<br>3<br>4<br>5<br>6<br>7<br>8 | Youl 2007 <sup>49</sup>                      |   |   |   |   |   | + |  | + |   |  |   | 6-month period |
| 9                                    | Raasch 2000 <sup>23</sup>                    | - |   |   |   |   |   |  |   |   |  |   | 3-month period |
| 10                                   | Grimaldi 2009 <sup>38</sup>                  | + |   |   | X | X |   |  | + |   |  |   | 6-month period |
| 11                                   | Menzies 2009 <sup>37</sup>                   | + |   | + | X |   | + |  |   |   |  | + | 6-month period |
| 12                                   | <b>Clinical diagnostic training programs</b> |   |   |   |   |   |   |  |   |   |  |   |                |
| 13                                   | Marra, 2020 <sup>53</sup>                    | + |   |   |   | X |   |  | + | + |  | + | at 10 months   |
| 14                                   | Grange 2013 <sup>50</sup>                    | + | + |   | X |   |   |  |   |   |  | + | 3-year period  |
| 15                                   | Markova 2013 <sup>28</sup>                   |   |   |   |   |   |   |  | - |   |  |   | at 12 months   |
| 16                                   | Mikkilineni 2001; 2002 <sup>42,43</sup>      |   | + | + | X |   |   |  |   |   |  |   |                |

Key: DA= diagnostic accuracy; AM=appropriate management; TBSE= total body skin examination; B/M=benign/malignant; VTM= very thick melanomas; RR= decrease in dermatologist referral rates for benign lesions and increase in referral rates for malignant lesions

+ = significant improvement; - = no significant improvement

To note that Shariff et al.<sup>37</sup> and Peuvrel et al.<sup>34</sup> provided only descriptive statistics of their study results. For the other studies, a P-value < 0.05 was considered significant, except for Grimaldi et al.<sup>36</sup> (P-value < 0.001).

**Figure 1.** PRISMA flowchart of study selection process<sup>17</sup>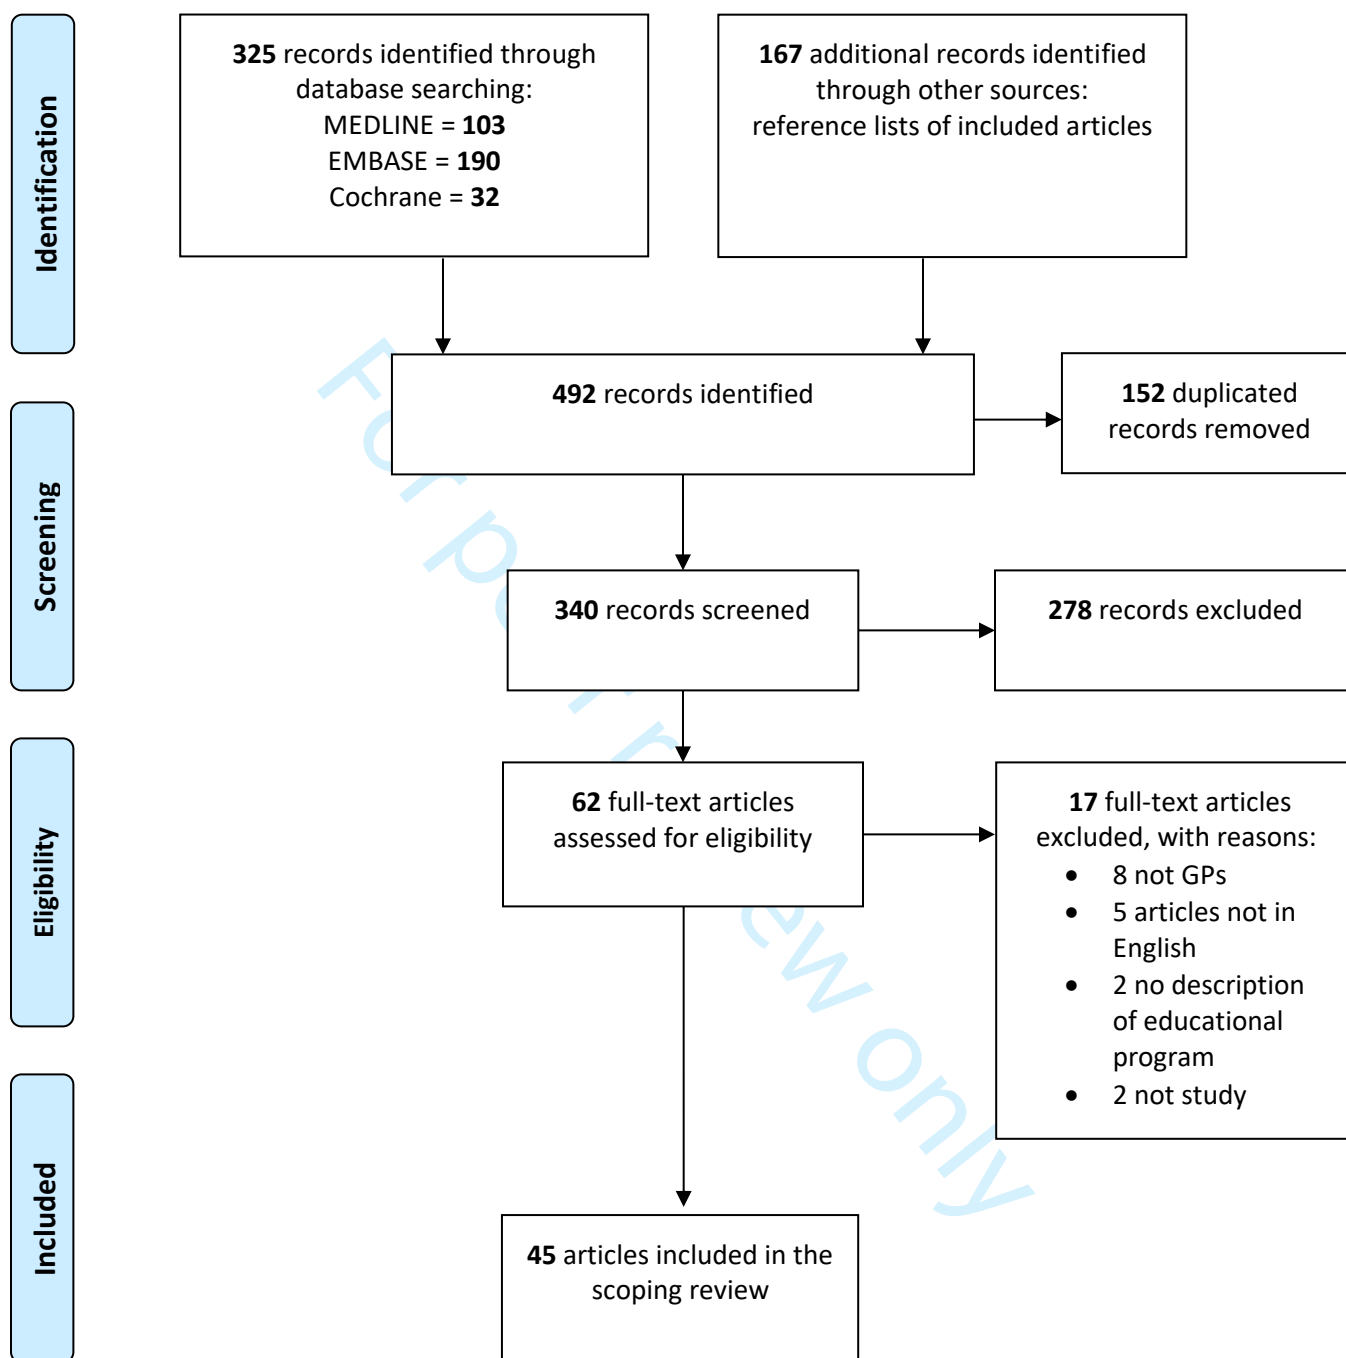

**Supplementary Table 1: Search strategies**

| Database         | Search query                                                                                                                                                                                                                                                                                                                                                                                                                                                                                                                                                                                                                | Limits | Filters | Results | Date          |
|------------------|-----------------------------------------------------------------------------------------------------------------------------------------------------------------------------------------------------------------------------------------------------------------------------------------------------------------------------------------------------------------------------------------------------------------------------------------------------------------------------------------------------------------------------------------------------------------------------------------------------------------------------|--------|---------|---------|---------------|
| EMBASE           | ('general practitioner'/exp OR 'gp (general practitioner)' OR 'family doctor' OR 'family physician' OR 'general practitioner' OR 'general practitioners' OR 'physicians, family' OR 'physicians, primary care' OR 'practitioner, general' OR 'primary care doctor' OR 'primary care physician' OR 'primary care physicians') AND ('education'/exp OR 'education' OR 'self-evaluation programmes' OR 'self-evaluation programs' OR 'training support') AND ('melanoma'/exp OR 'malignant melanoma' OR 'melanoma' OR 'nevi and melanomas' OR 'naevi and melanomas') AND ('diagnosis'/exp OR 'diagnosis' OR 'diagnostic tool') | none   | none    | 190     | 4 May 2020    |
| MEDLINE          | "('General Practitioners'[MeSH Terms] OR 'General Practice'[MeSH Terms] OR 'Family Practice'[MeSH Terms] OR 'physicians, primary care'[MeSH Terms]) AND 'Melanoma'[MeSH Terms] AND 'Diagnosis'[MeSH Terms]"                                                                                                                                                                                                                                                                                                                                                                                                                 | none   | none    | 103     | 27 April 2020 |
| Cochrane Library | melanoma in Title Abstract Keyword AND diagnosis in Title Abstract Keyword AND general practitioner in Title Abstract Keyword OR family medicine in Title Abstract Keyword AND dermoscopy in Title Abstract Keyword (Word variations have been searched)                                                                                                                                                                                                                                                                                                                                                                    | none   | none    | 32      | 28 April 2020 |

## Preferred Reporting Items for Systematic reviews and Meta-Analyses extension for Scoping Reviews (PRISMA-ScR) Checklist

| SECTION                                               | ITEM | PRISMA-ScR CHECKLIST ITEM                                                                                                                                                                                                                                                                                  | REPORTED ON PAGE # |
|-------------------------------------------------------|------|------------------------------------------------------------------------------------------------------------------------------------------------------------------------------------------------------------------------------------------------------------------------------------------------------------|--------------------|
| <b>TITLE</b>                                          |      |                                                                                                                                                                                                                                                                                                            |                    |
| Title                                                 | 1    | Identify the report as a scoping review.                                                                                                                                                                                                                                                                   | 1                  |
| <b>ABSTRACT</b>                                       |      |                                                                                                                                                                                                                                                                                                            |                    |
| Structured summary                                    | 2    | Provide a structured summary that includes (as applicable): background, objectives, eligibility criteria, sources of evidence, charting methods, results, and conclusions that relate to the review questions and objectives.                                                                              | 2                  |
| <b>INTRODUCTION</b>                                   |      |                                                                                                                                                                                                                                                                                                            |                    |
| Rationale                                             | 3    | Describe the rationale for the review in the context of what is already known. Explain why the review questions/objectives lend themselves to a scoping review approach.                                                                                                                                   | 4                  |
| Objectives                                            | 4    | Provide an explicit statement of the questions and objectives being addressed with reference to their key elements (e.g., population or participants, concepts, and context) or other relevant key elements used to conceptualize the review questions and/or objectives.                                  | 4                  |
| <b>METHODS</b>                                        |      |                                                                                                                                                                                                                                                                                                            |                    |
| Protocol and registration                             | 5    | Indicate whether a review protocol exists; state if and where it can be accessed (e.g., a Web address); and if available, provide registration information, including the registration number.                                                                                                             | N.A.               |
| Eligibility criteria                                  | 6    | Specify characteristics of the sources of evidence used as eligibility criteria (e.g., years considered, language, and publication status), and provide a rationale.                                                                                                                                       | 5                  |
| Information sources*                                  | 7    | Describe all information sources in the search (e.g., databases with dates of coverage and contact with authors to identify additional sources), as well as the date the most recent search was executed.                                                                                                  | 5-6                |
| Search                                                | 8    | Present the full electronic search strategy for at least 1 database, including any limits used, such that it could be repeated.                                                                                                                                                                            | 6                  |
| Selection of sources of evidence†                     | 9    | State the process for selecting sources of evidence (i.e., screening and eligibility) included in the scoping review.                                                                                                                                                                                      | 6                  |
| Data charting process‡                                | 10   | Describe the methods of charting data from the included sources of evidence (e.g., calibrated forms or forms that have been tested by the team before their use, and whether data charting was done independently or in duplicate) and any processes for obtaining and confirming data from investigators. | 6                  |
| Data items                                            | 11   | List and define all variables for which data were sought and any assumptions and simplifications made.                                                                                                                                                                                                     | Table 2            |
| Critical appraisal of individual sources of evidence§ | 12   | If done, provide a rationale for conducting a critical appraisal of included sources of evidence; describe the methods used and how this information was used in any data synthesis (if appropriate).                                                                                                      | 5                  |



| SECTION                                       | ITEM | PRISMA-ScR CHECKLIST ITEM                                                                                                                                                                       | REPORTED ON PAGE # |
|-----------------------------------------------|------|-------------------------------------------------------------------------------------------------------------------------------------------------------------------------------------------------|--------------------|
| Synthesis of results                          | 13   | Describe the methods of handling and summarizing the data that were charted.                                                                                                                    | 6                  |
| <b>RESULTS</b>                                |      |                                                                                                                                                                                                 |                    |
| Selection of sources of evidence              | 14   | Give numbers of sources of evidence screened, assessed for eligibility, and included in the review, with reasons for exclusions at each stage, ideally using a flow diagram.                    | <b>Figure 1</b>    |
| Characteristics of sources of evidence        | 15   | For each source of evidence, present characteristics for which data were charted and provide the citations.                                                                                     | <b>Table 3</b>     |
| Critical appraisal within sources of evidence | 16   | If done, present data on critical appraisal of included sources of evidence (see item 12).                                                                                                      | <b>N.A.</b>        |
| Results of individual sources of evidence     | 17   | For each included source of evidence, present the relevant data that were charted that relate to the review questions and objectives.                                                           | <b>Table 3</b>     |
| Synthesis of results                          | 18   | Summarize and/or present the charting results as they relate to the review questions and objectives.                                                                                            | <b>7-8</b>         |
| <b>DISCUSSION</b>                             |      |                                                                                                                                                                                                 |                    |
| Summary of evidence                           | 19   | Summarize the main results (including an overview of concepts, themes, and types of evidence available), link to the review questions and objectives, and consider the relevance to key groups. | <b>9-10-11</b>     |
| Limitations                                   | 20   | Discuss the limitations of the scoping review process.                                                                                                                                          | <b>12</b>          |
| Conclusions                                   | 21   | Provide a general interpretation of the results with respect to the review questions and objectives, as well as potential implications and/or next steps.                                       | <b>13</b>          |
| <b>FUNDING</b>                                |      |                                                                                                                                                                                                 |                    |
| Funding                                       | 22   | Describe sources of funding for the included sources of evidence, as well as sources of funding for the scoping review. Describe the role of the funders of the scoping review.                 | <b>1</b>           |

JBI = Joanna Briggs Institute; PRISMA-ScR = Preferred Reporting Items for Systematic reviews and Meta-Analyses extension for Scoping Reviews.

\* Where *sources of evidence* (see second footnote) are compiled from, such as bibliographic databases, social media platforms, and Web sites.

† A more inclusive/heterogeneous term used to account for the different types of evidence or data sources (e.g., quantitative and/or qualitative research, expert opinion, and policy documents) that may be eligible in a scoping review as opposed to only studies. This is not to be confused with *information sources* (see first footnote).

‡ The frameworks by Arksey and O'Malley (6) and Levac and colleagues (7) and the JBI guidance (4, 5) refer to the process of data extraction in a scoping review as data charting.

§ The process of systematically examining research evidence to assess its validity, results, and relevance before using it to inform a decision. This term is used for items 12 and 19 instead of "risk of bias" (which is more applicable to systematic reviews of interventions) to include and acknowledge the various sources of evidence that may be used in a scoping review (e.g., quantitative and/or qualitative research, expert opinion, and policy document).

From: Tricco AC, Lillie E, Zarin W, O'Brien KK, Colquhoun H, Levac D, et al. PRISMA Extension for Scoping Reviews (PRISMA-ScR): Checklist and Explanation. *Ann Intern Med.* 2018;169:467–473. doi: [10.7326/M18-0850](https://doi.org/10.7326/M18-0850).



**St. Michael's**

Inspired Care.  
Inspiring Science.

For peer review only - <http://bmjopen.bmj.com/site/about/guidelines.xhtml>
