# Supplementary material for: Training general practitioners in melanoma diagnosis: a scoping review of the literature
Source: PubMed Central journal article supplement — BMJ Open. 2021 Mar 23;11(3):e043926. doi: 10.1136/bmjopen-2020-043926 (PMC7993310; doi:10.1136/bmjopen-2020-043926), 2021-03-23
Supplement: bmjopen-2020-043926supp001.pdf [file bmjopen-2020-043926supp001.pdf]

**Supplementary Table 1: Search strategies**

| Database         | Search query                                                                                                                                                                                                                                                                                                                                                                                                                                                                                                                                                                                                                | Limits | Filters | Results | Date          |
|------------------|-----------------------------------------------------------------------------------------------------------------------------------------------------------------------------------------------------------------------------------------------------------------------------------------------------------------------------------------------------------------------------------------------------------------------------------------------------------------------------------------------------------------------------------------------------------------------------------------------------------------------------|--------|---------|---------|---------------|
| EMBASE           | ('general practitioner'/exp OR 'gp (general practitioner)' OR 'family doctor' OR 'family physician' OR 'general practitioner' OR 'general practitioners' OR 'physicians, family' OR 'physicians, primary care' OR 'practitioner, general' OR 'primary care doctor' OR 'primary care physician' OR 'primary care physicians') AND ('education'/exp OR 'education' OR 'self-evaluation programmes' OR 'self-evaluation programs' OR 'training support') AND ('melanoma'/exp OR 'malignant melanoma' OR 'melanoma' OR 'nevi and melanomas' OR 'naevi and melanomas') AND ('diagnosis'/exp OR 'diagnosis' OR 'diagnostic tool') | none   | none    | 190     | 4 May 2020    |
| MEDLINE          | "('General Practitioners'[MeSH Terms] OR 'General Practice'[MeSH Terms] OR 'Family Practice'[MeSH Terms] OR 'physicians, primary care'[MeSH Terms]) AND 'Melanoma'[MeSH Terms] AND 'Diagnosis'[MeSH Terms]"                                                                                                                                                                                                                                                                                                                                                                                                                 | none   | none    | 103     | 27 April 2020 |
| Cochrane Library | melanoma in Title Abstract Keyword AND diagnosis in Title Abstract Keyword AND general practitioner in Title Abstract Keyword OR family medicine in Title Abstract Keyword AND dermoscopy in Title Abstract Keyword (Word variations have been searched)                                                                                                                                                                                                                                                                                                                                                                    | none   | none    | 32      | 28 April 2020 |
